# Supplementary material for: Phosphine-catalyzed dearomative (3 + 2) annulation of 2-nitrobenzofurans and nitrobenzothiophenes with allenoates
Source: Royal Society of Chemistry journal article supplement (doi:10.1039/c9ob00775j), 2019-01-01
Supplement: c9ob00775j1.pdf [file c9ob00775j1.pdf]

# Phosphine-Catalyzed Dearomative (3+2) Annulation of 2-Nitrobenzofurans and Nitrobenzothiophenes with Allenolate

Jian-Qiang Zhao,<sup>a,\*</sup> Lei Yang,<sup>b</sup> Yong You,<sup>a</sup> Zhen-Hua Wang,<sup>a</sup> Ke-Xin Xie,<sup>c</sup> Xiao-Mei Zhang,<sup>b</sup>  
Xiao-Ying Xu,<sup>b</sup> and Wei-Cheng Yuan<sup>b,\*</sup>

<sup>a</sup> Institute for Advanced Study, Chengdu University, Chengdu 610106, China

<sup>b</sup> National Engineering Research Center of Chiral Drugs, Chengdu Institute of Organic Chemistry,  
Chinese Academy of Sciences, Chengdu, 610041, China.

<sup>c</sup> Chengdu Institute of Biology, Chinese Academy of Sciences, Chengdu 610041, China

\*E-mail: zhaojianqiang@cdu.edu.cn

\*E-mail: yuanwc@cioc.ac.cn

## Supporting Information

### Table of Contents

|                                                                                                                      |     |
|----------------------------------------------------------------------------------------------------------------------|-----|
| 1. X-ray crystal structure of compound <b>3o</b> .....                                                               | S1  |
| 2. <sup>1</sup> H and <sup>13</sup> C NMR for new substrates <b>4</b> and <b>6</b> .....                             | S2  |
| 3. <sup>1</sup> H and <sup>13</sup> C NMR for compounds <b>3</b> , <b>5</b> , <b>7</b> , <b>8</b> and <b>9</b> ..... | S10 |

1. X-ray crystal structure of compound **3o**

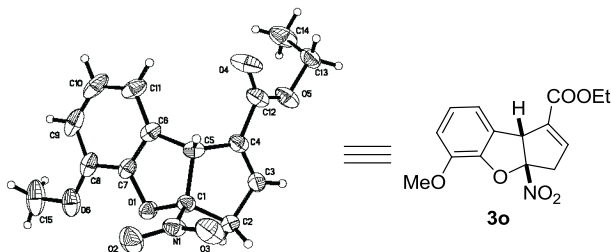

ORTEP of **3o** (at 50% level)

Crystal data and structure refinement for **3o** (CCDC-1900800)

|                                             |                                                               |
|---------------------------------------------|---------------------------------------------------------------|
| Identification code                         | <b>3o</b>                                                     |
| Empirical formula                           | C <sub>15</sub> H <sub>15</sub> NO <sub>6</sub>               |
| Formula weight                              | 305.28                                                        |
| Temperature/K                               | 293(2)                                                        |
| Crystal system                              | triclinic                                                     |
| Space group                                 | P-1                                                           |
| a/Å                                         | 6.9301(3)                                                     |
| b/Å                                         | 12.5301(7)                                                    |
| c/Å                                         | 17.0571(10)                                                   |
| α/°                                         | 85.888(5)                                                     |
| β/°                                         | 88.194(4)                                                     |
| γ/°                                         | 79.004(4)                                                     |
| Volume/Å <sup>3</sup>                       | 1449.97(14)                                                   |
| Z                                           | 4                                                             |
| ρ <sub>calc</sub> /cm <sup>3</sup>          | 1.398                                                         |
| μ/mm <sup>-1</sup>                          | 0.926                                                         |
| F(000)                                      | 640.0                                                         |
| Crystal size/mm <sup>3</sup>                | 0.2 × 0.14 × 0.1                                              |
| Radiation                                   | CuKα (λ = 1.54184)                                            |
| 2θ range for data collection/°              | 7.204 to 134.152                                              |
| Index ranges                                | -8 ≤ h ≤ 5, -14 ≤ k ≤ 14, -20 ≤ l ≤ 20                        |
| Reflections collected                       | 10304                                                         |
| Independent reflections                     | 5176 [R <sub>int</sub> = 0.0235, R <sub>sigma</sub> = 0.0373] |
| Data/restraints/parameters                  | 5176/4/418                                                    |
| Goodness-of-fit on F <sup>2</sup>           | 1.039                                                         |
| Final R indexes [I ≥ 2σ (I)]                | R <sub>1</sub> = 0.0496, wR <sub>2</sub> = 0.1333             |
| Final R indexes [all data]                  | R <sub>1</sub> = 0.0633, wR <sub>2</sub> = 0.1480             |
| Largest diff. peak/hole / e Å <sup>-3</sup> | 0.20/-0.20                                                    |

## 2. $^1\text{H}$ and $^{13}\text{C}$ for new substrates 4 and 6

### $^1\text{H}$ and $^{13}\text{C}$ NMR of **4b**

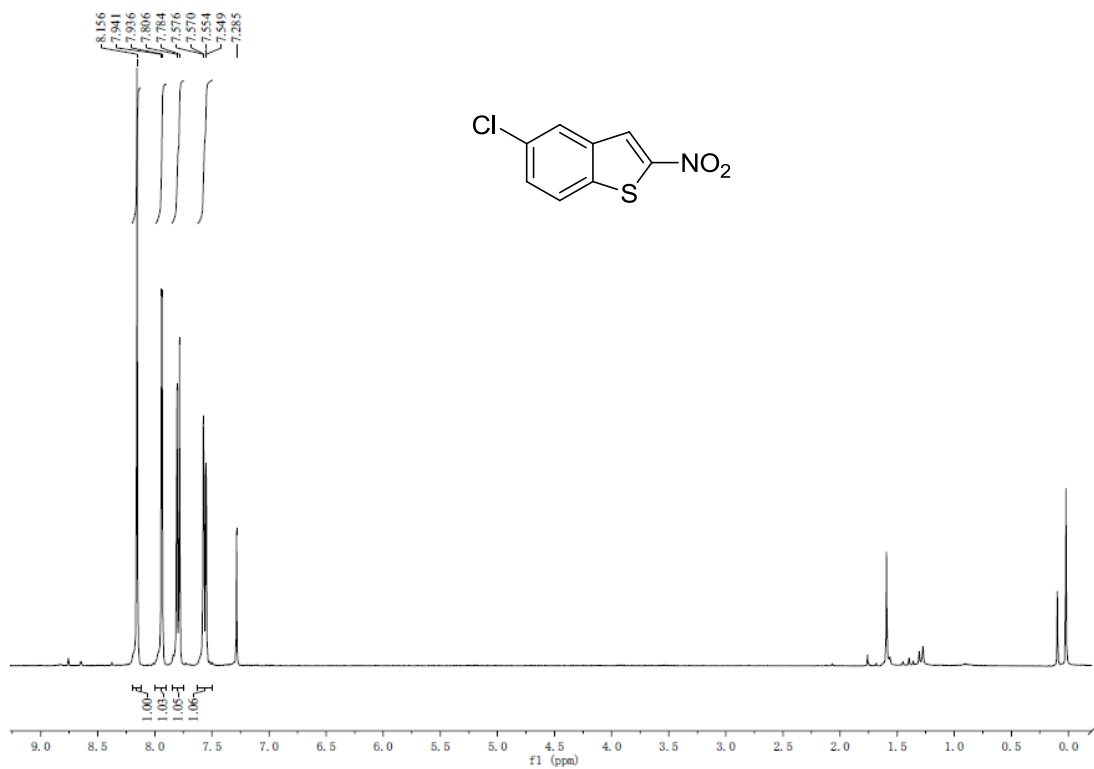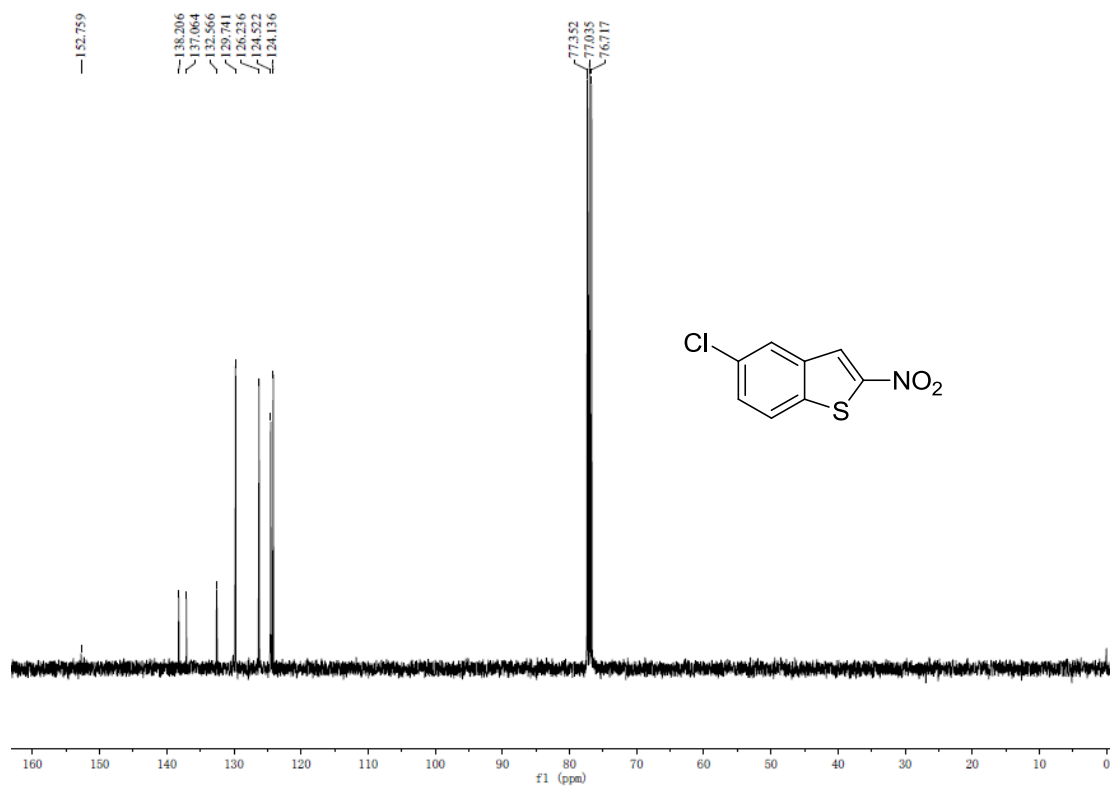

$^1\text{H}$  and  $^{13}\text{C}$  NMR of **4c**

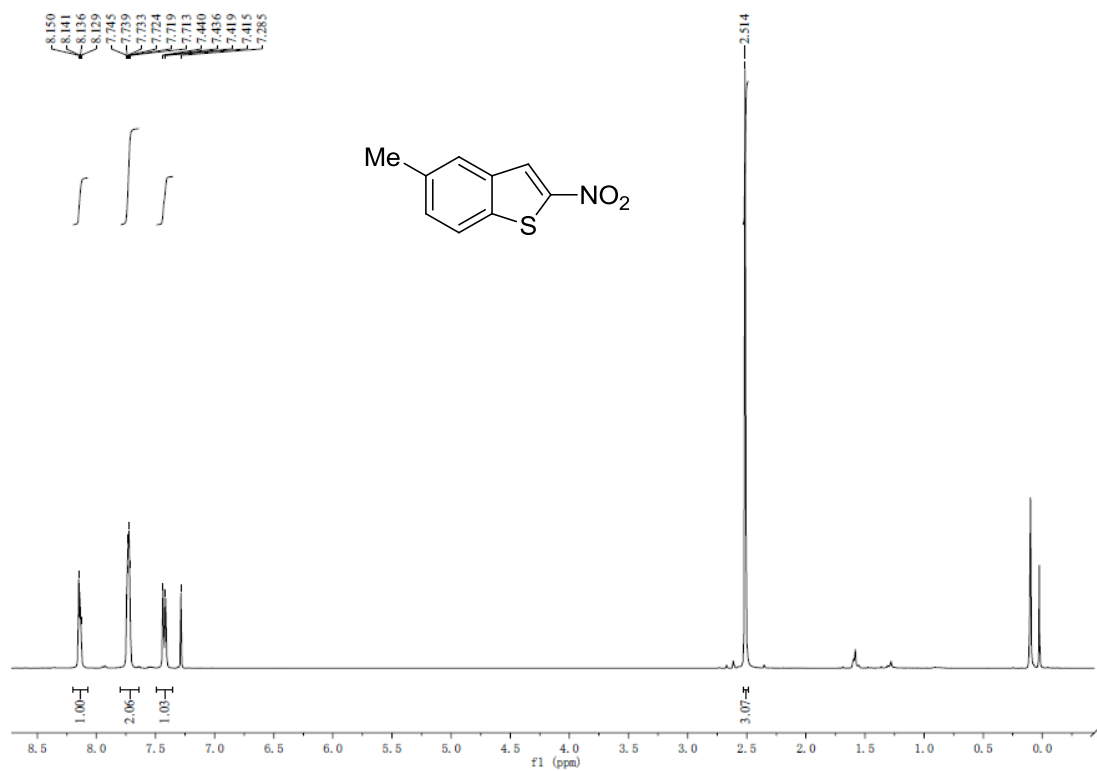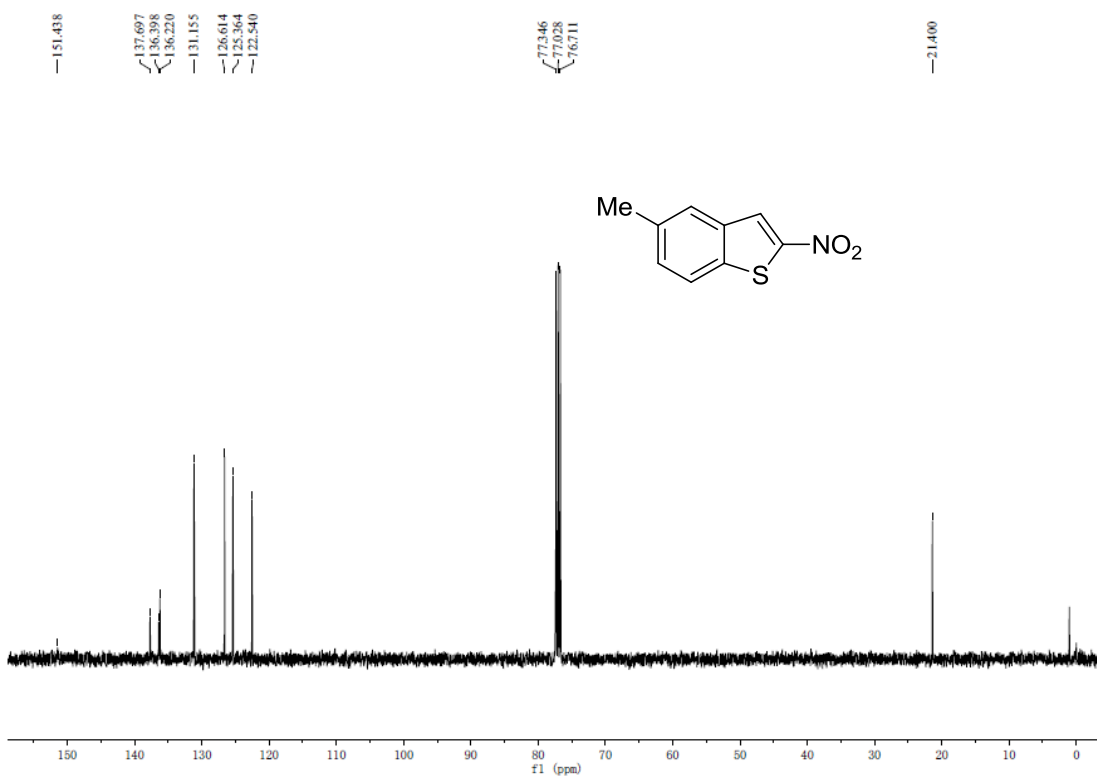

$^1\text{H}$  and  $^{13}\text{C}$  NMR of **4d**

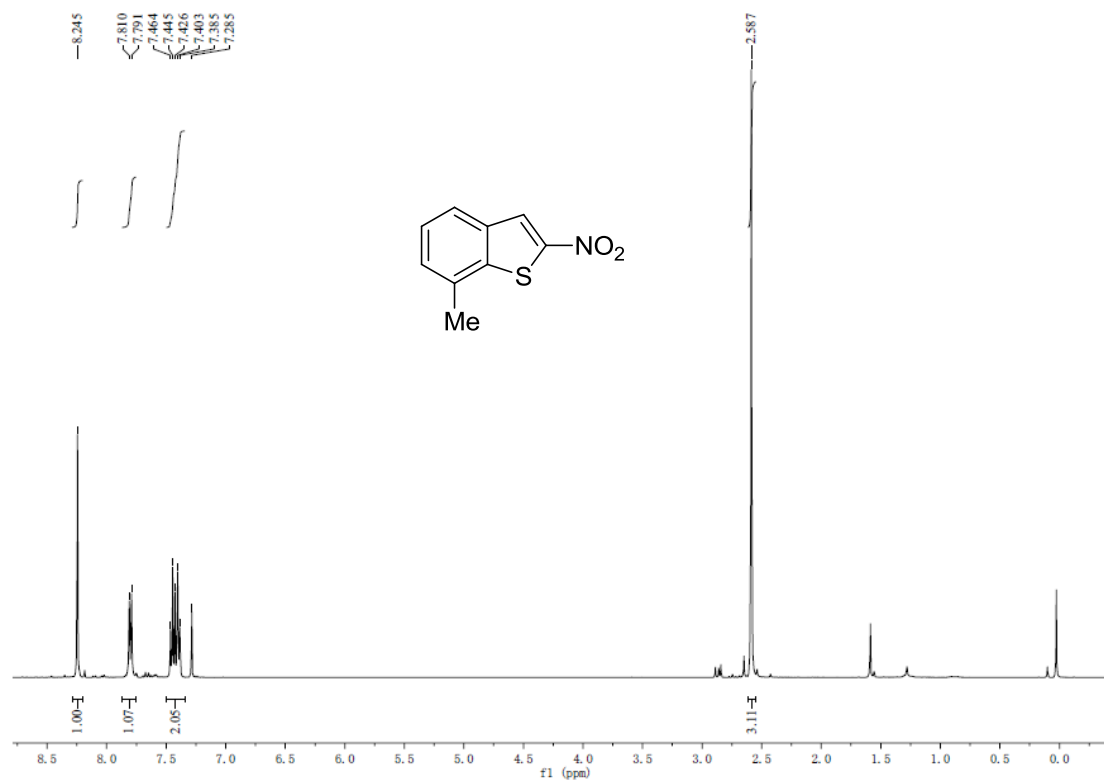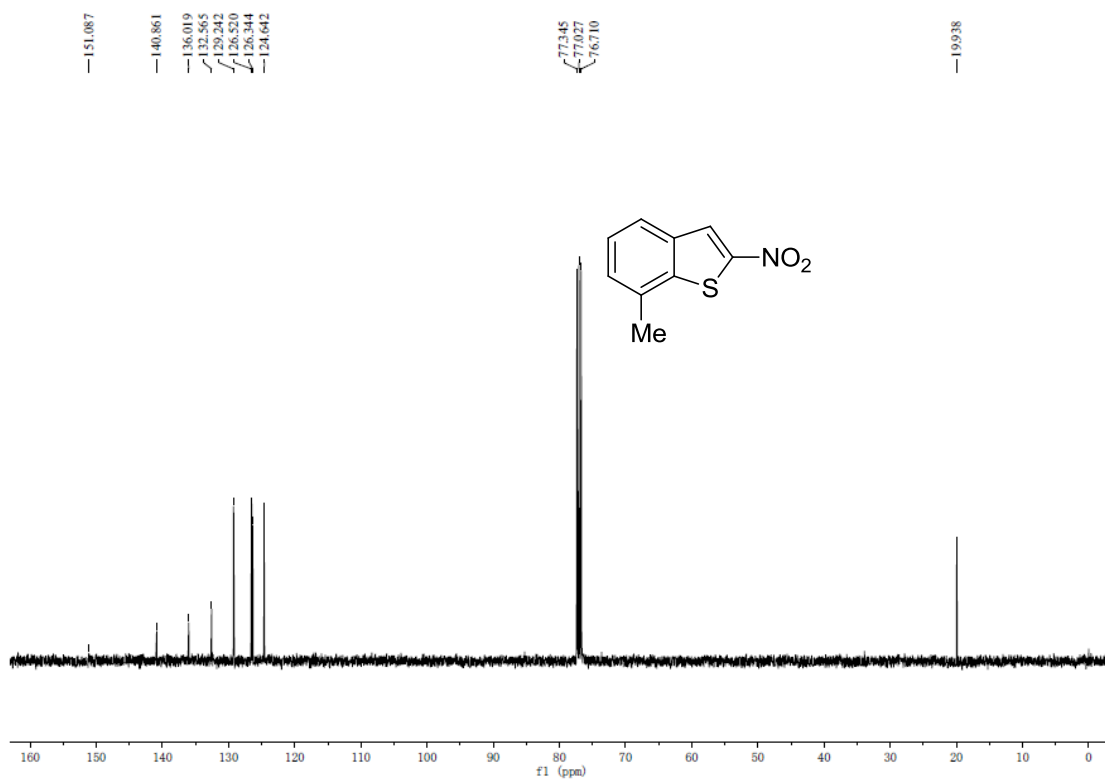

# <sup>1</sup>H and <sup>13</sup>C NMR of 6b

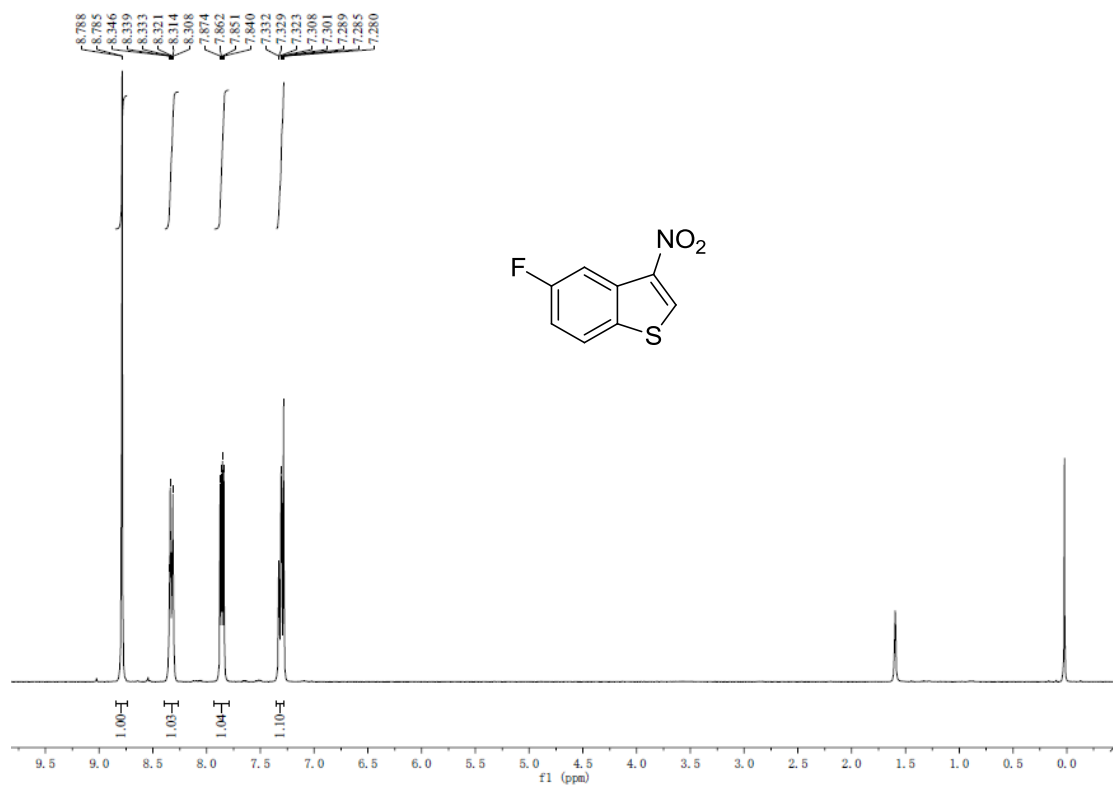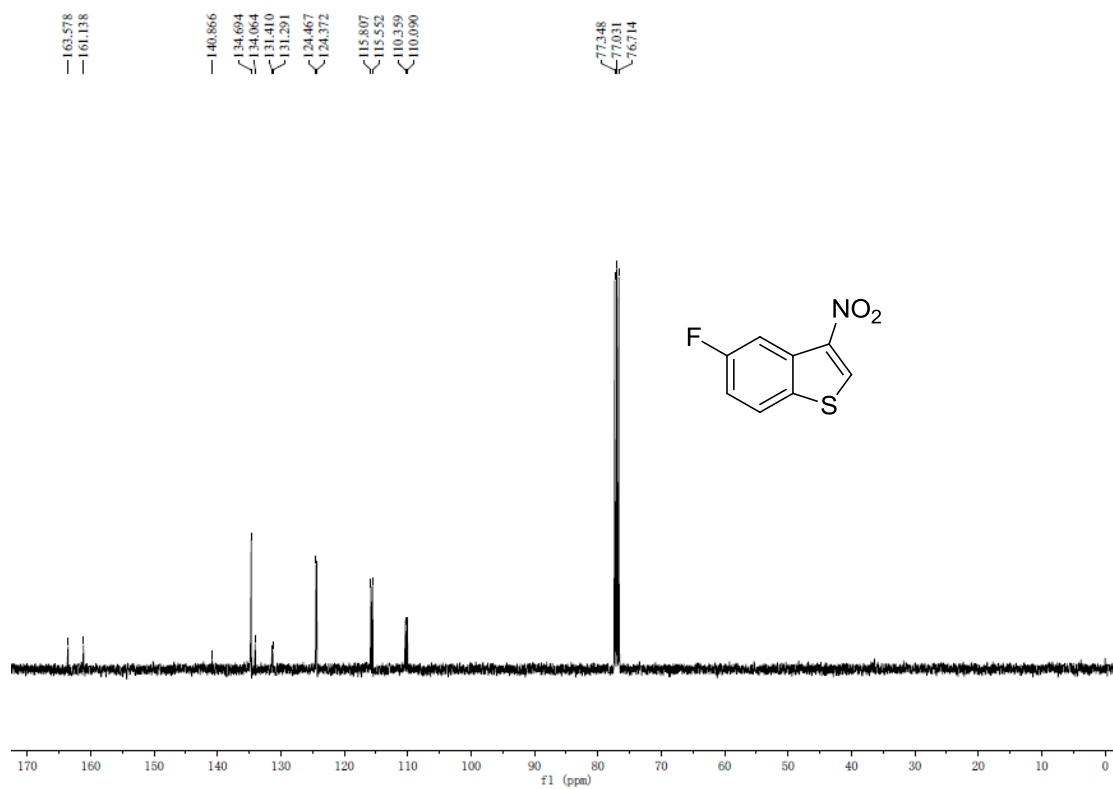

# $^1\text{H}$ and $^{13}\text{C}$ NMR of 6c

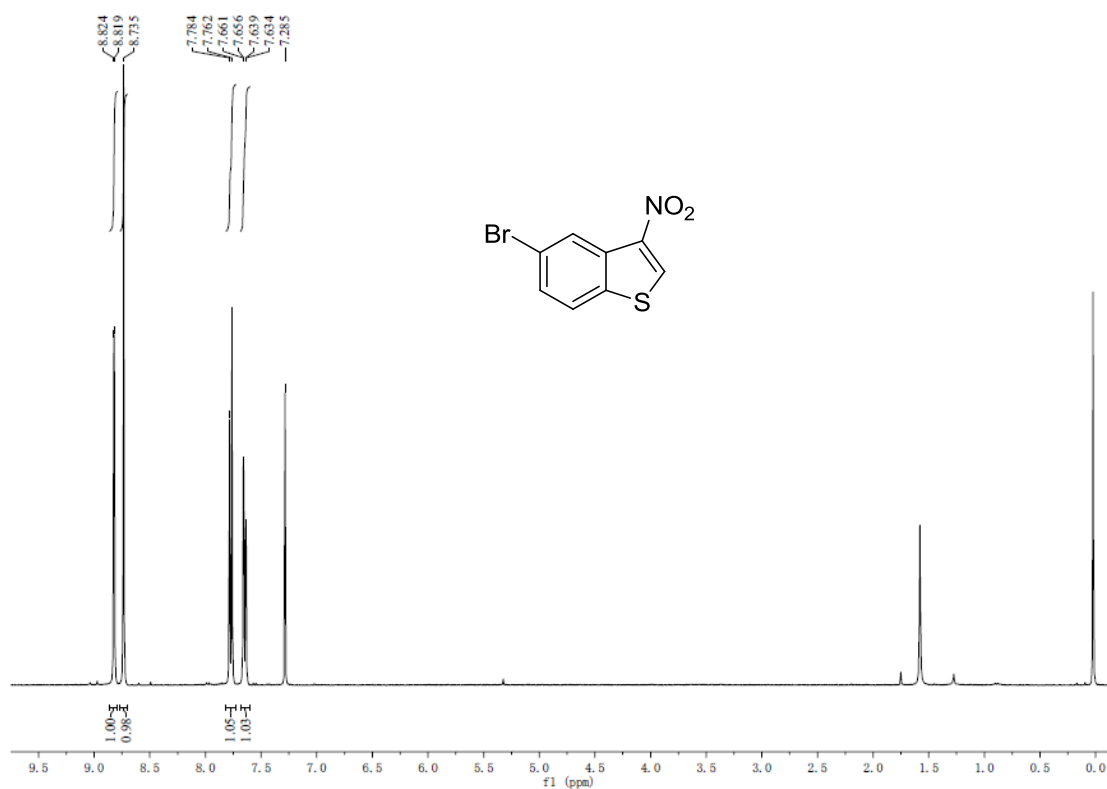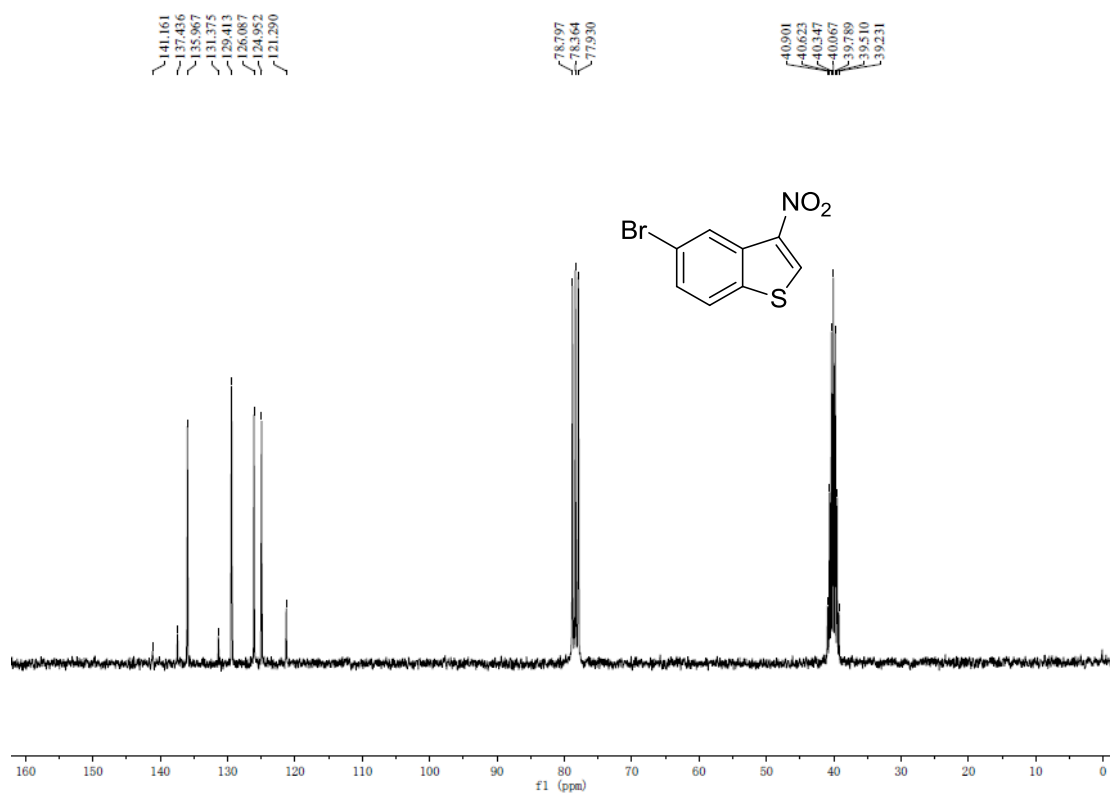

# <sup>1</sup>H and <sup>13</sup>C NMR of 6d

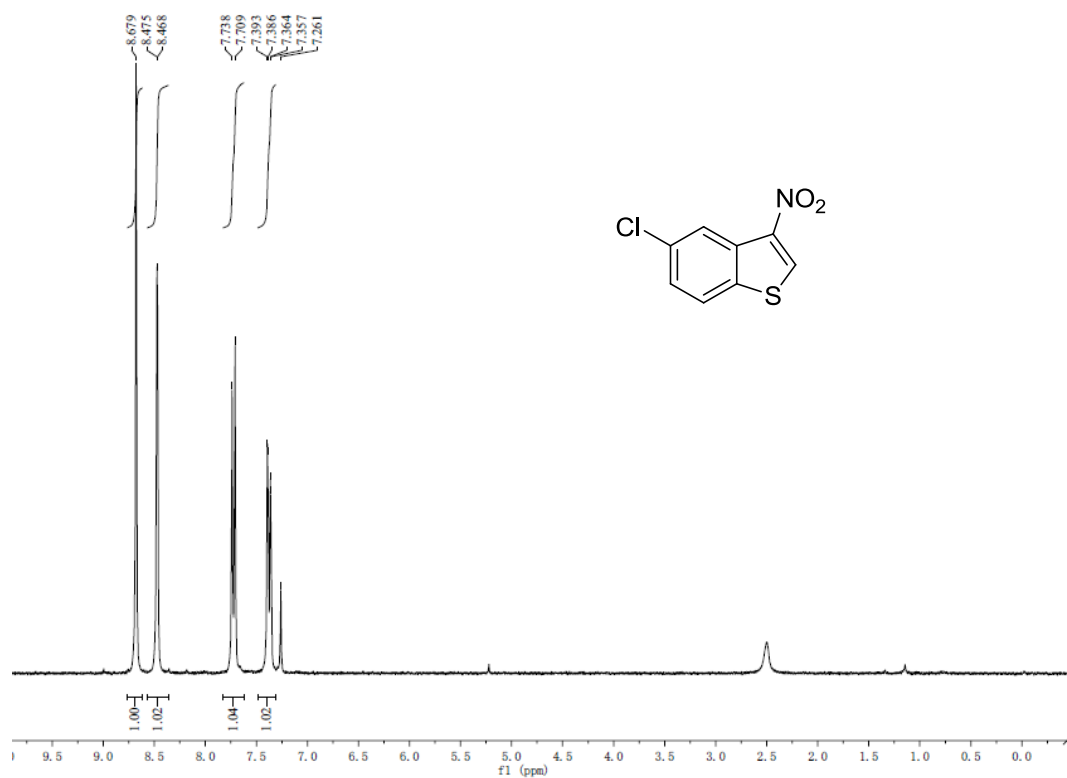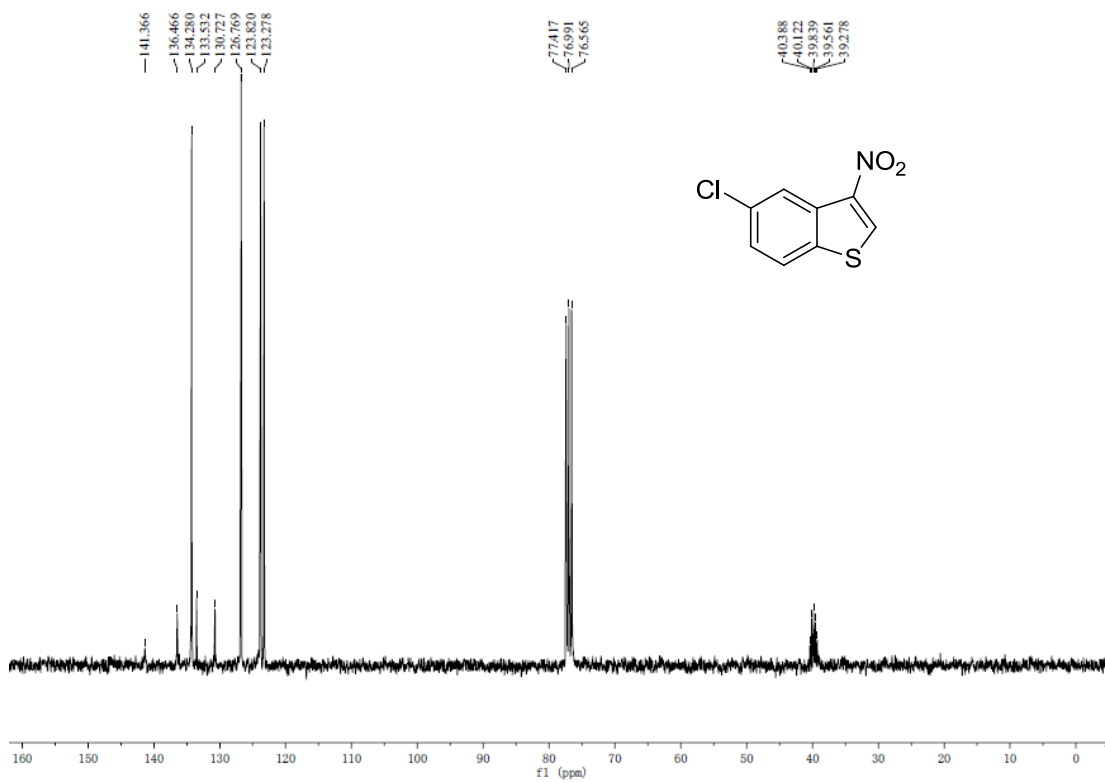



# $^1\text{H}$ and $^{13}\text{C}$ NMR of 6e

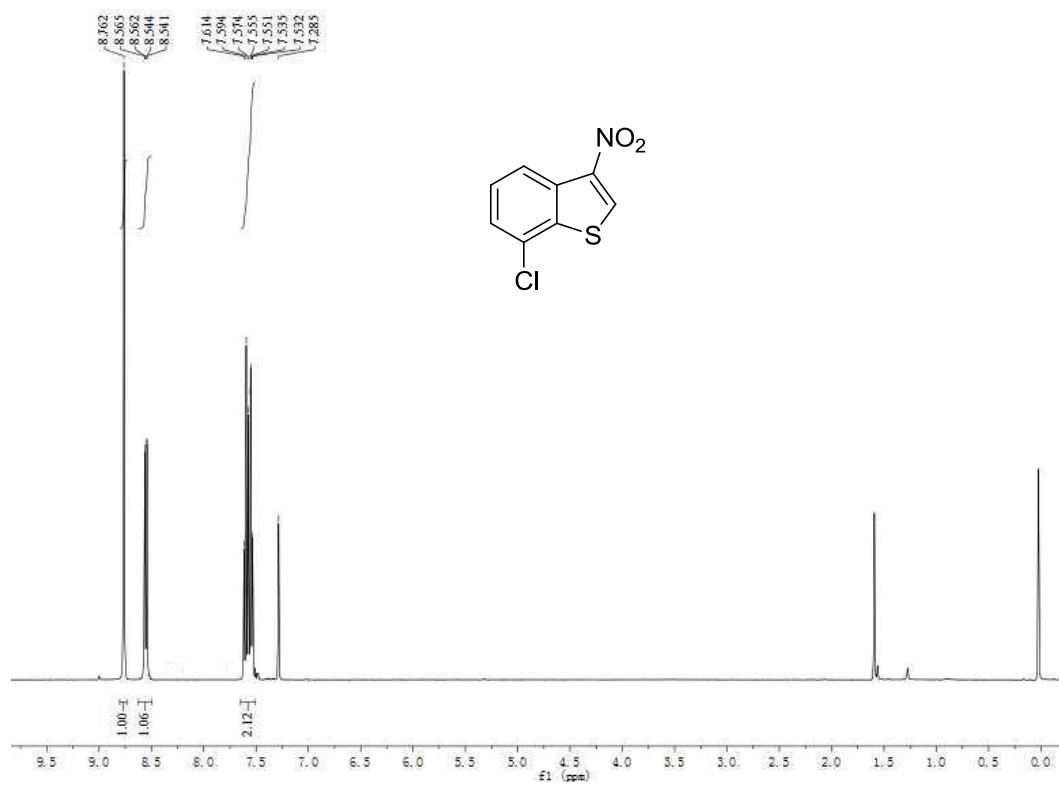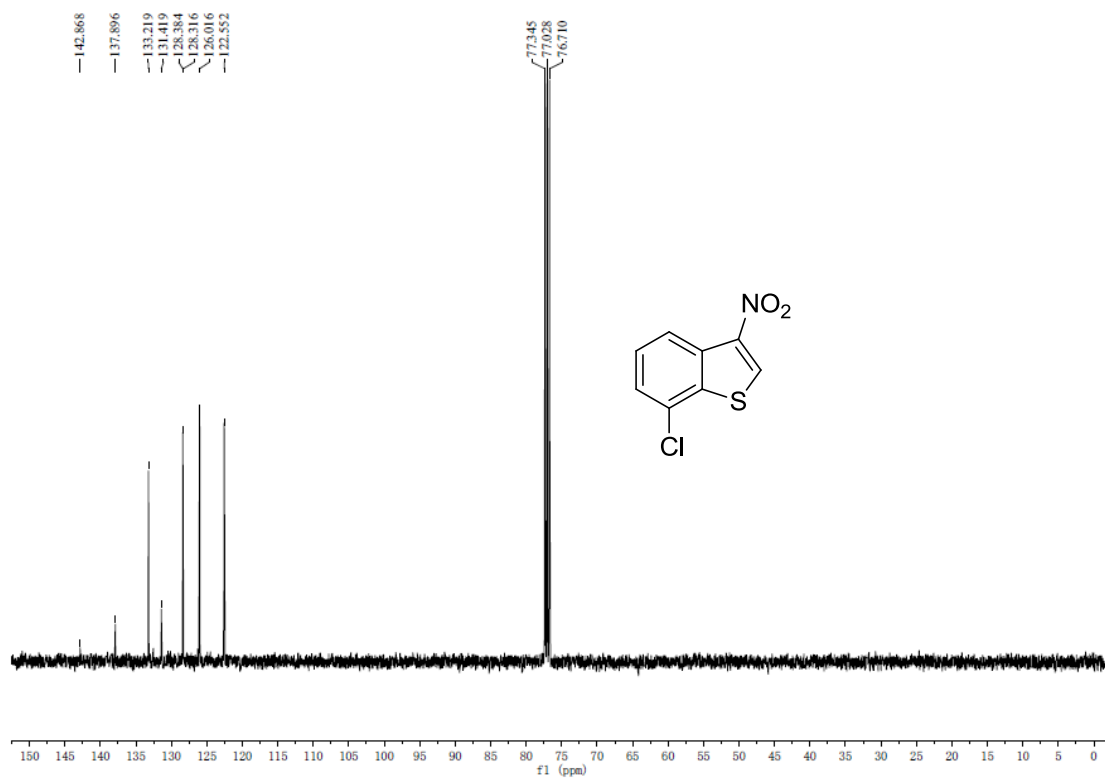

$^1\text{H}$  and  $^{13}\text{C}$  NMR of **6f**

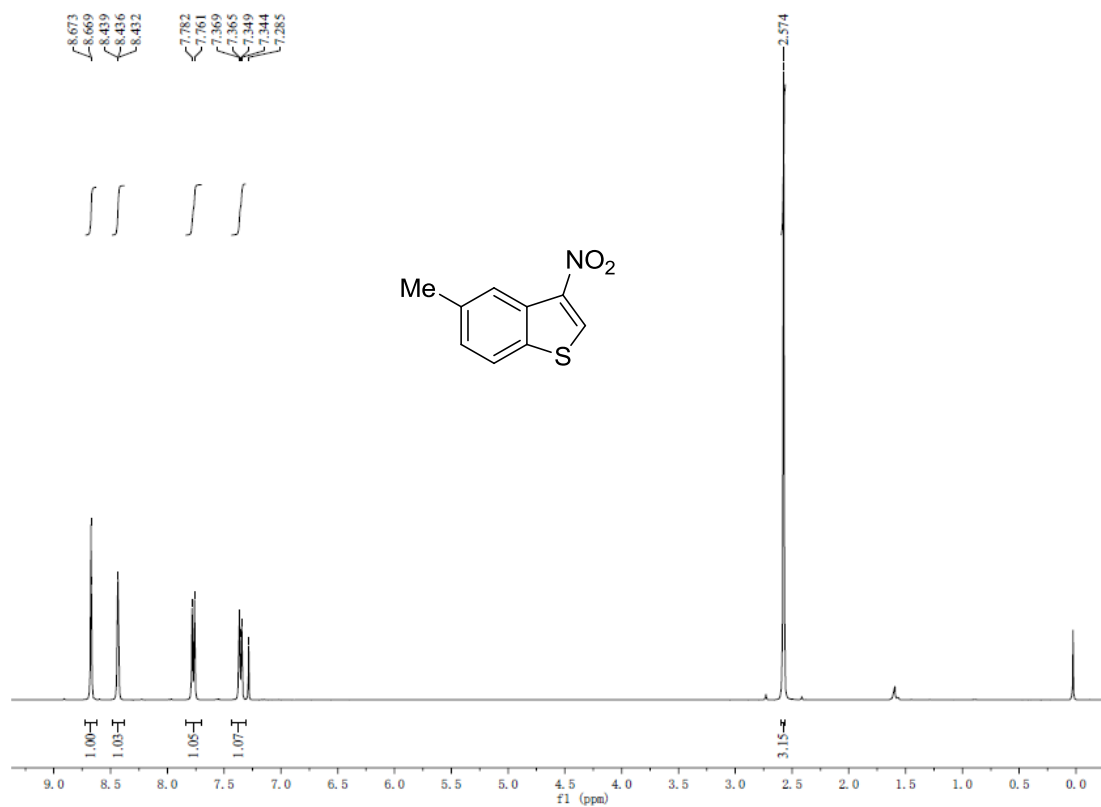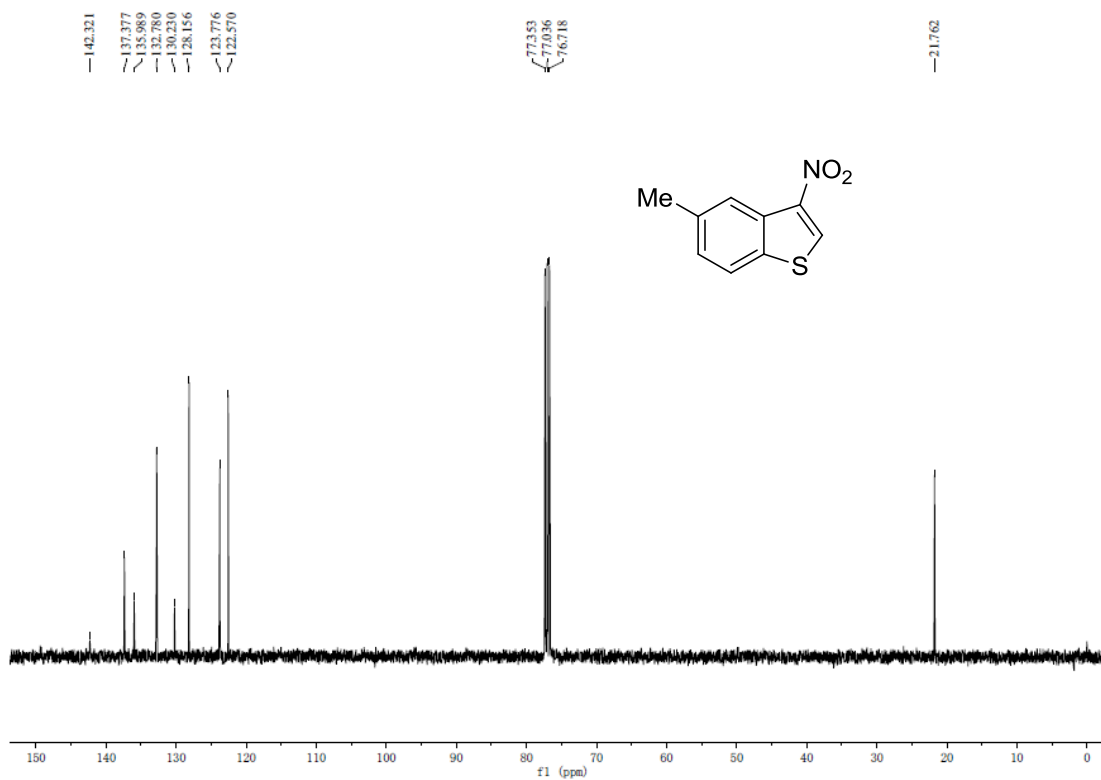

### 3. $^1\text{H}$ and $^{13}\text{C}$ for compounds 3, 5, 7 and 8

#### $^1\text{H}$ and $^{13}\text{C}$ NMR of 3a

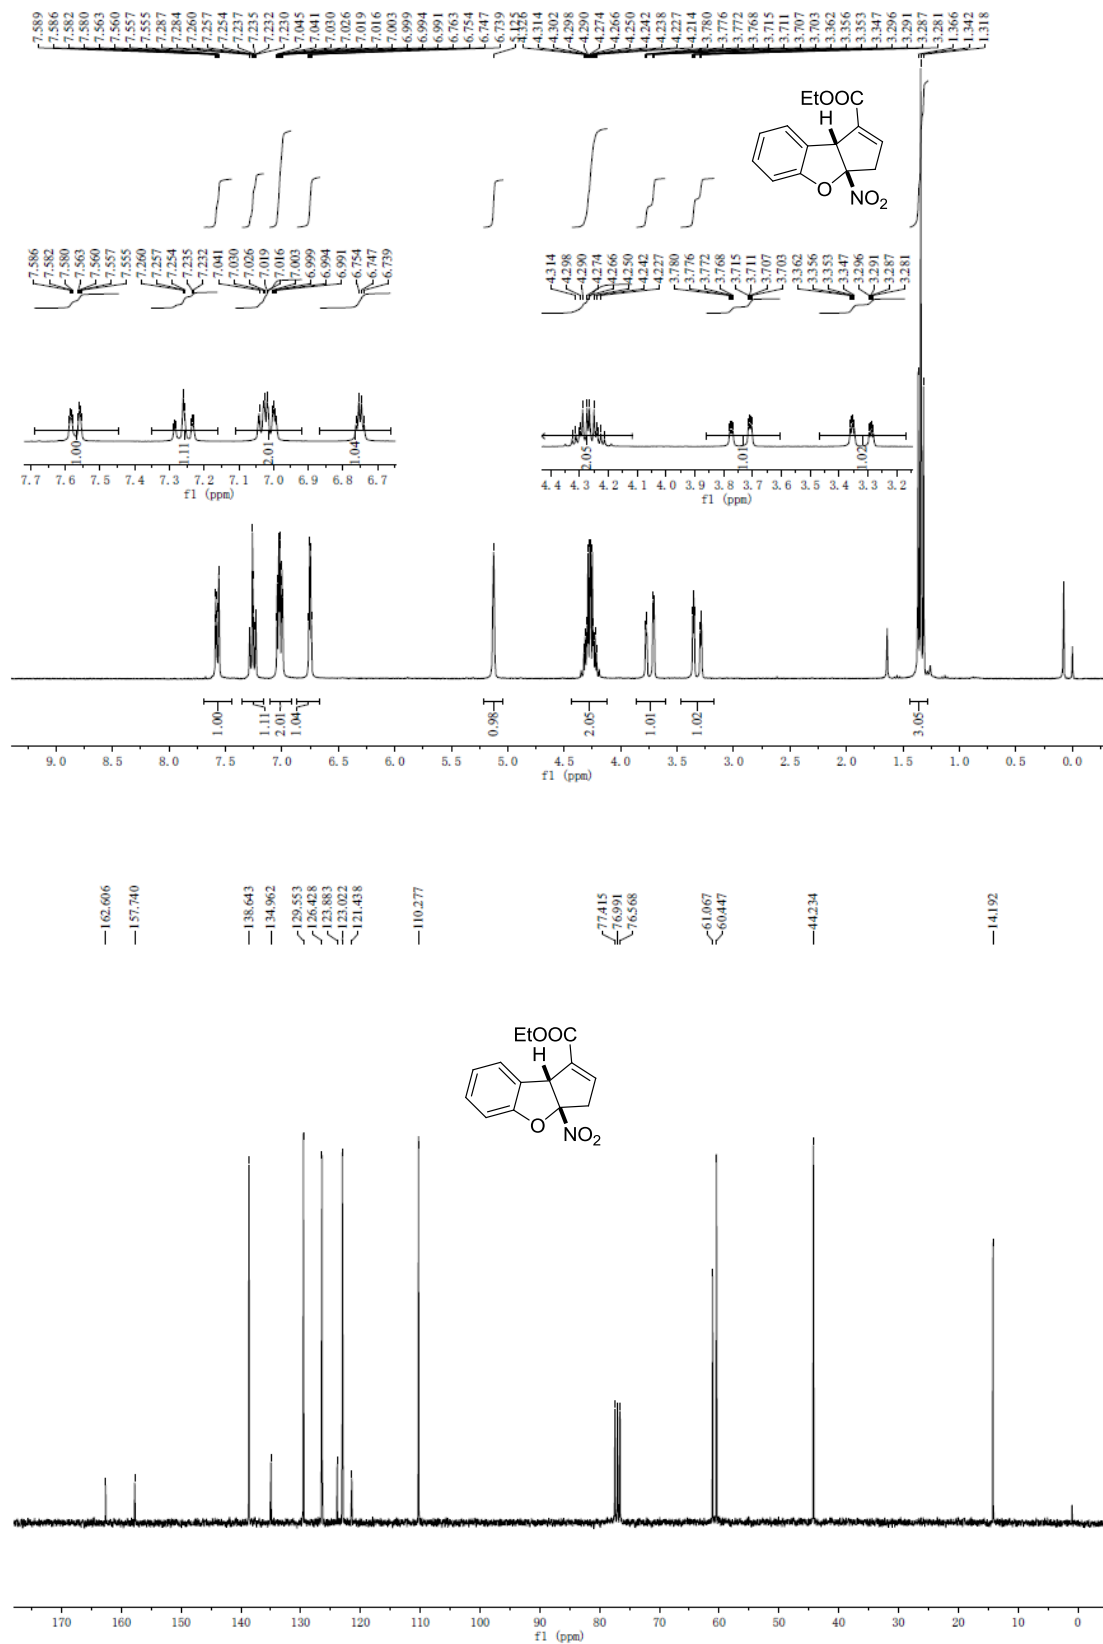

$^1\text{H}$  and  $^{13}\text{C}$  NMR of **3b**

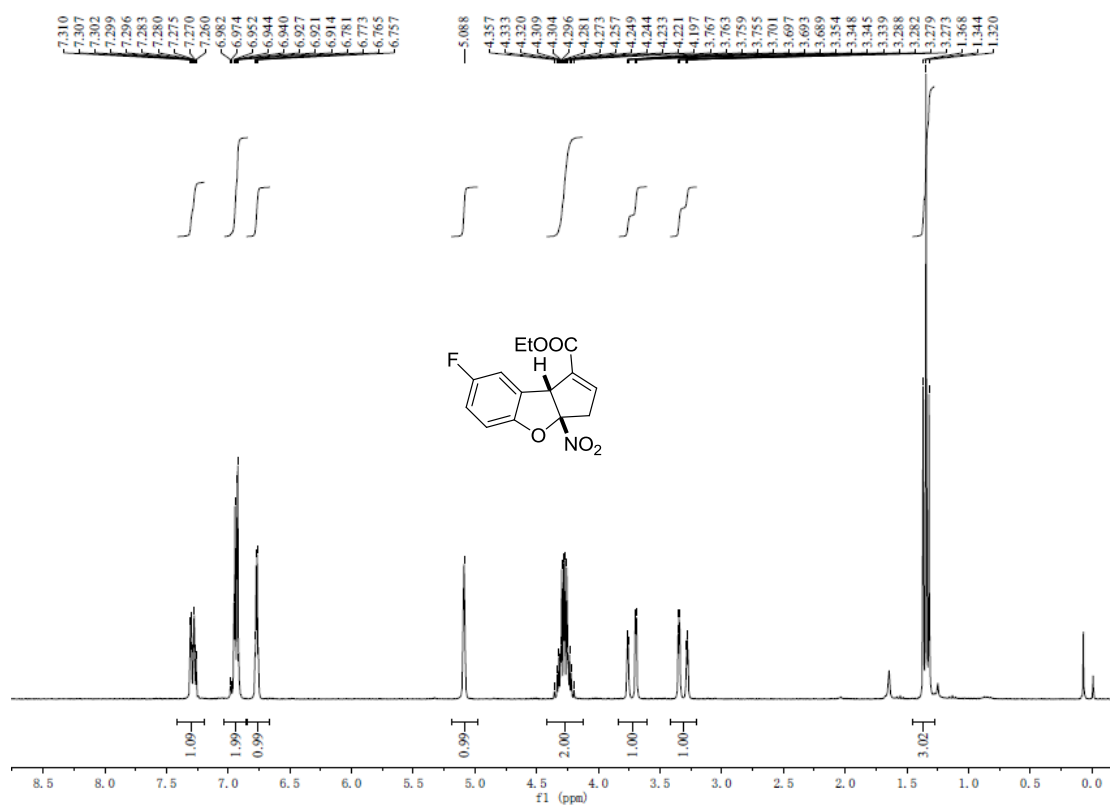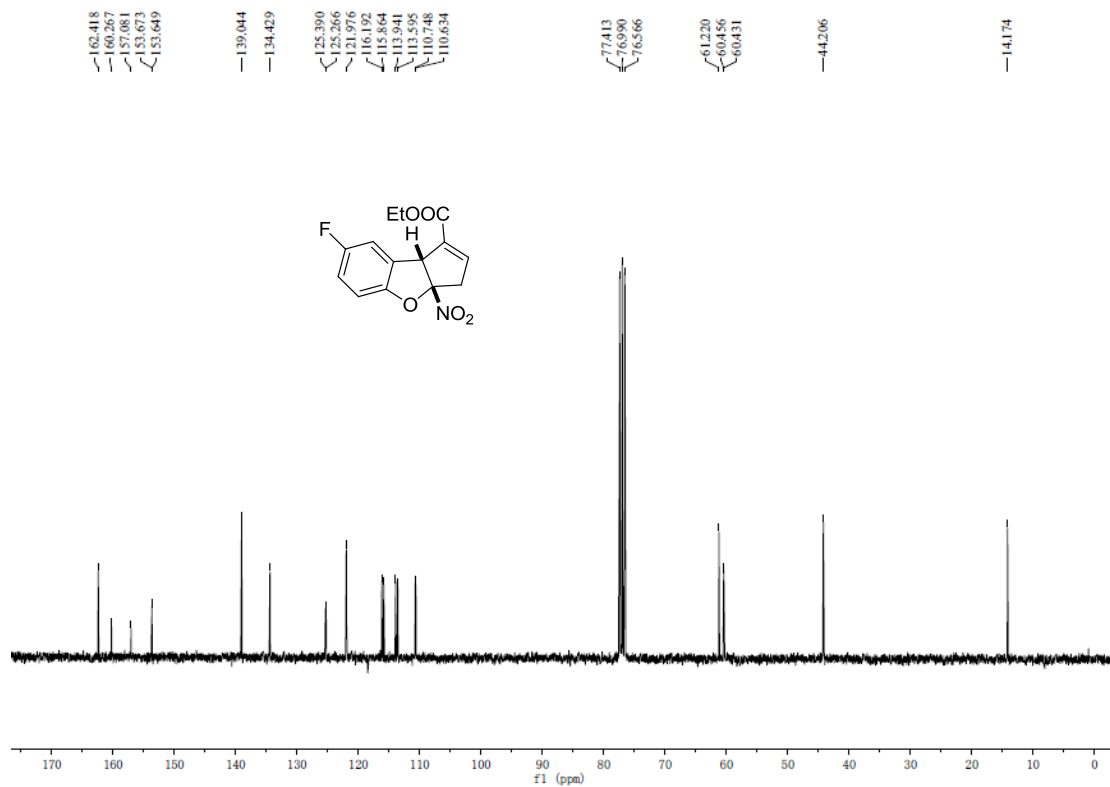

$^1\text{H}$  and  $^{13}\text{C}$  NMR of **3c**

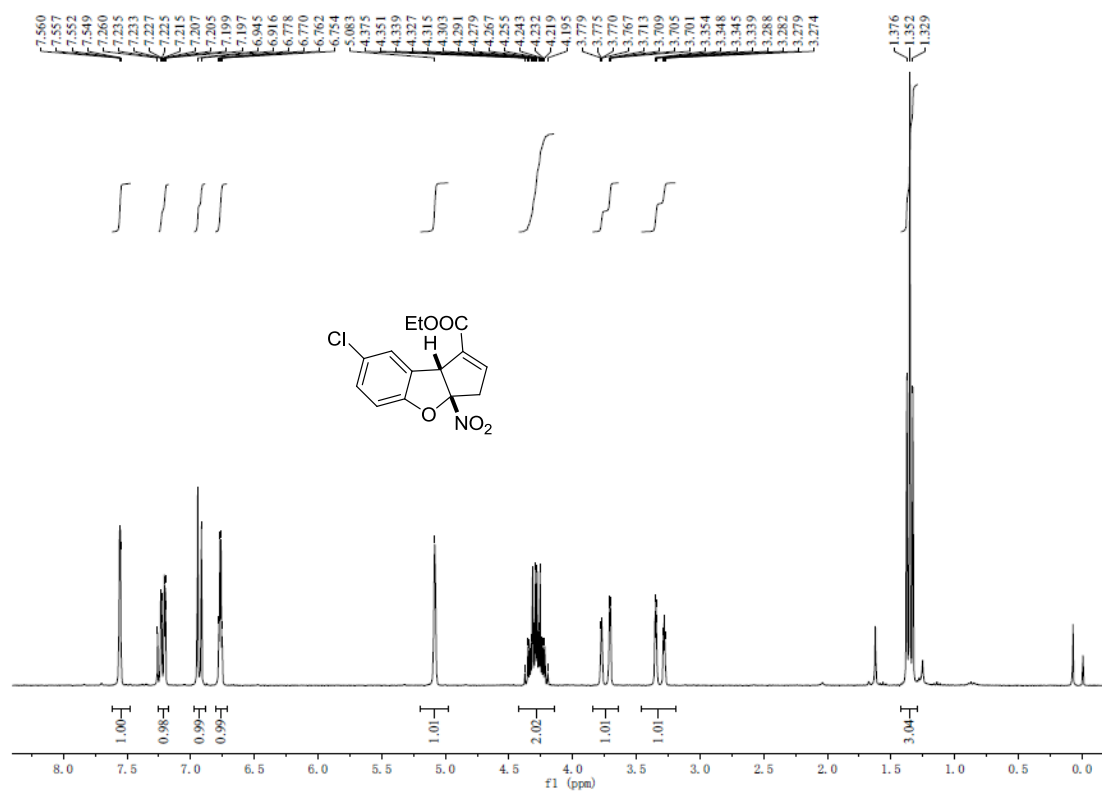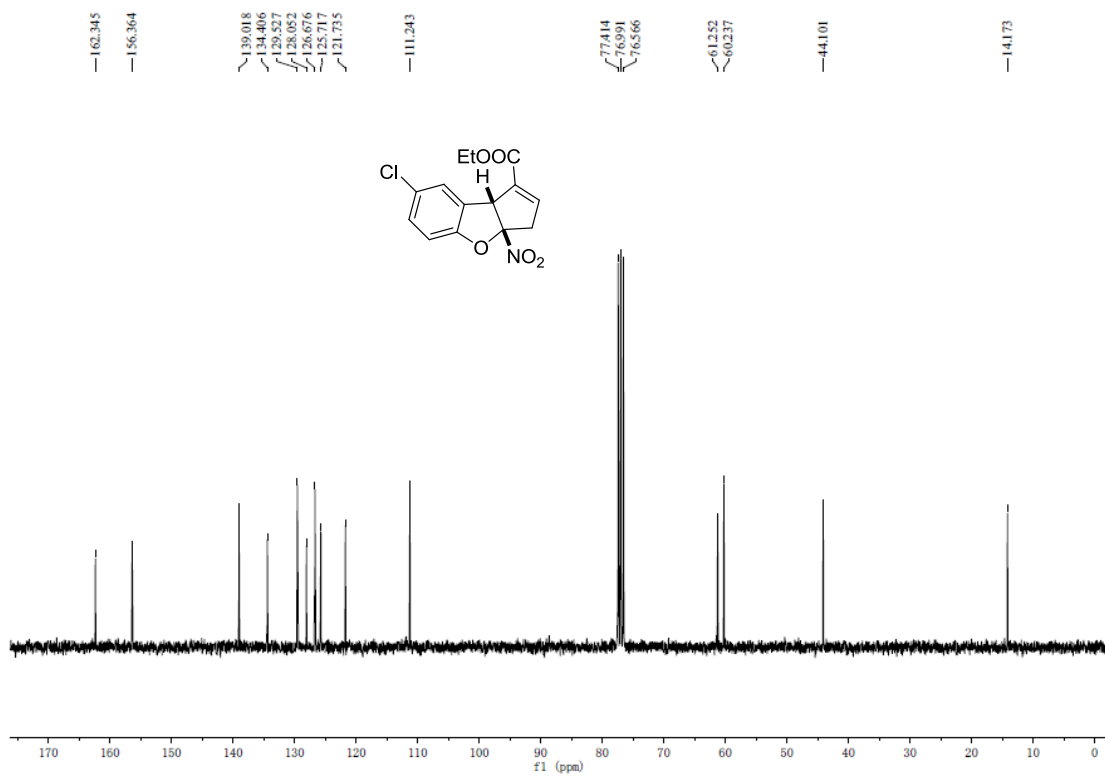

$^1\text{H}$  and  $^{13}\text{C}$  NMR of **3d**

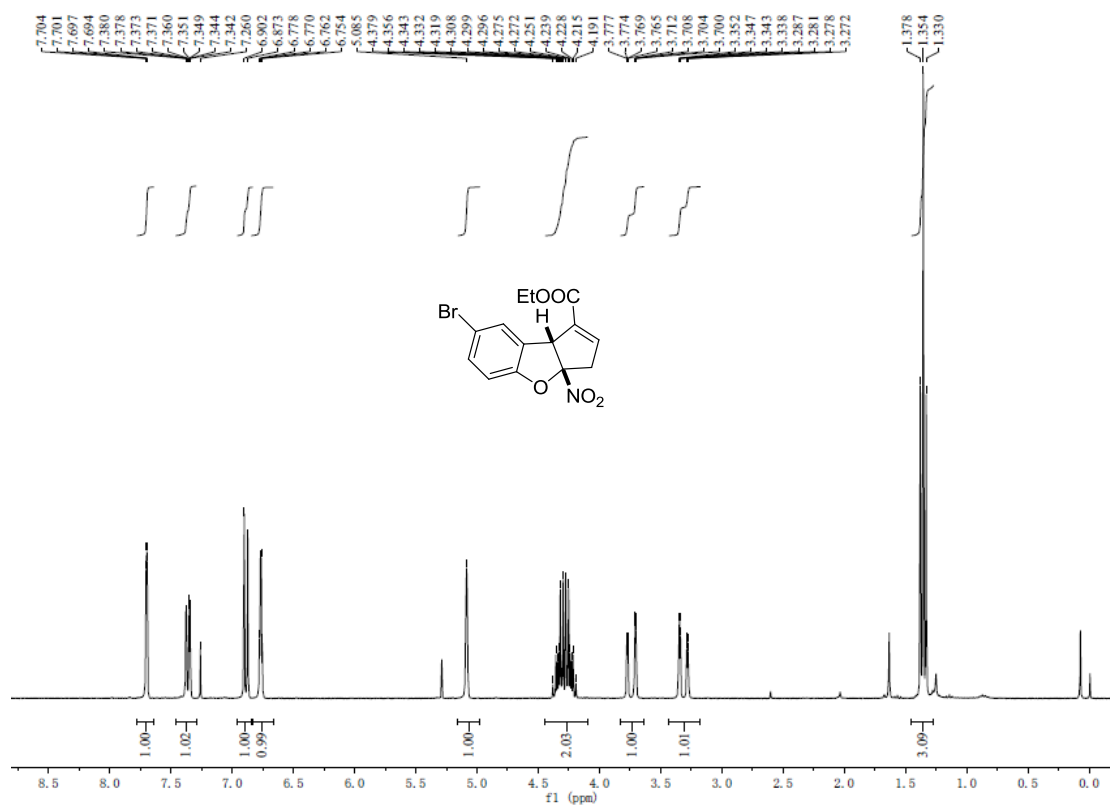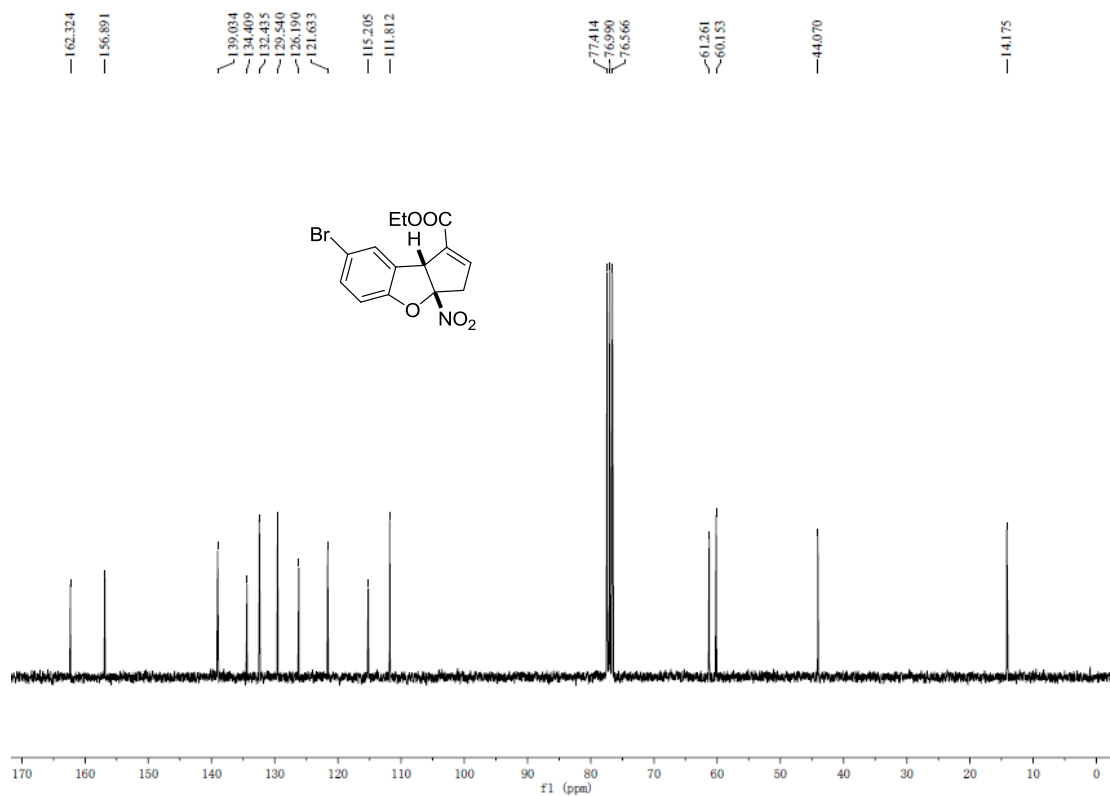

# $^1\text{H}$ and $^{13}\text{C}$ NMR of **3e**

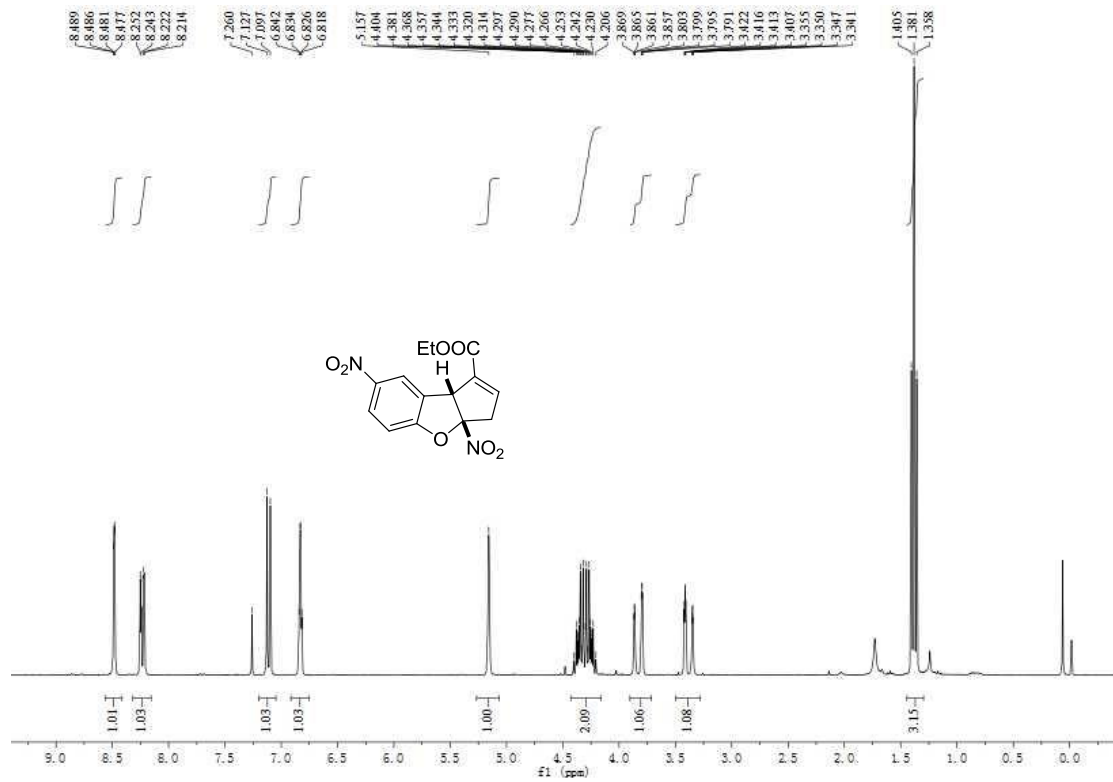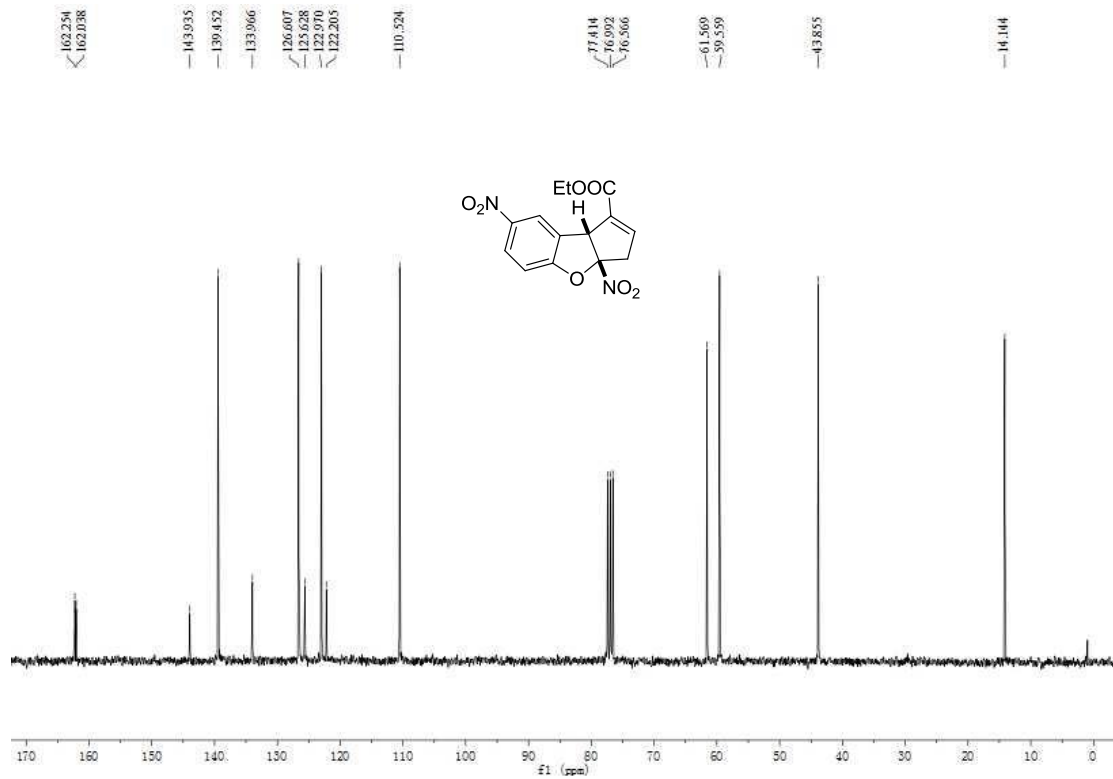

$^1\text{H}$  and  $^{13}\text{C}$  NMR of **3f**

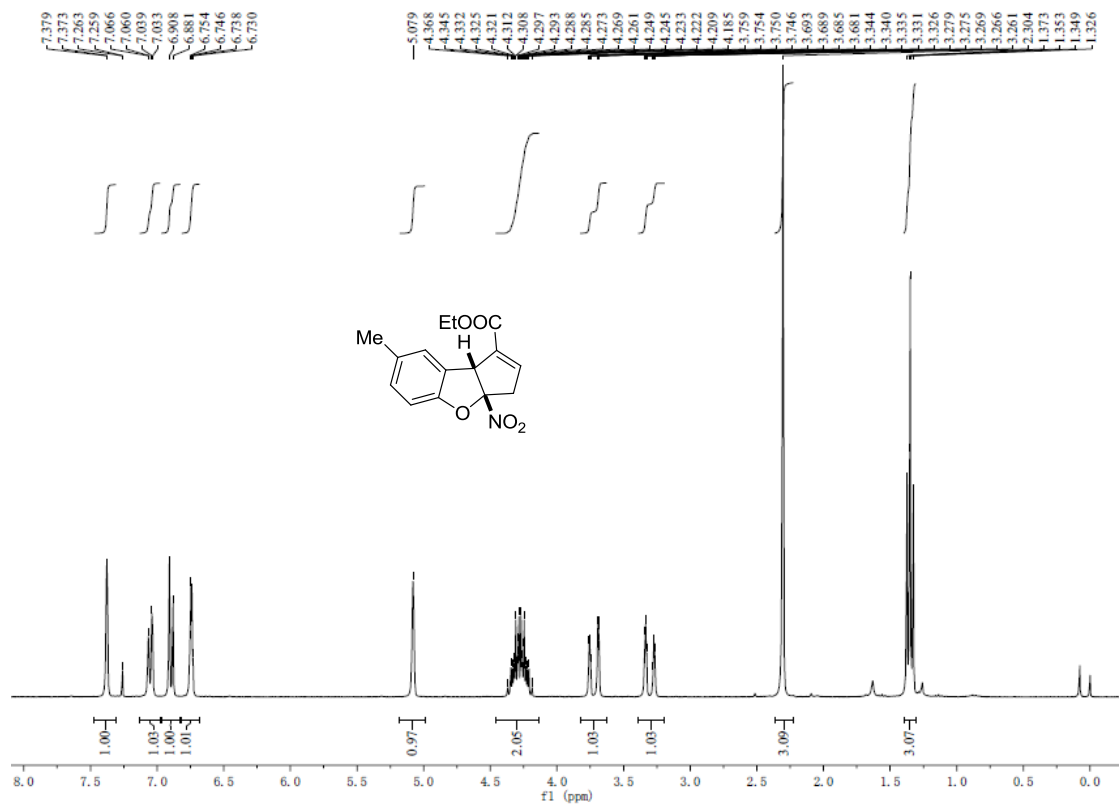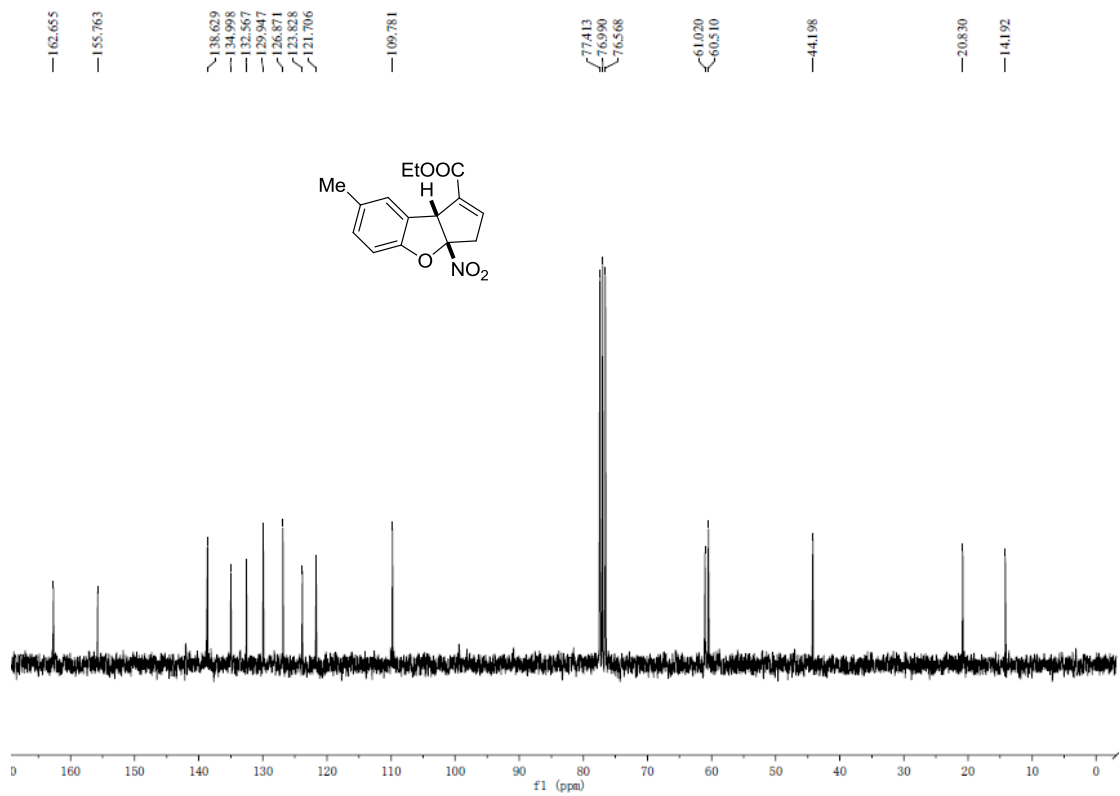



$^1\text{H}$  and  $^{13}\text{C}$  NMR of **3g**

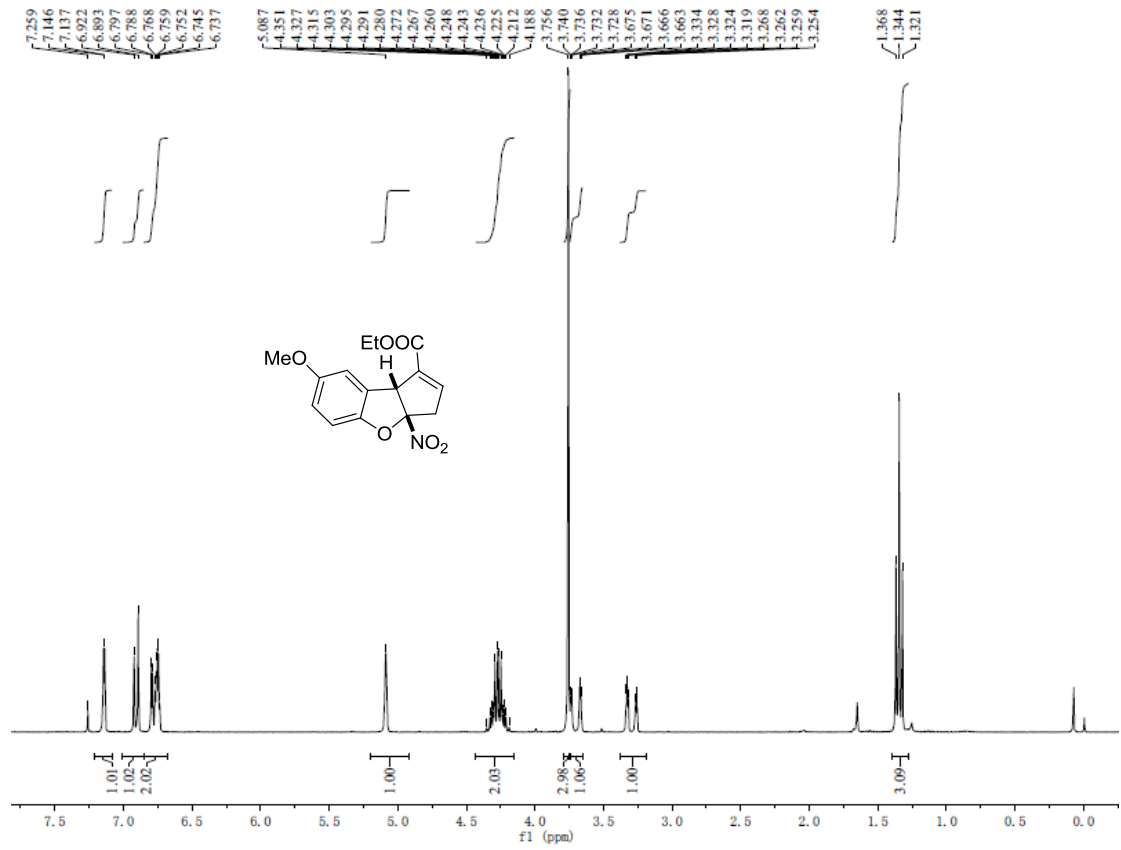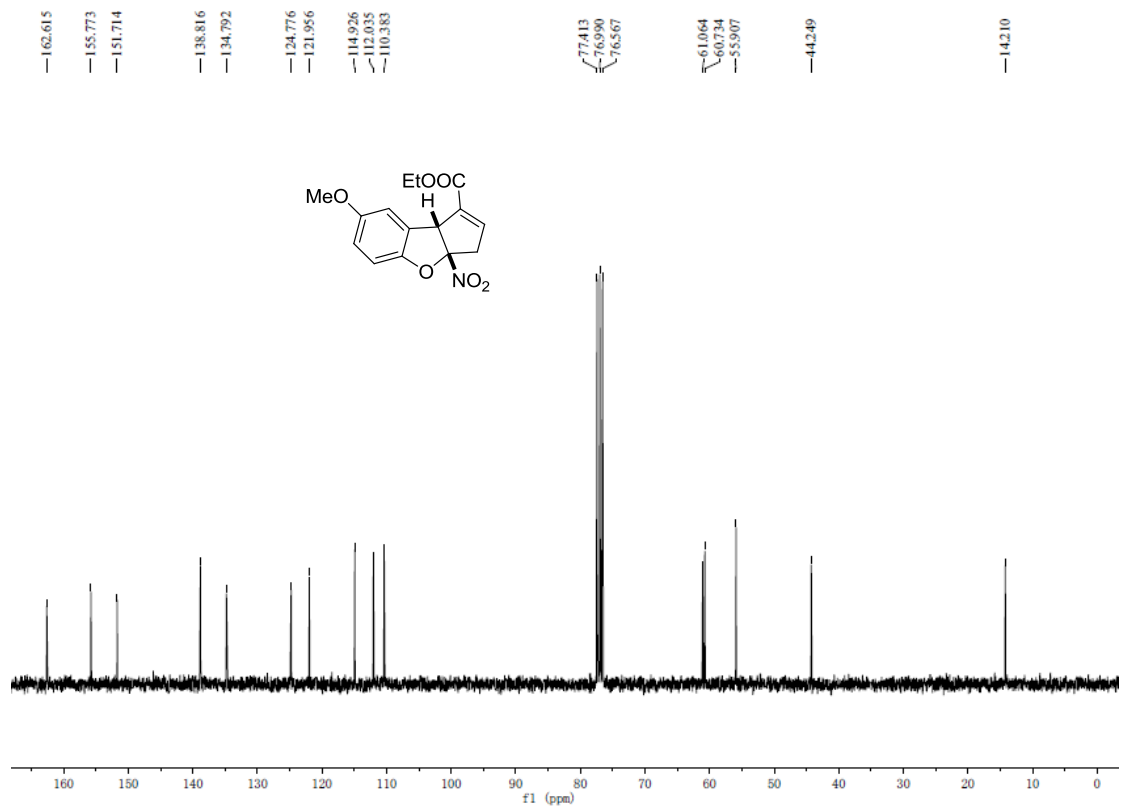

# $^1\text{H}$ and $^{13}\text{C}$ NMR of **3h**

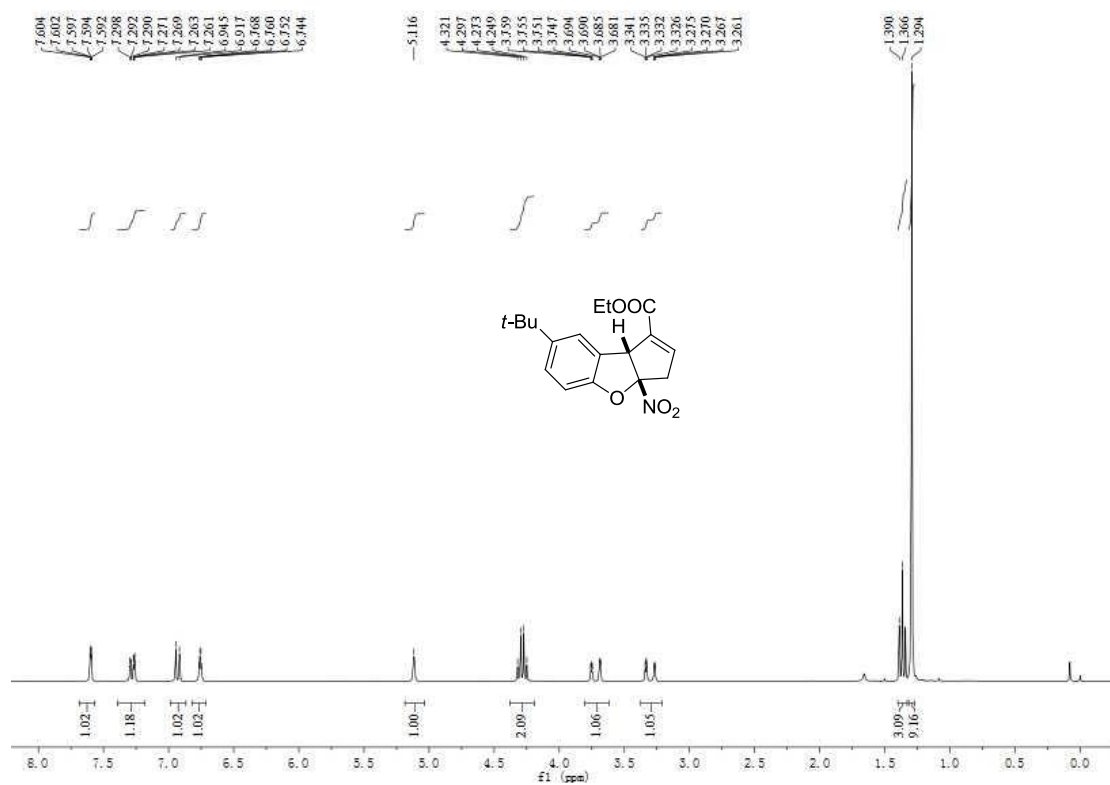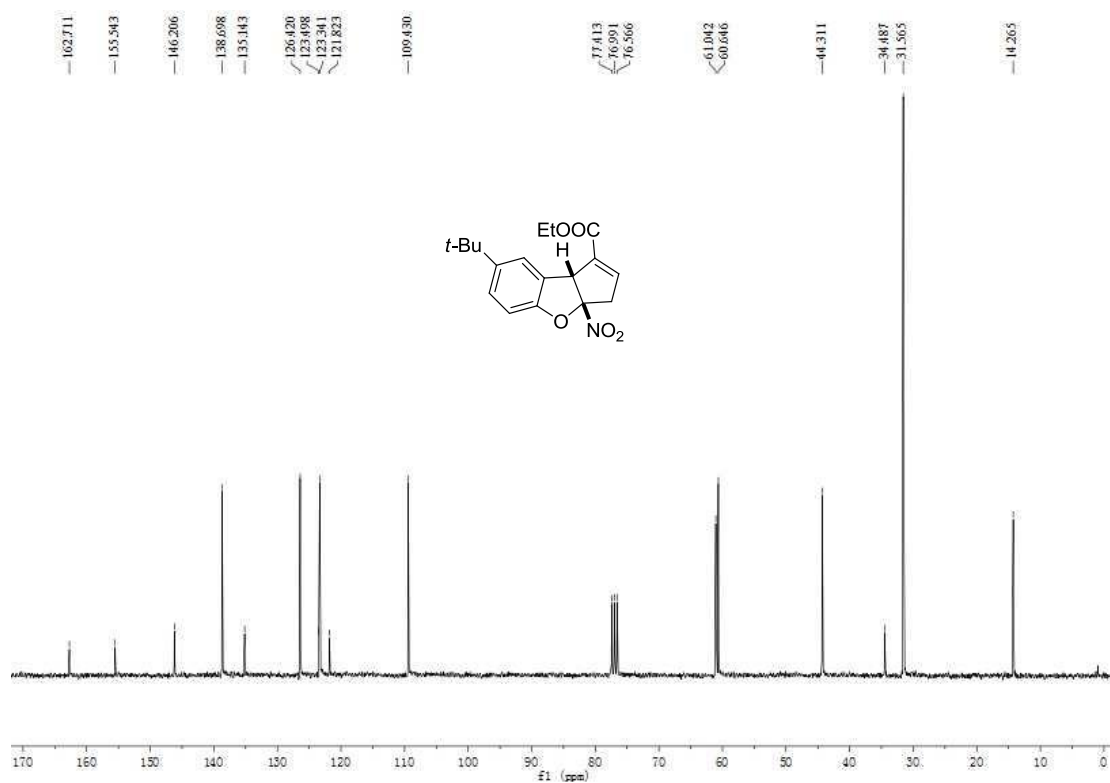

$^1\text{H}$  and  $^{13}\text{C}$  NMR of **3i**

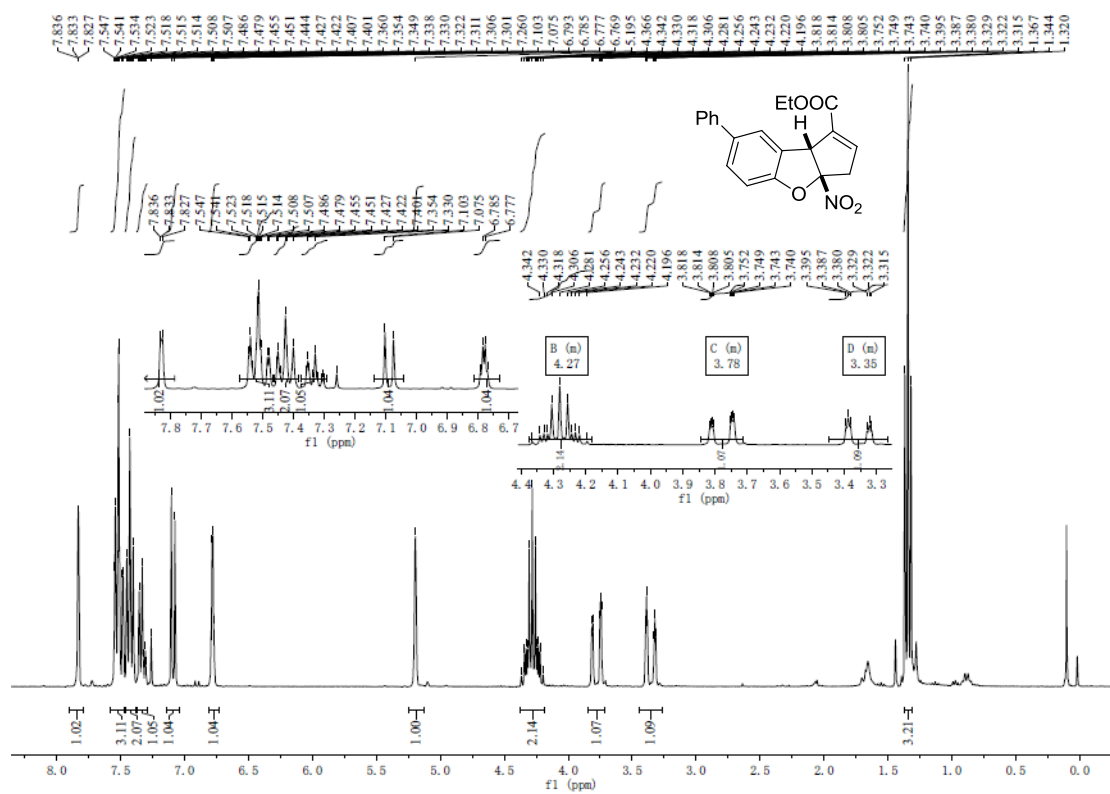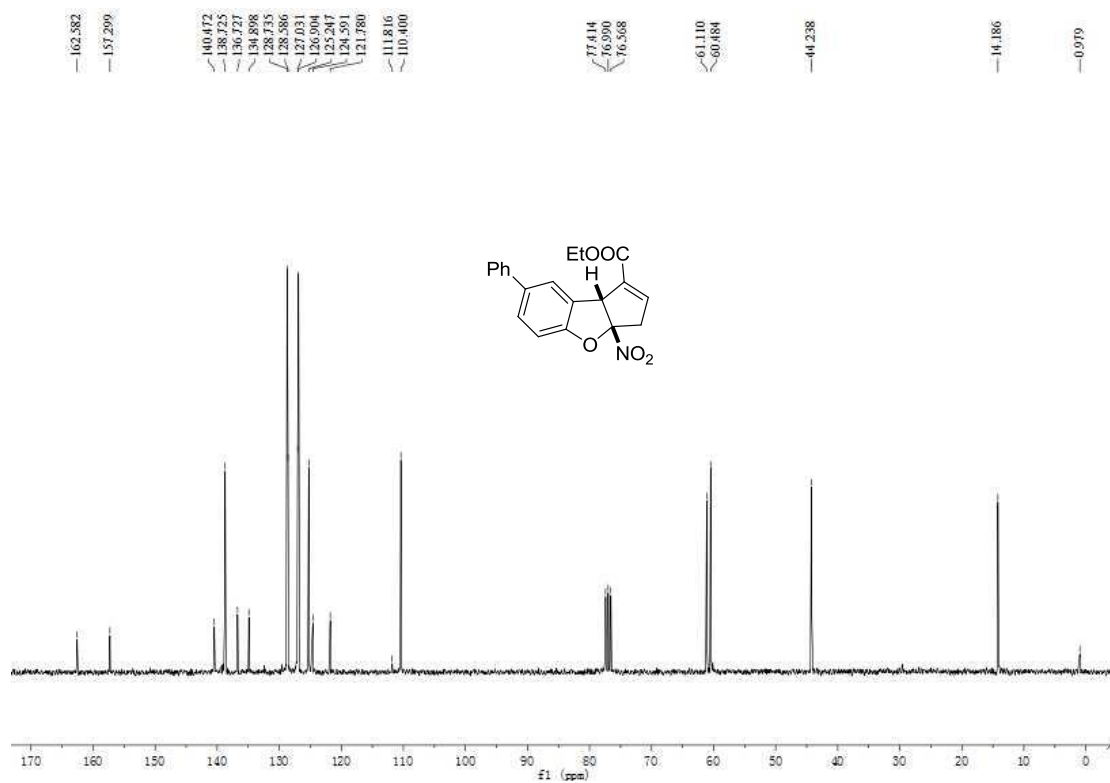

# $^1\text{H}$ and $^{13}\text{C}$ NMR of **3j**

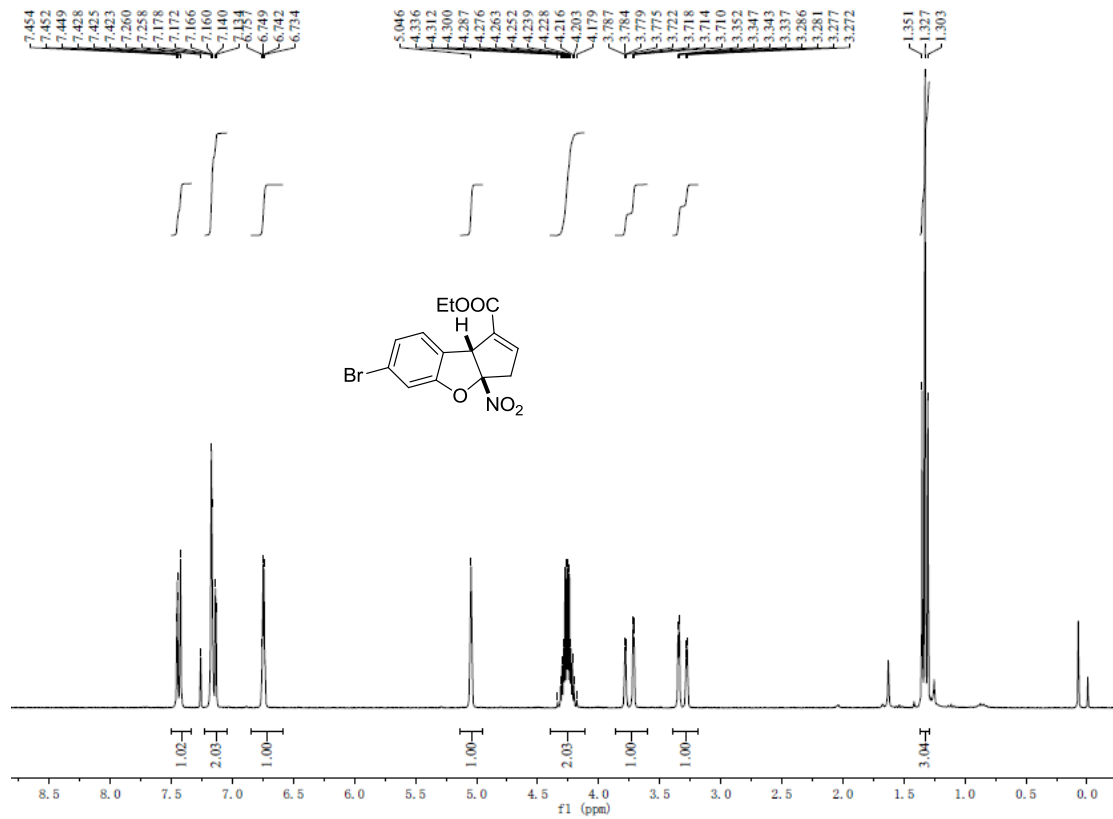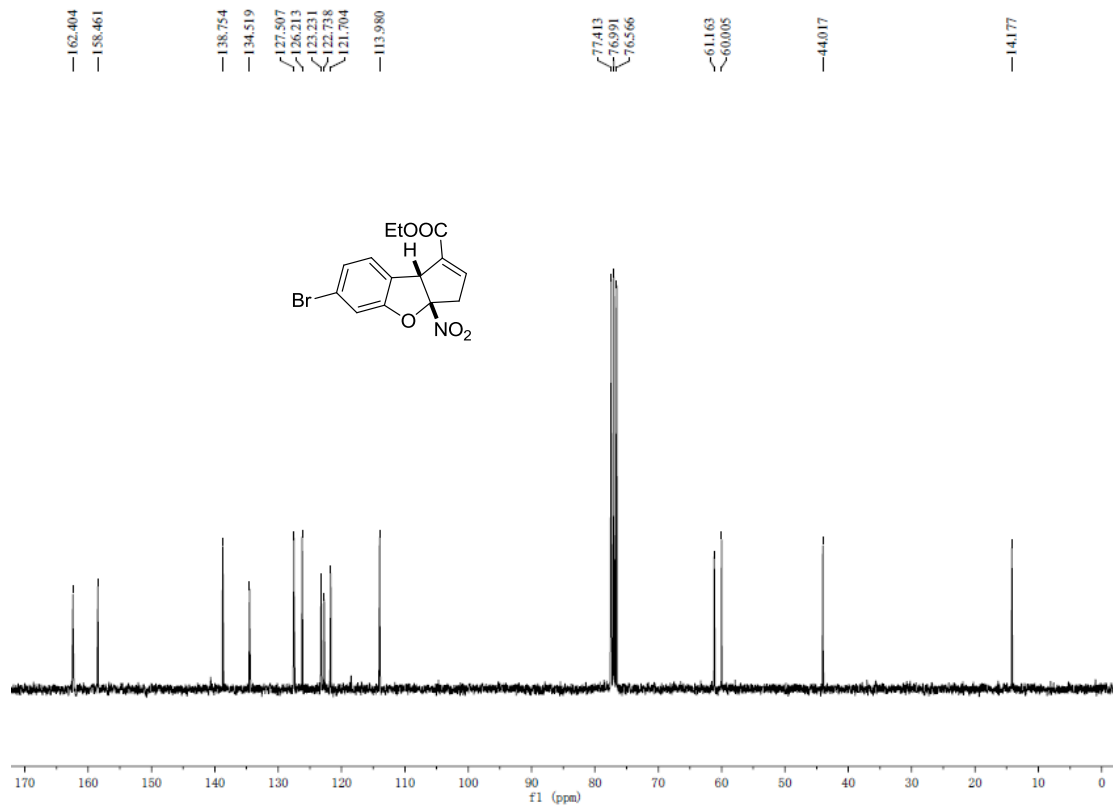

<sup>1</sup>H and <sup>13</sup>C NMR of **3k**

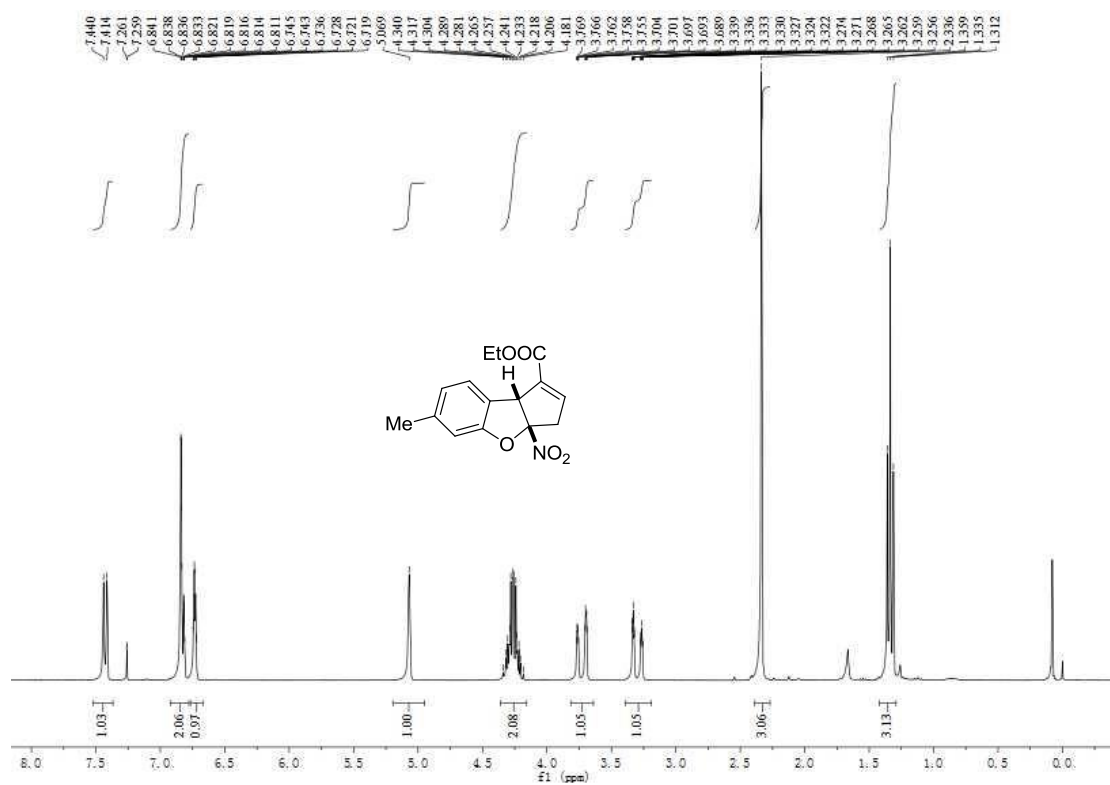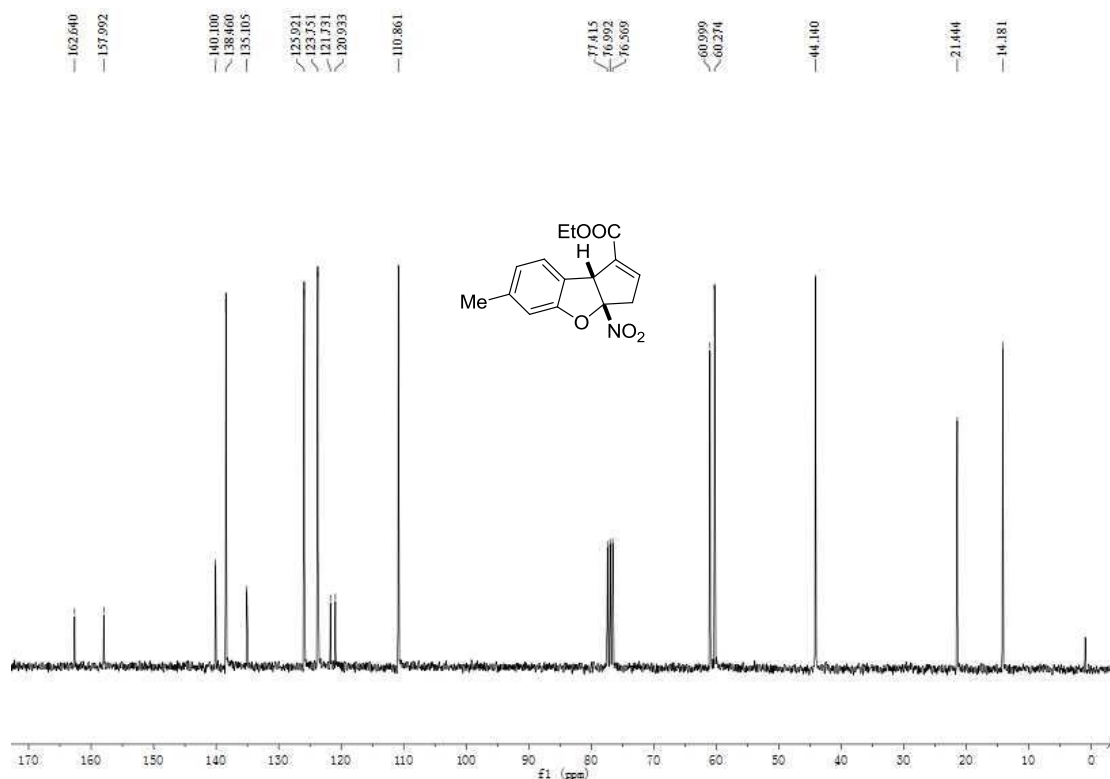

# $^1\text{H}$ and $^{13}\text{C}$ NMR of **31**

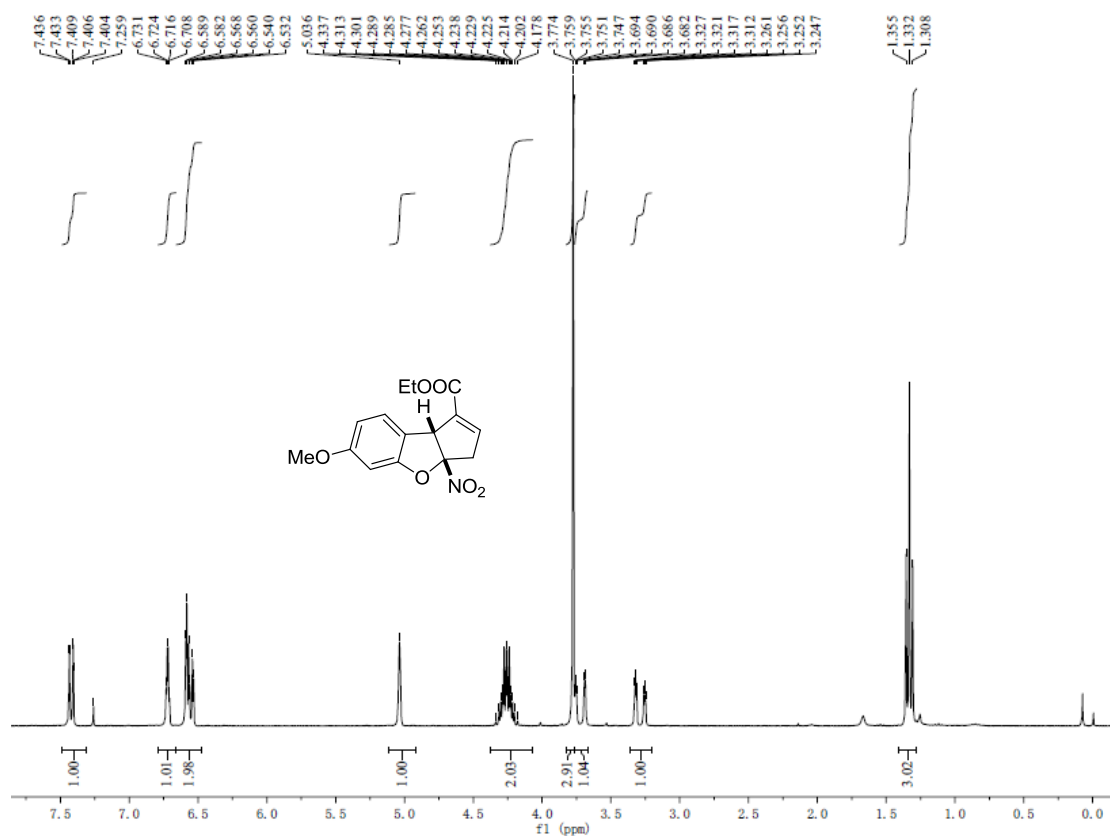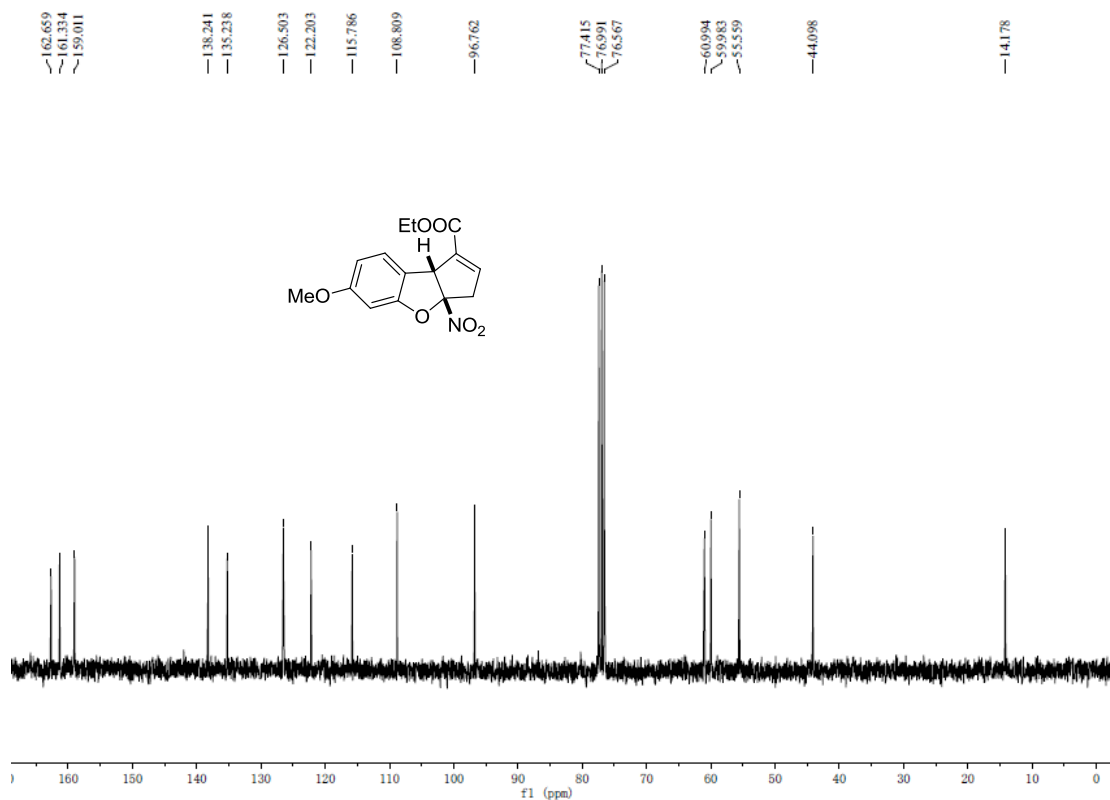

# $^1\text{H}$ and $^{13}\text{C}$ NMR of **3m**

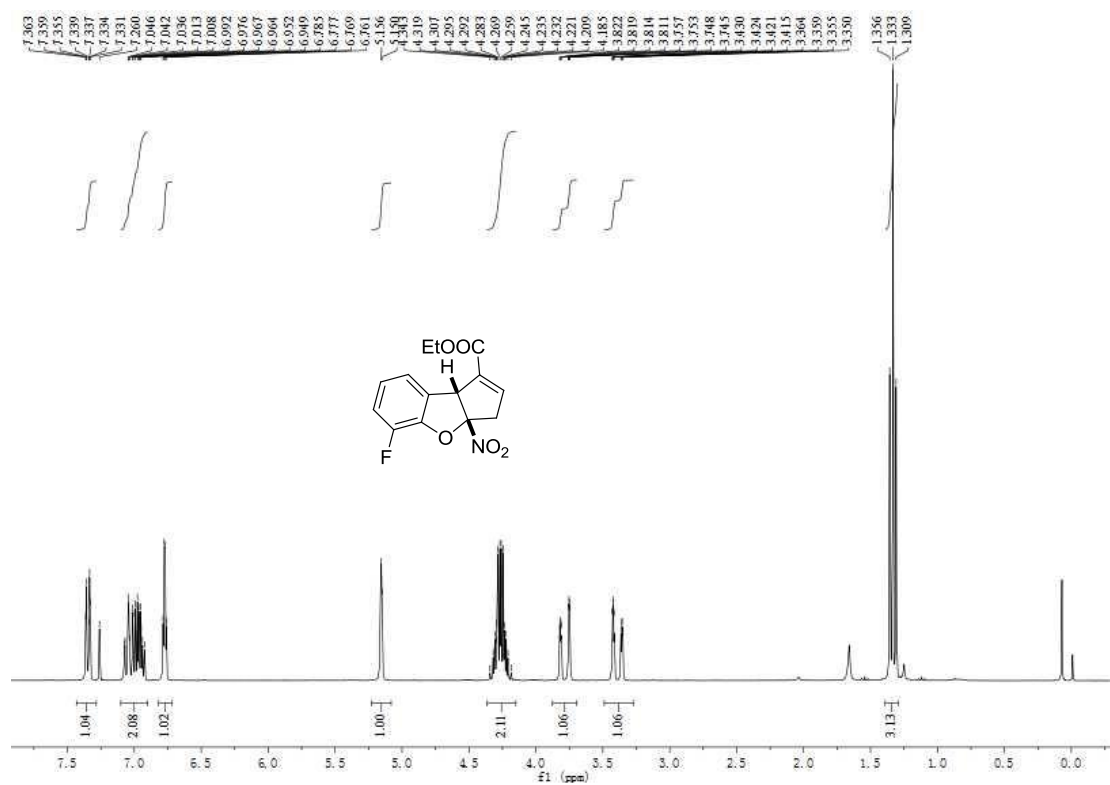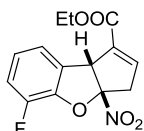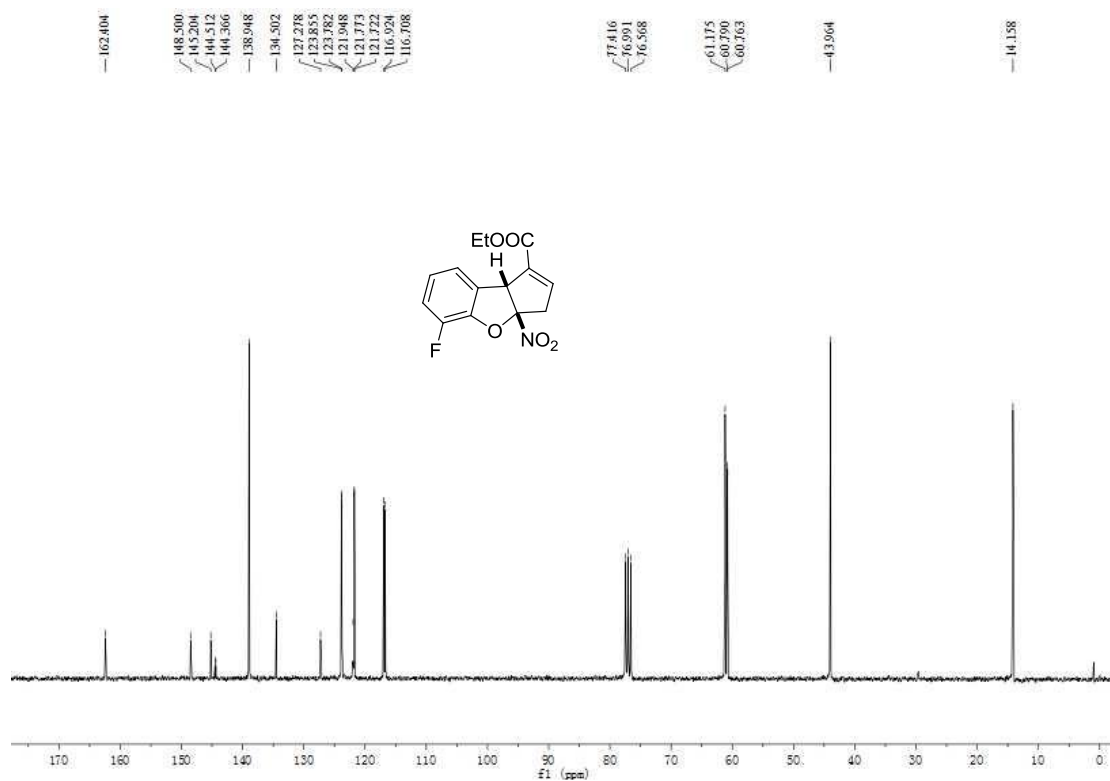

$^1\text{H}$  and  $^{13}\text{C}$  NMR of **3n**

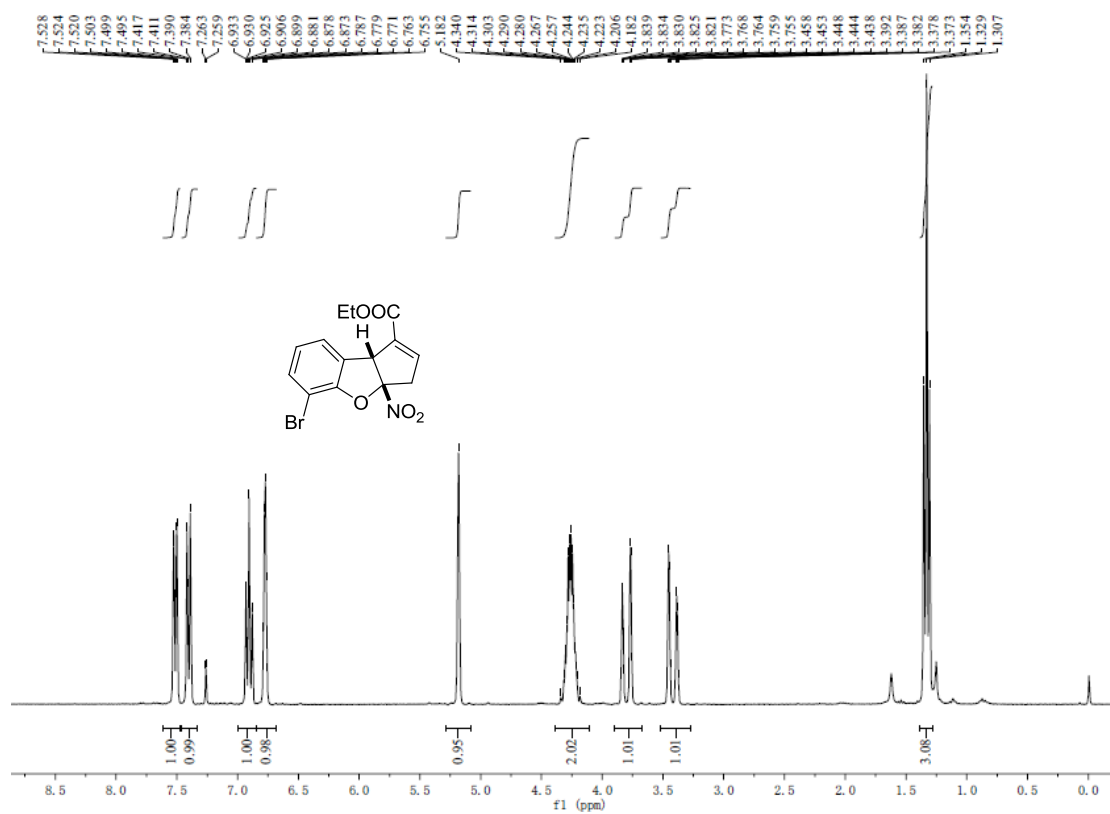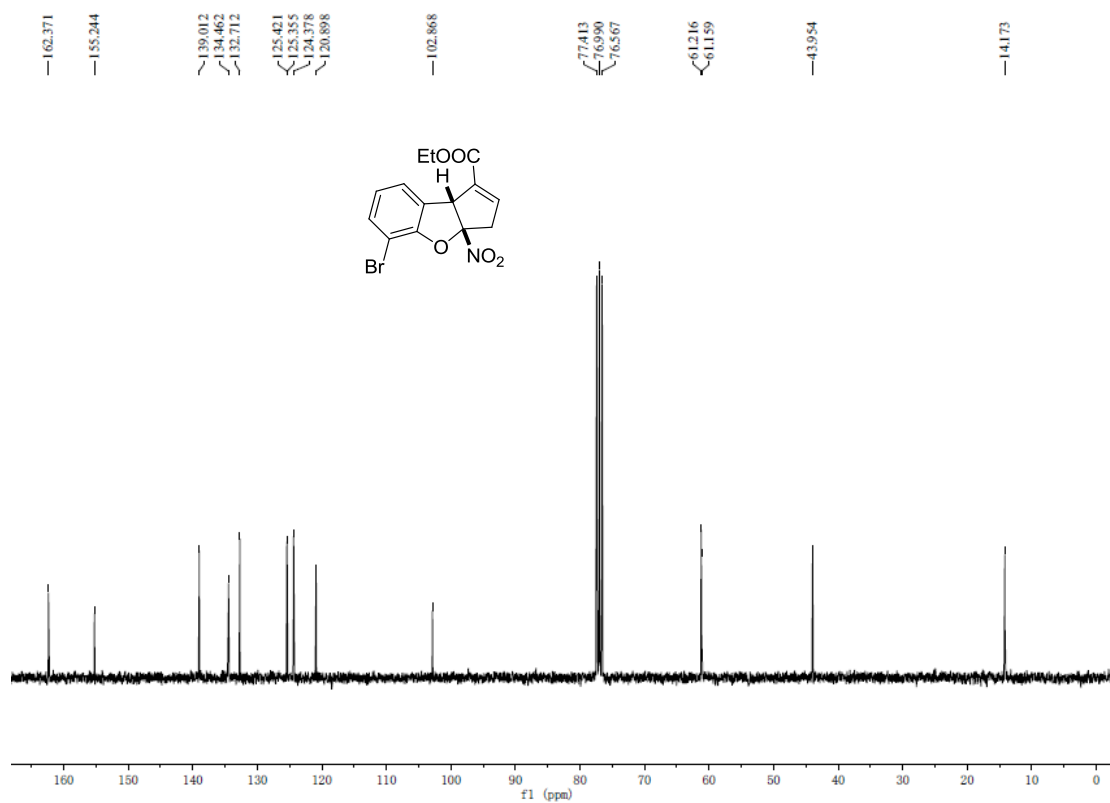



# $^1\text{H}$ and $^{13}\text{C}$ NMR of **30**

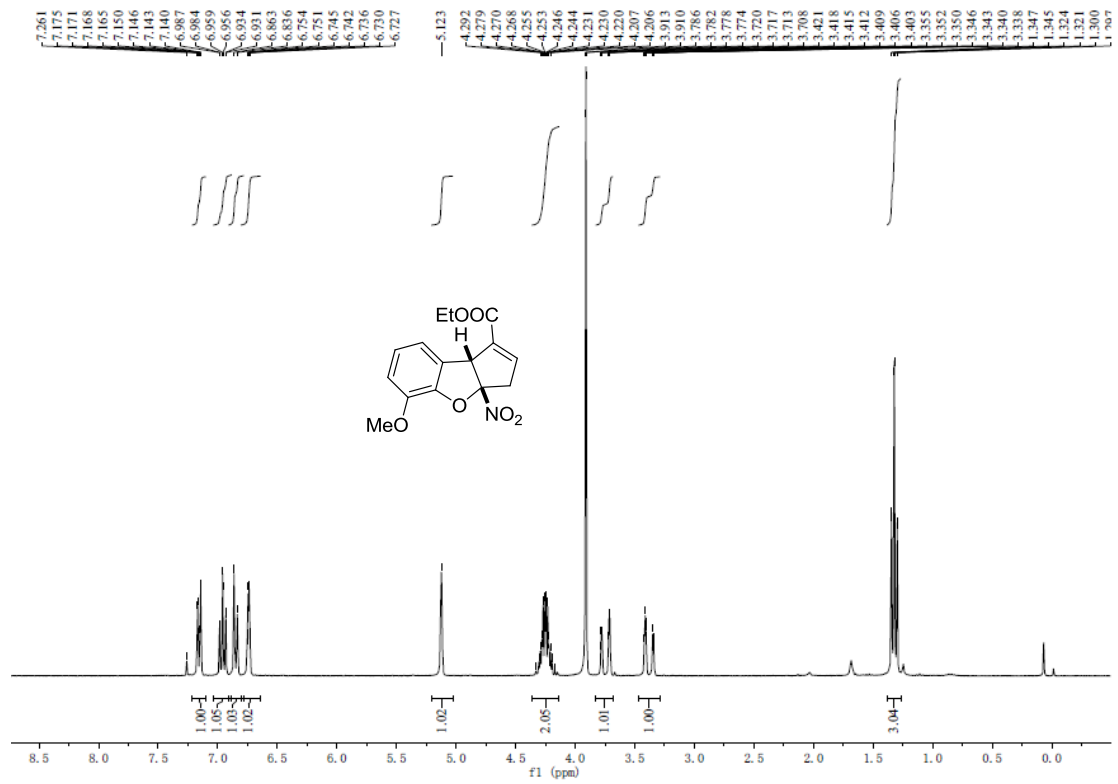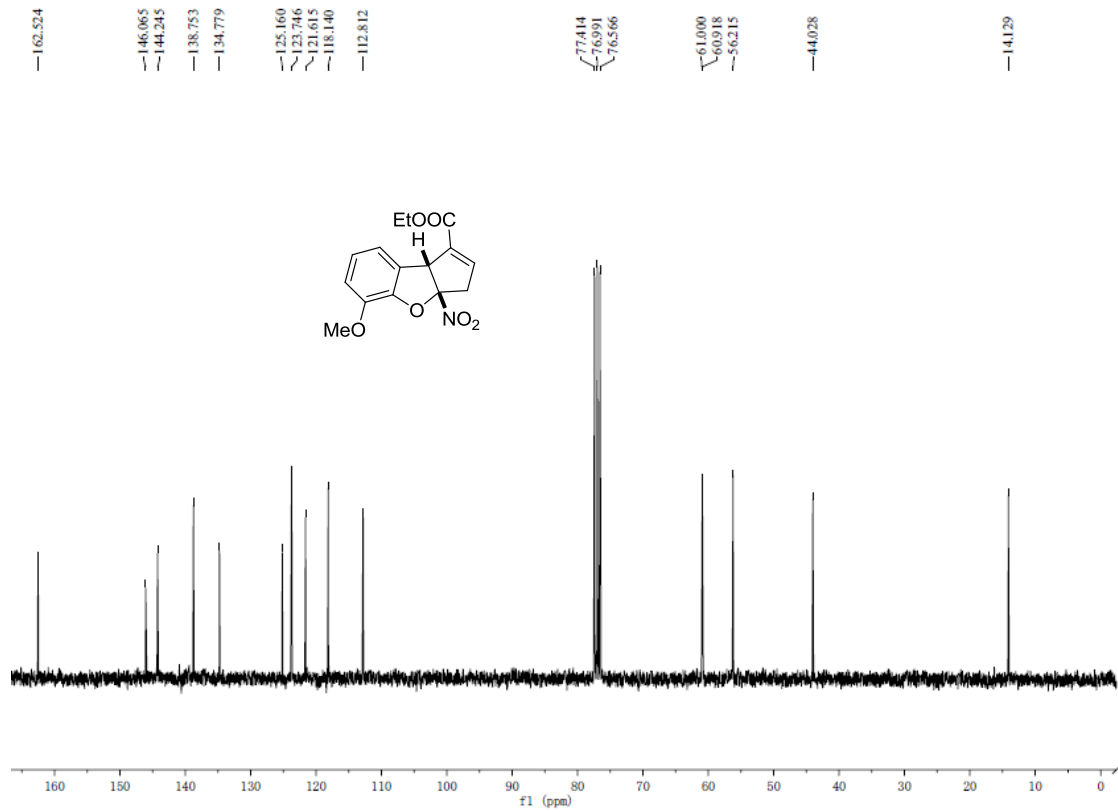

$^1\text{H}$  and  $^{13}\text{C}$  NMR of **3p**

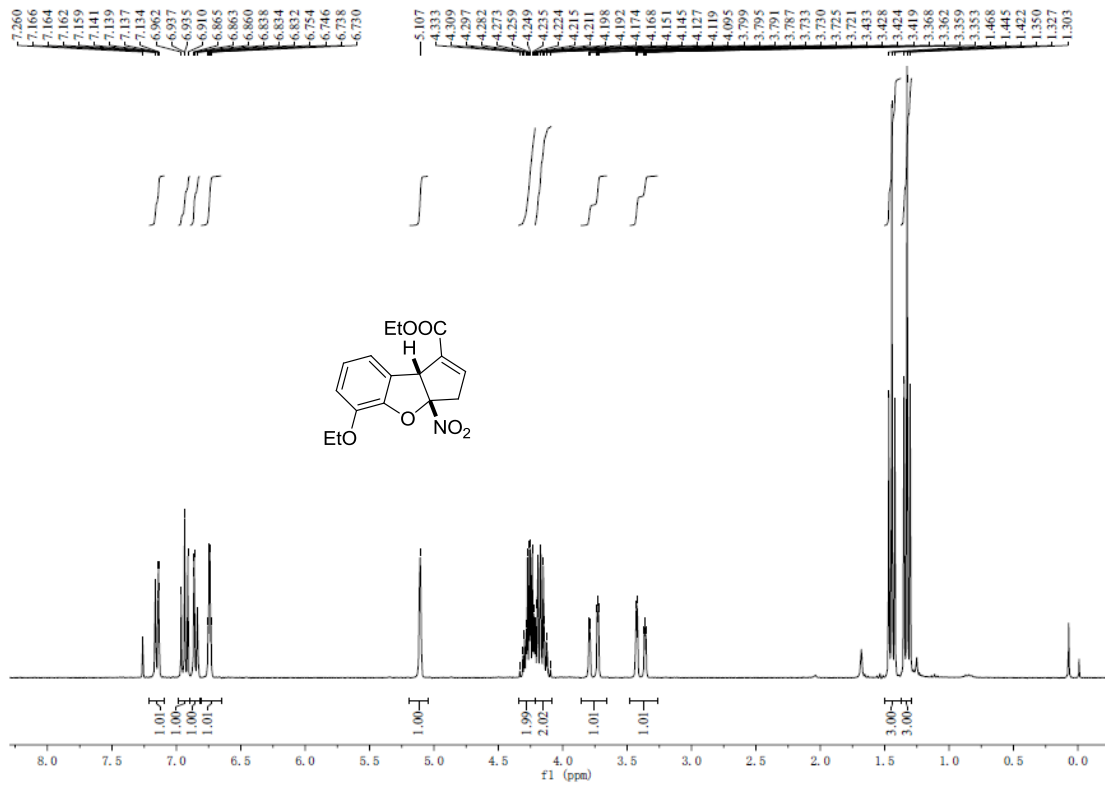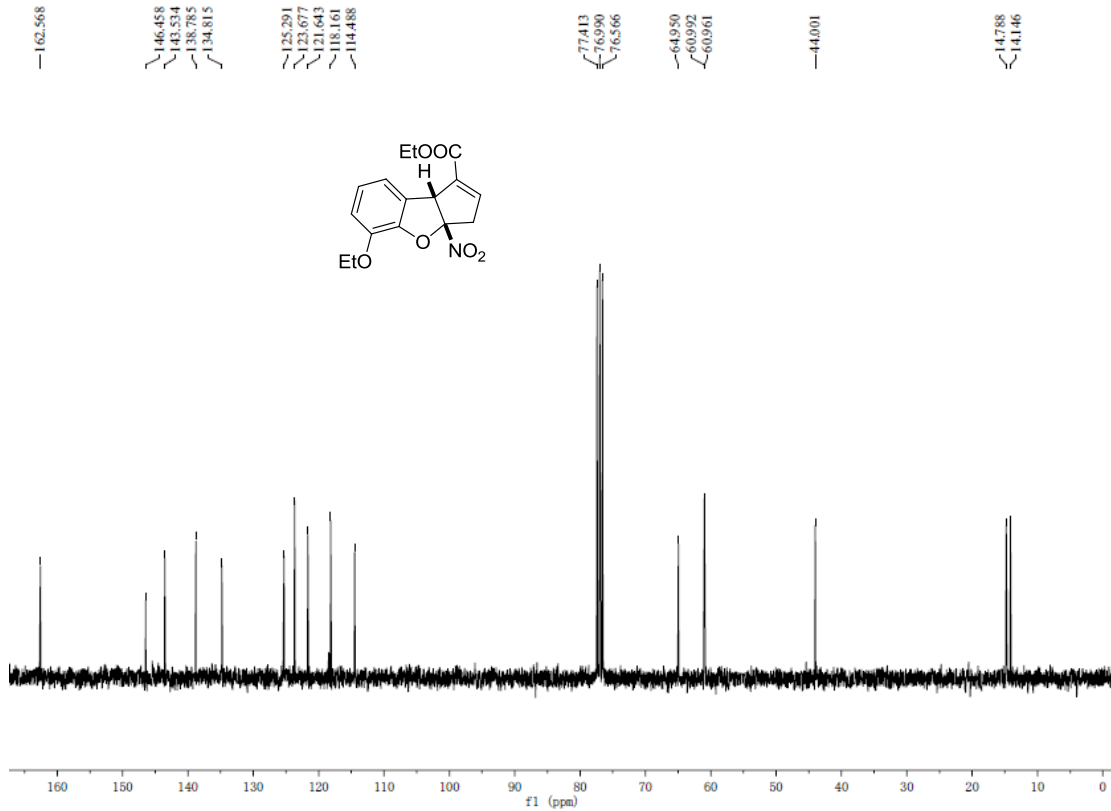

# $^1\text{H}$ and $^{13}\text{C}$ NMR of **3q**

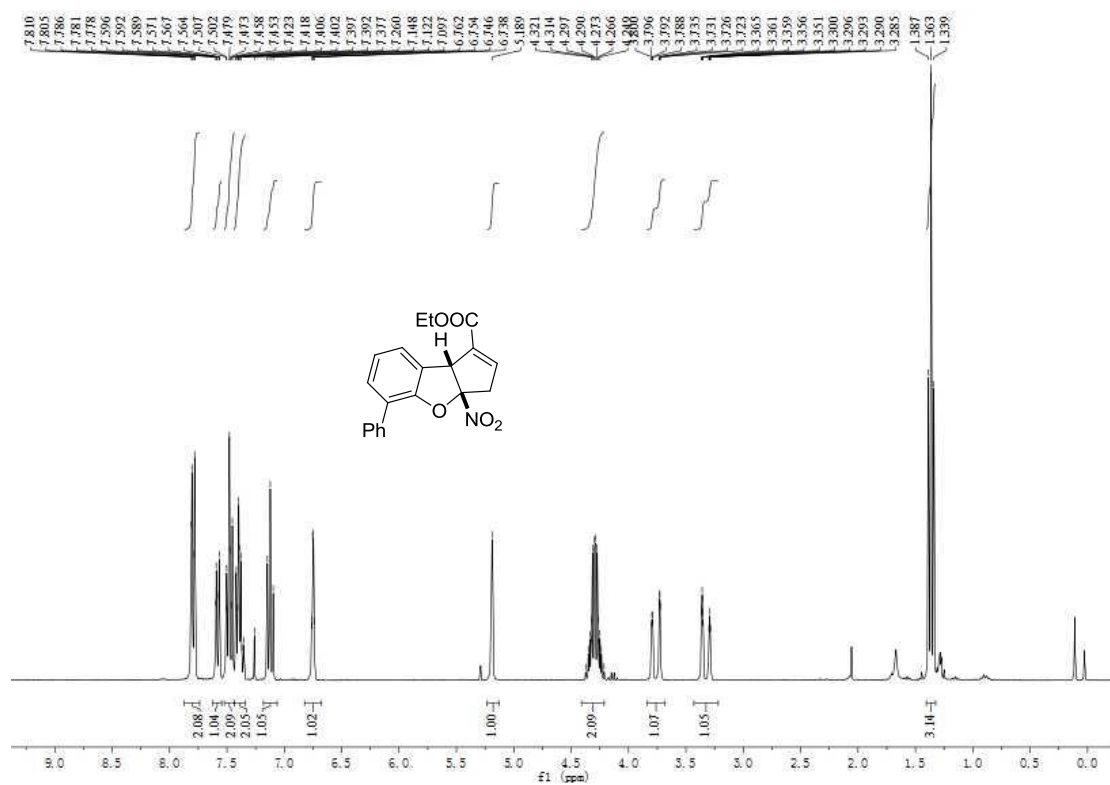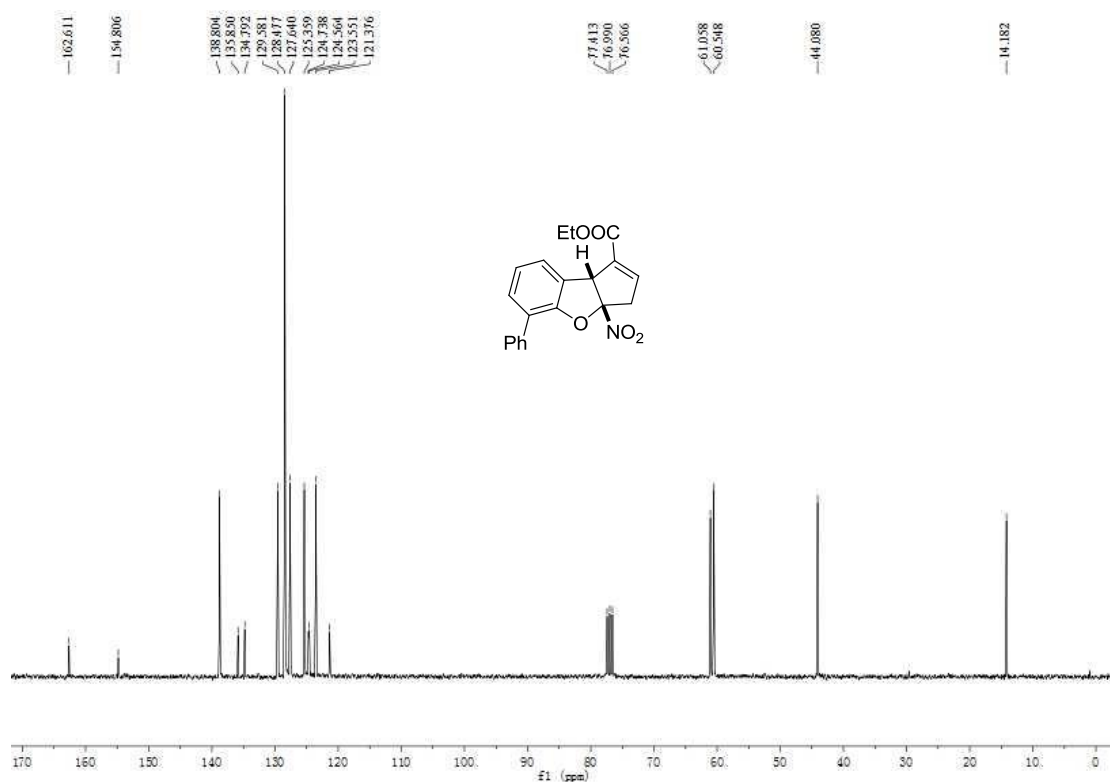

# $^1\text{H}$ and $^{13}\text{C}$ NMR of **3r**

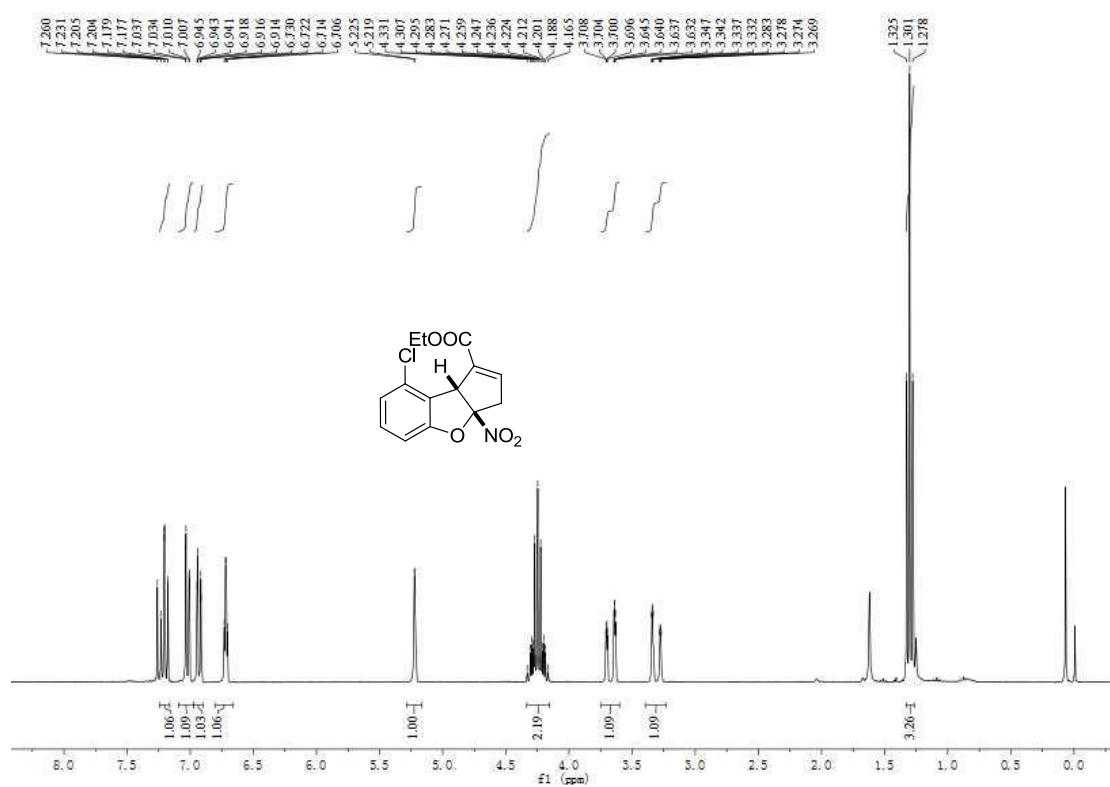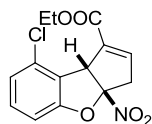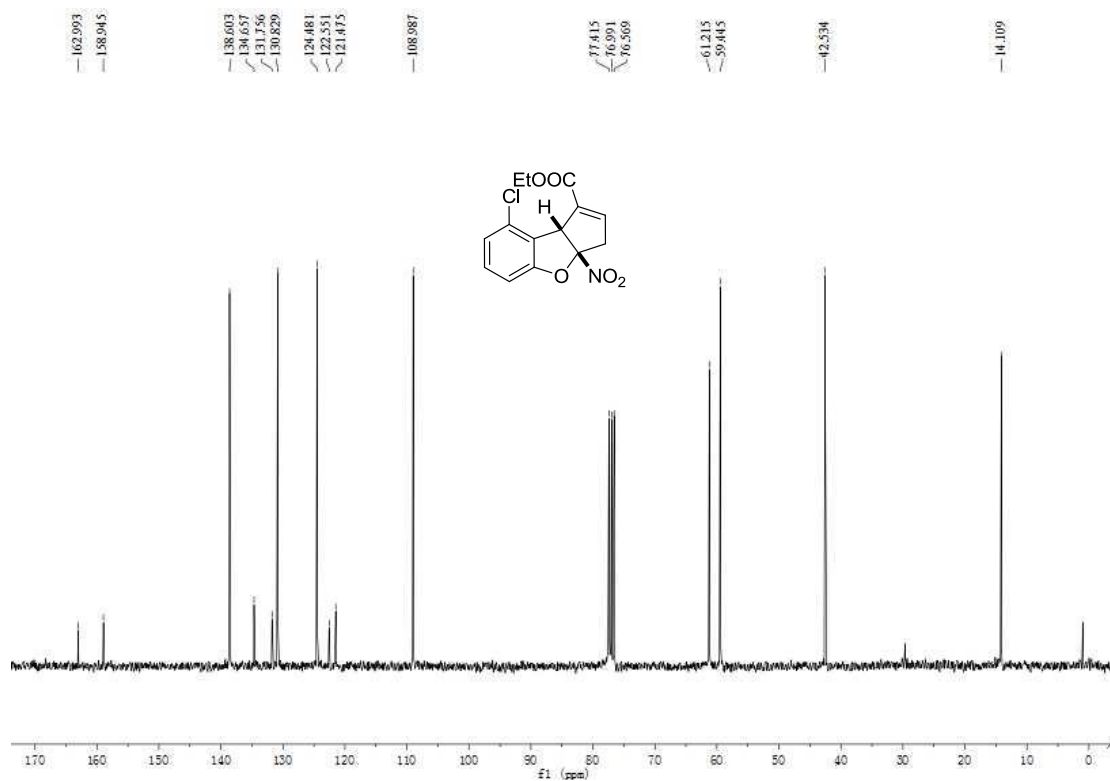

# $^1\text{H}$ and $^{13}\text{C}$ NMR of 3s

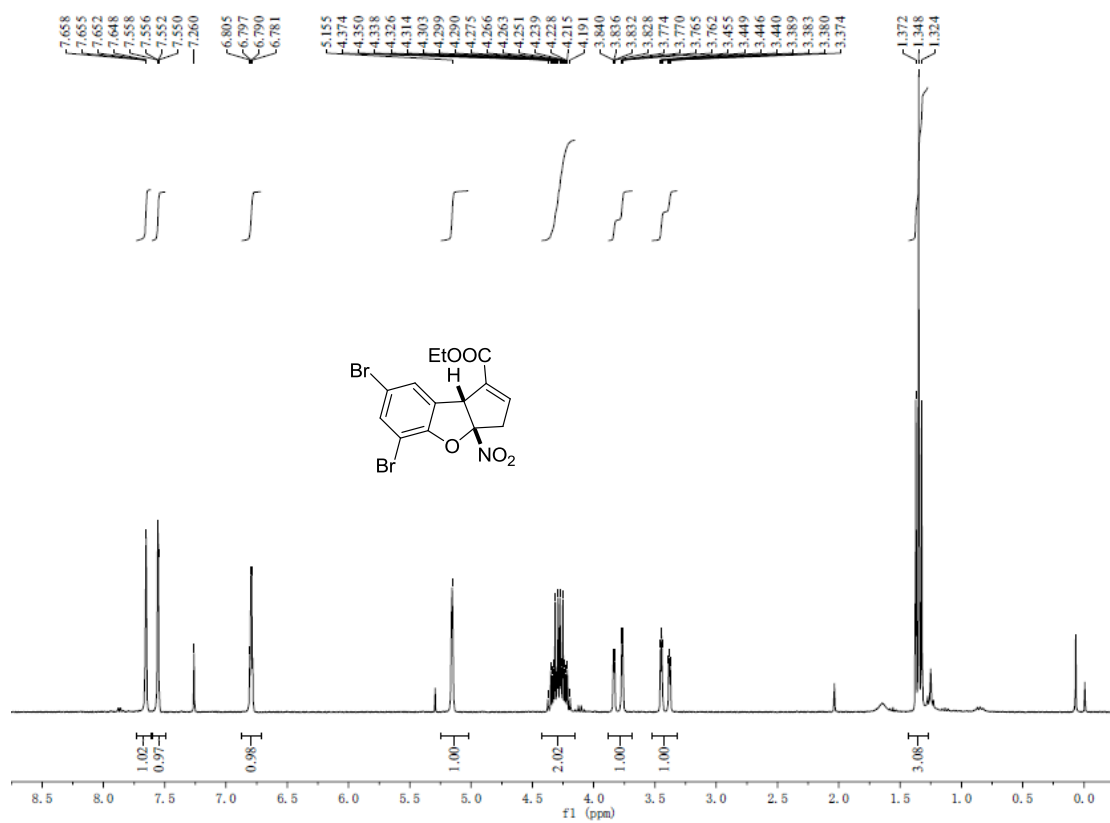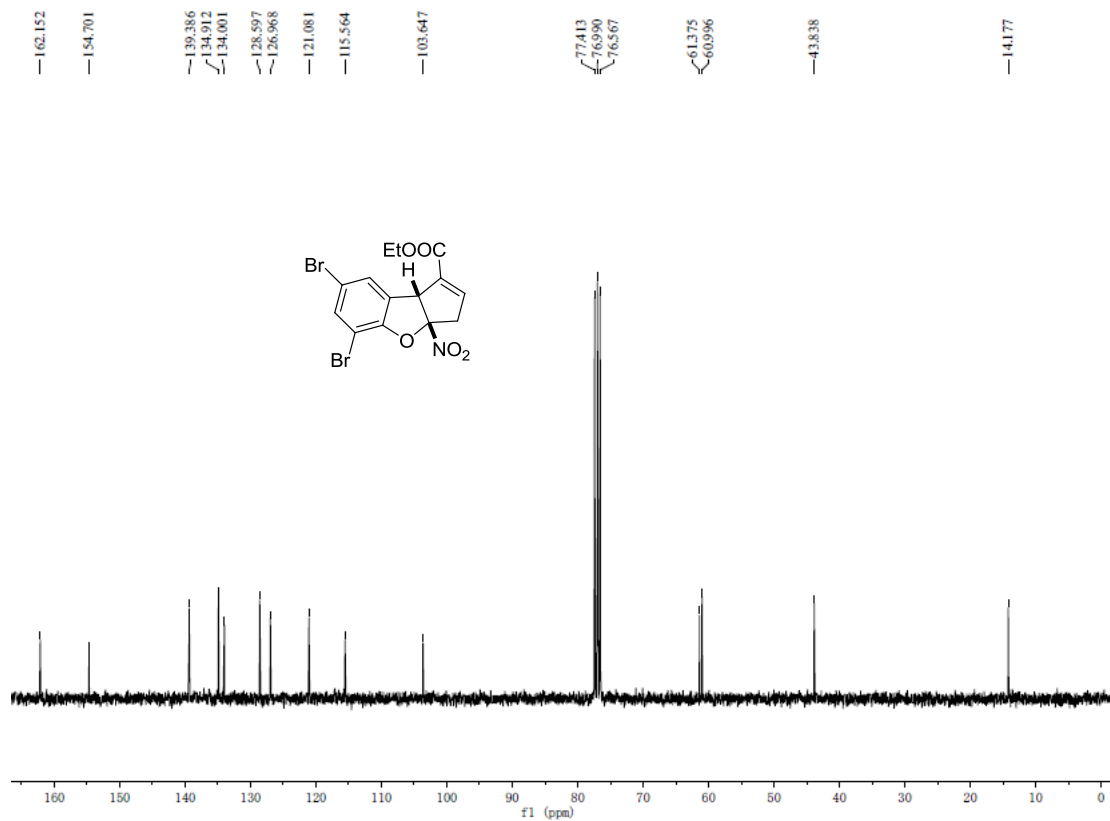

$^1\text{H}$  and  $^{13}\text{C}$  NMR of **3t**

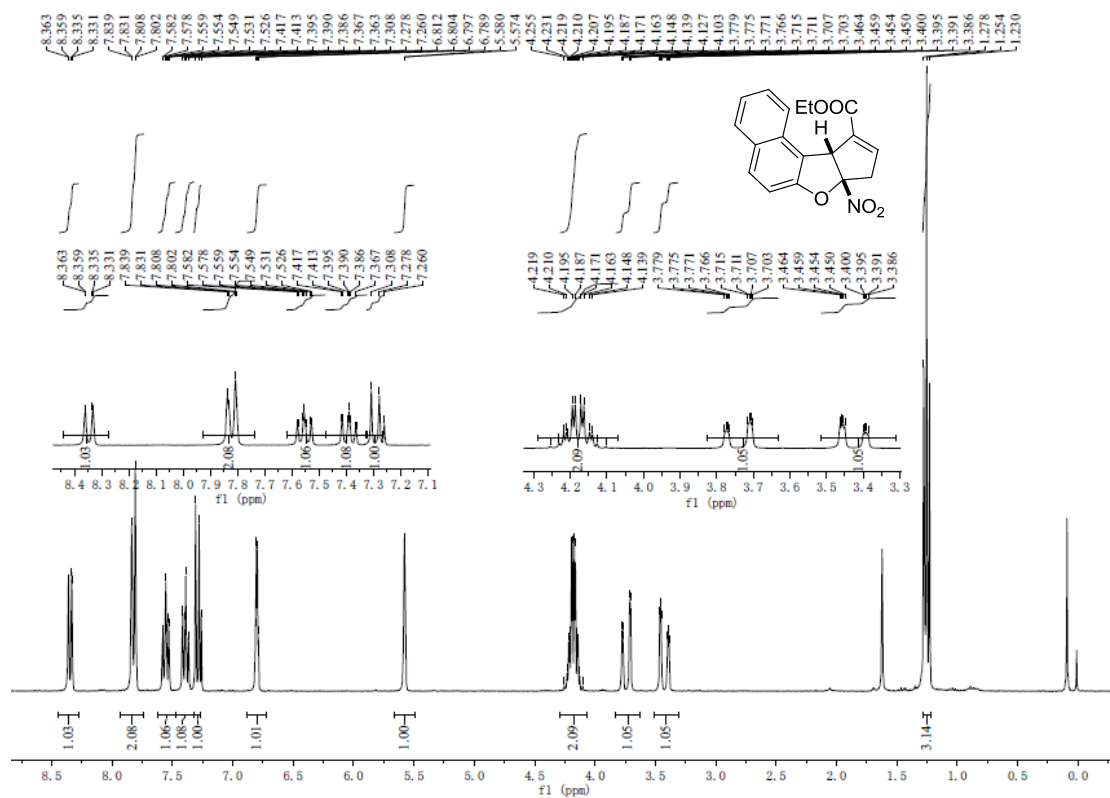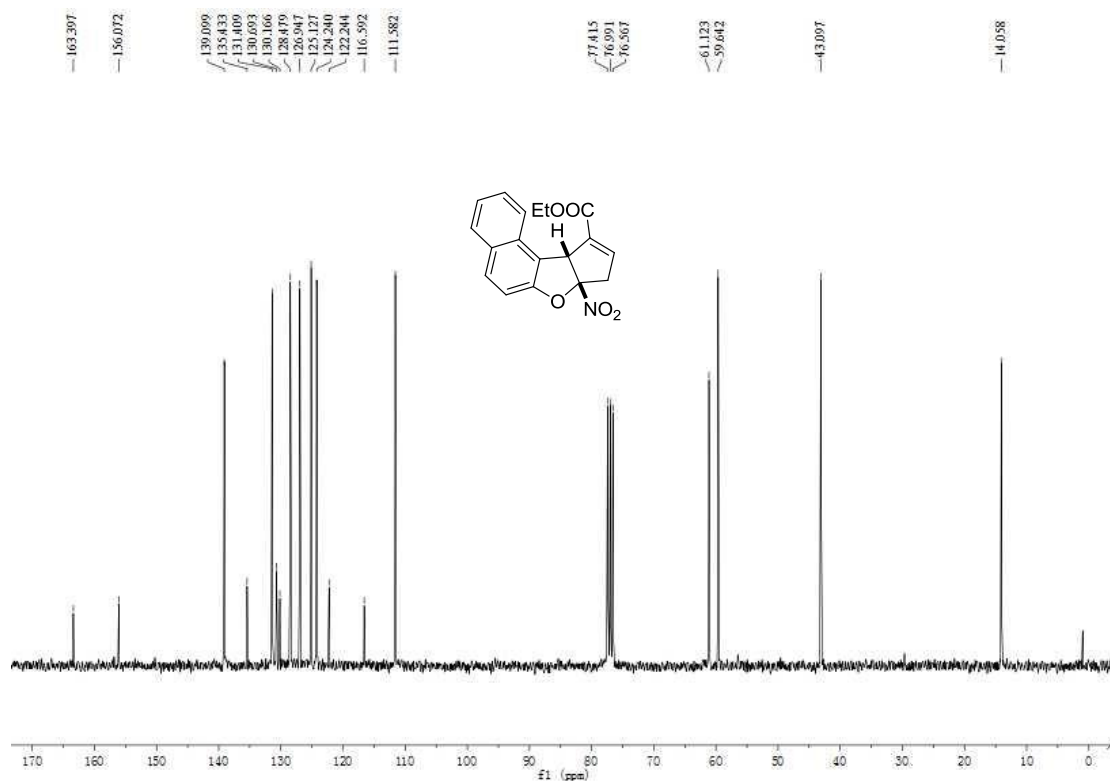



# $^1\text{H}$ and $^{13}\text{C}$ NMR of **5b**

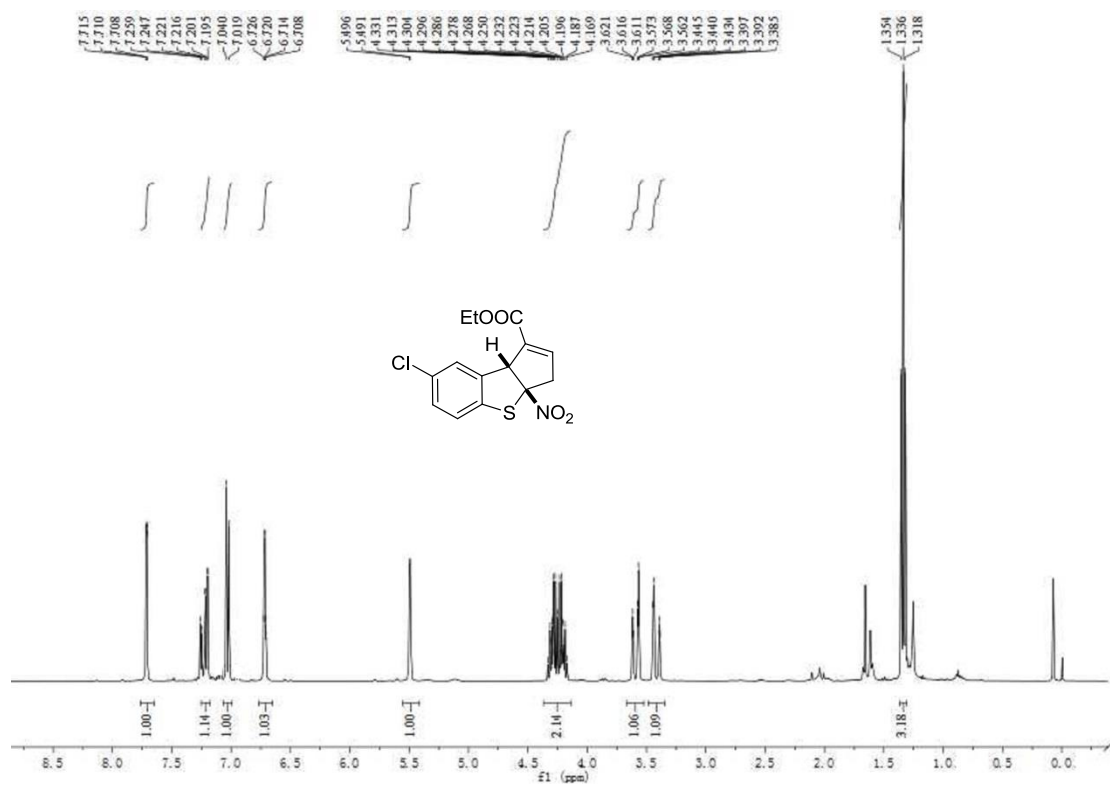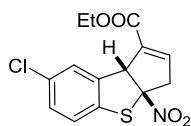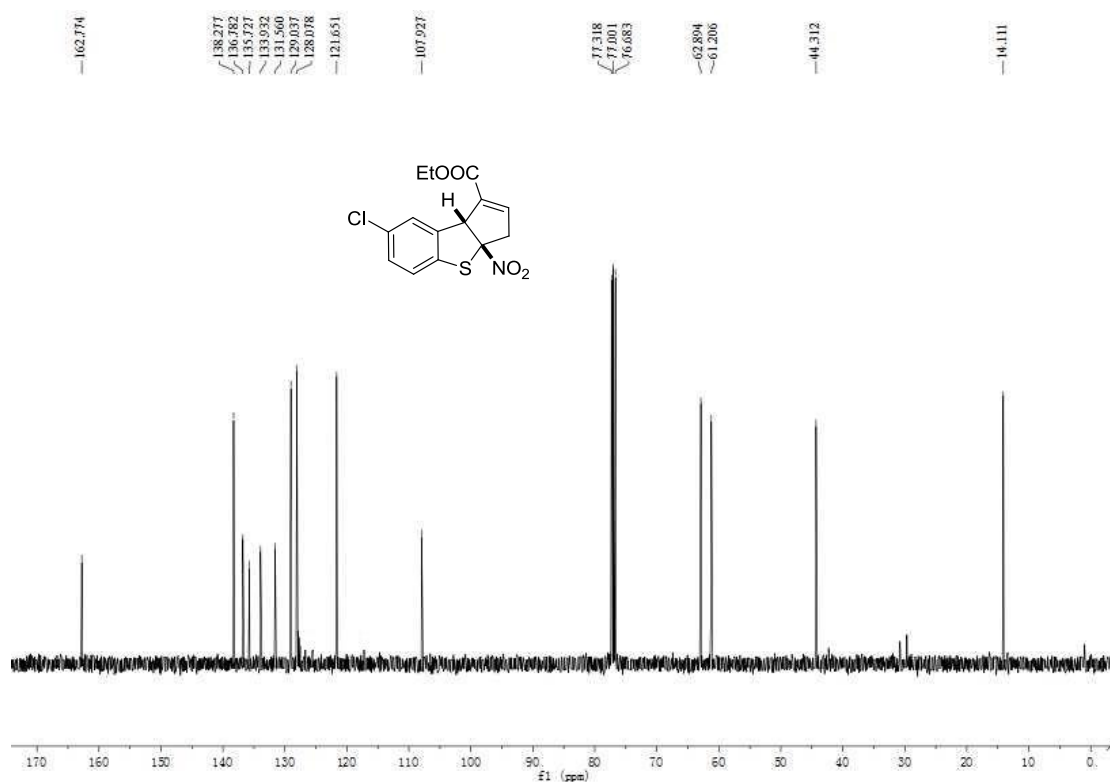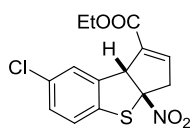



<sup>1</sup>H and <sup>13</sup>C NMR of 5c

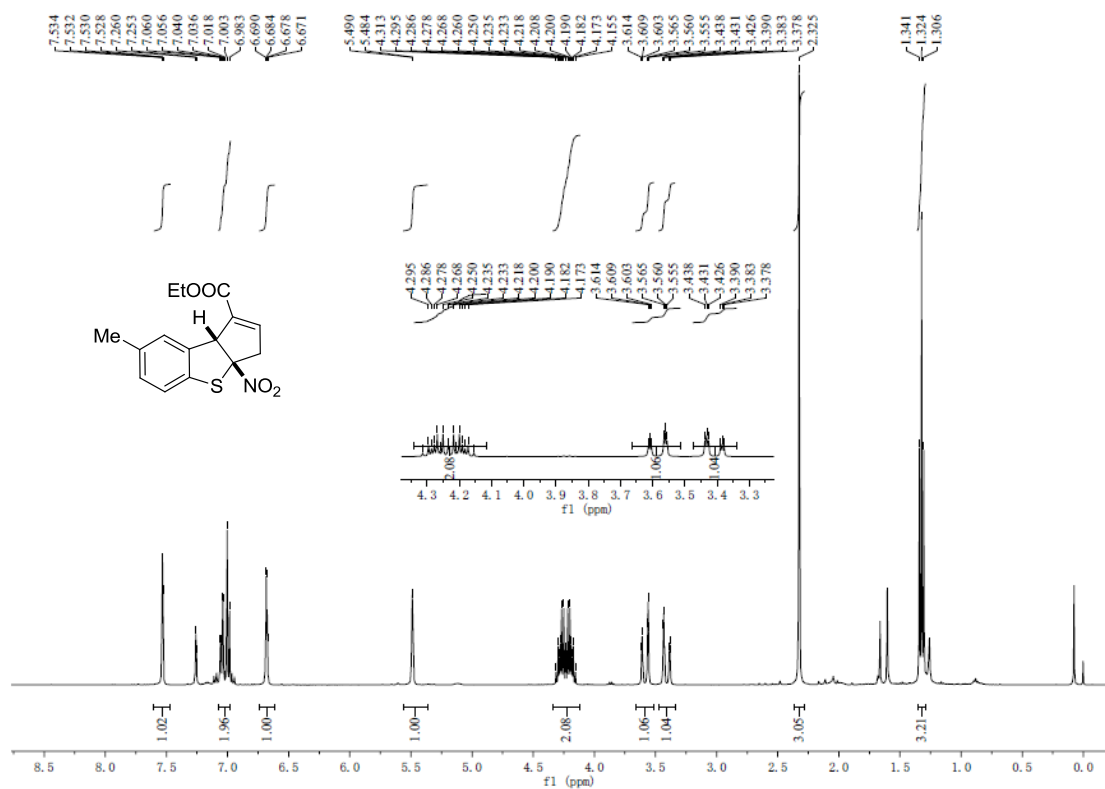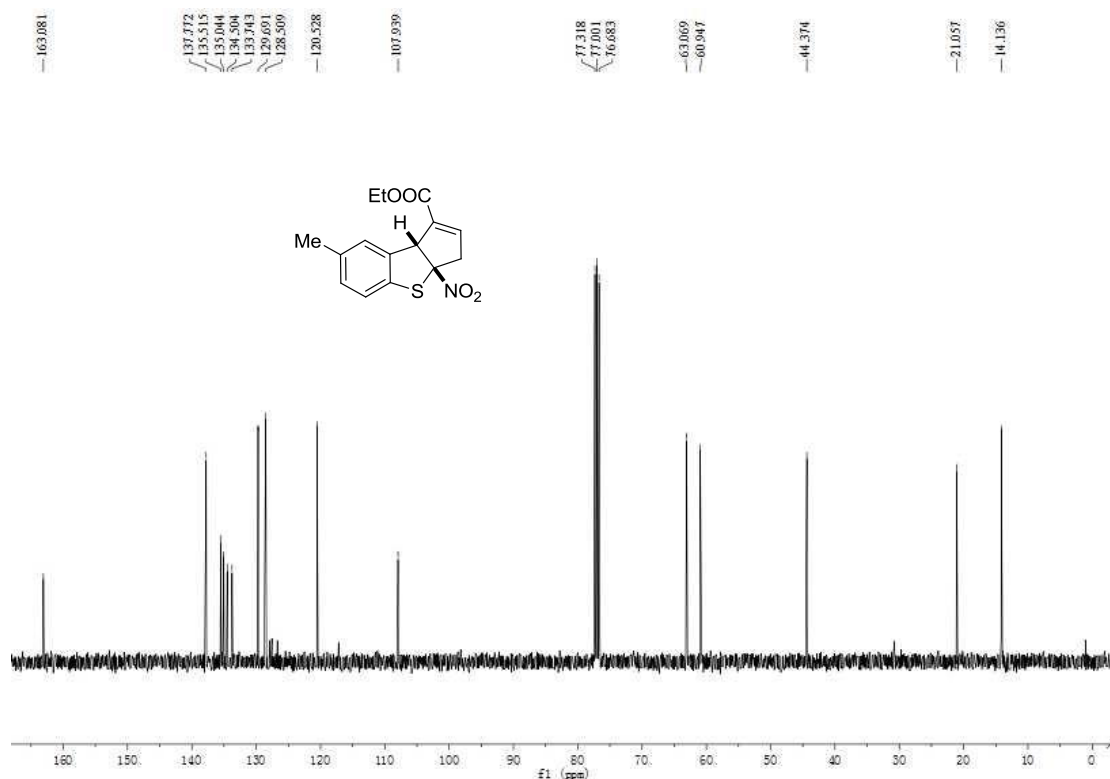

$^1\text{H}$  and  $^{13}\text{C}$  NMR of **5d**

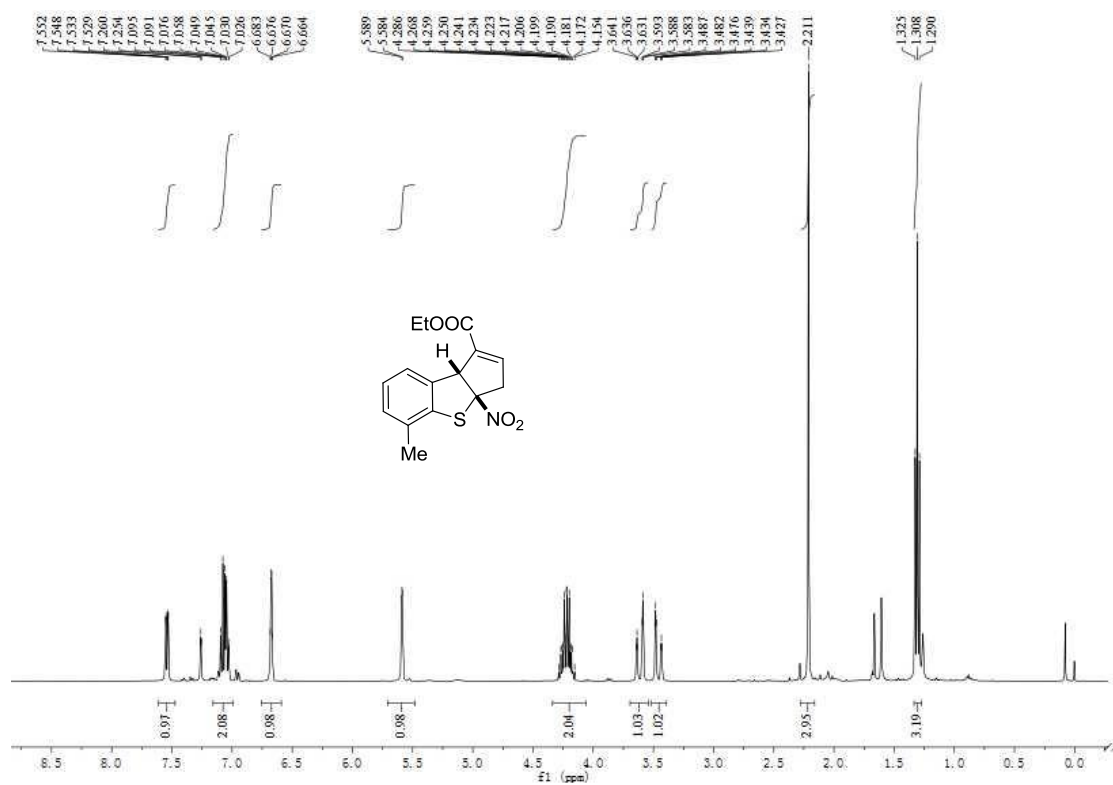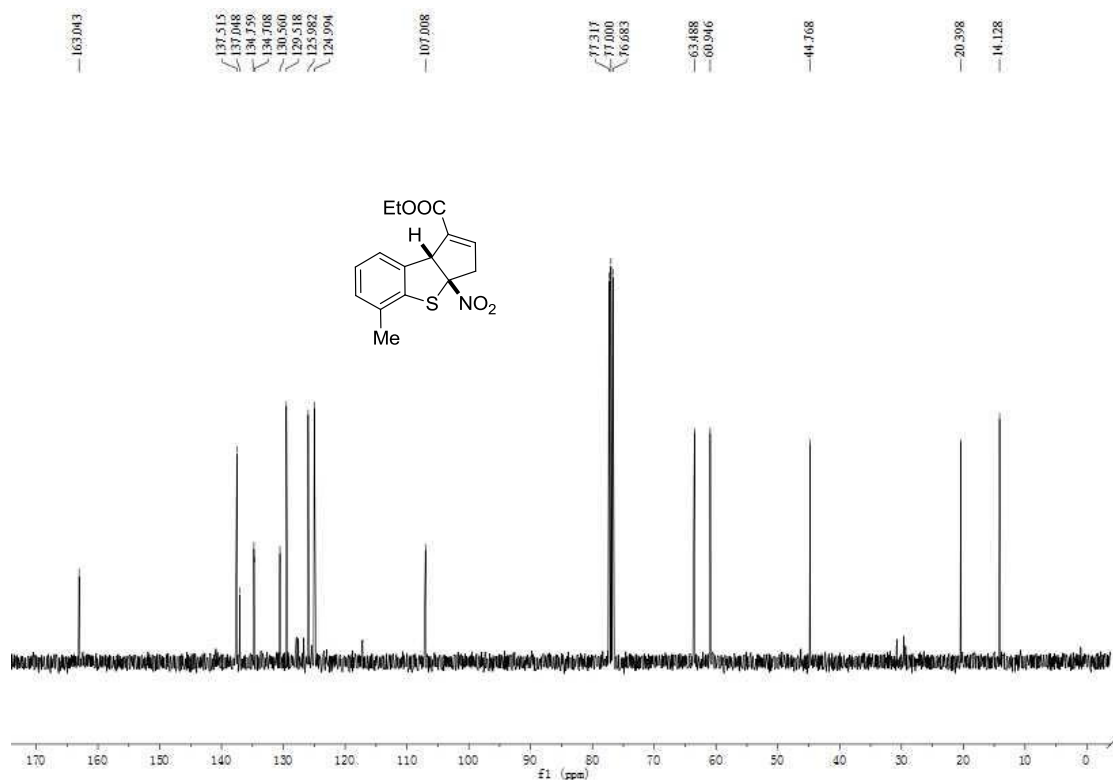

$^1\text{H}$  and  $^{13}\text{C}$  NMR of **5e**

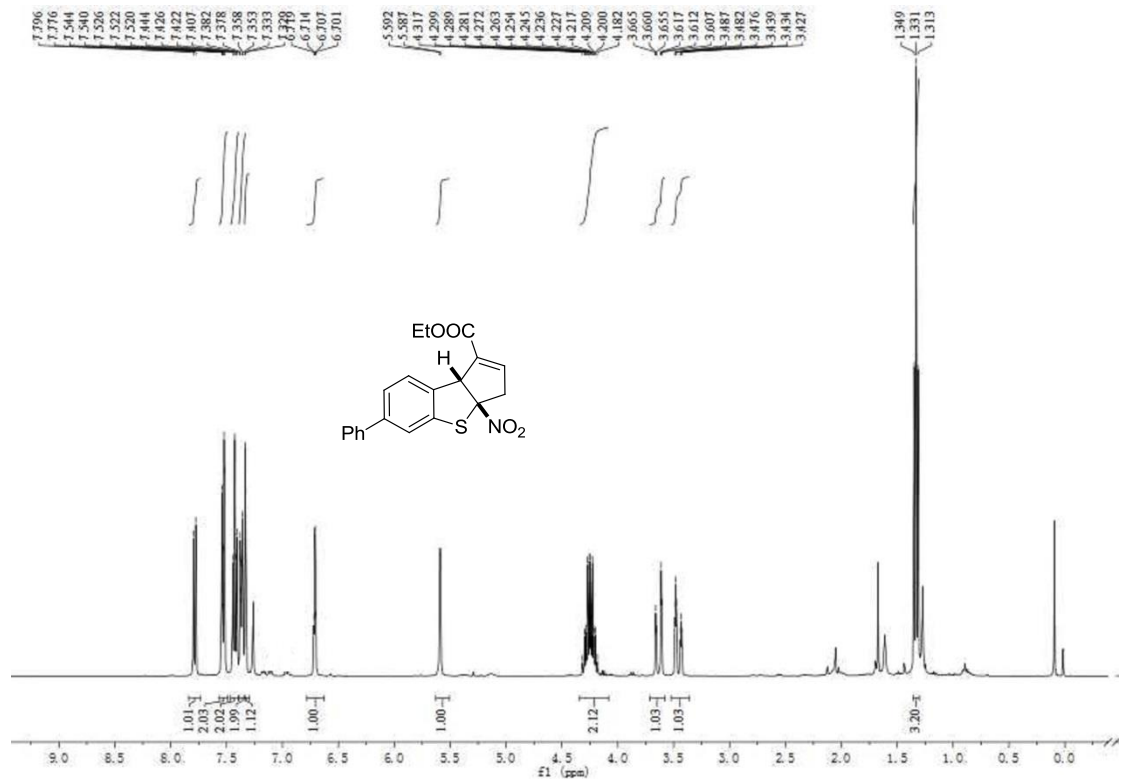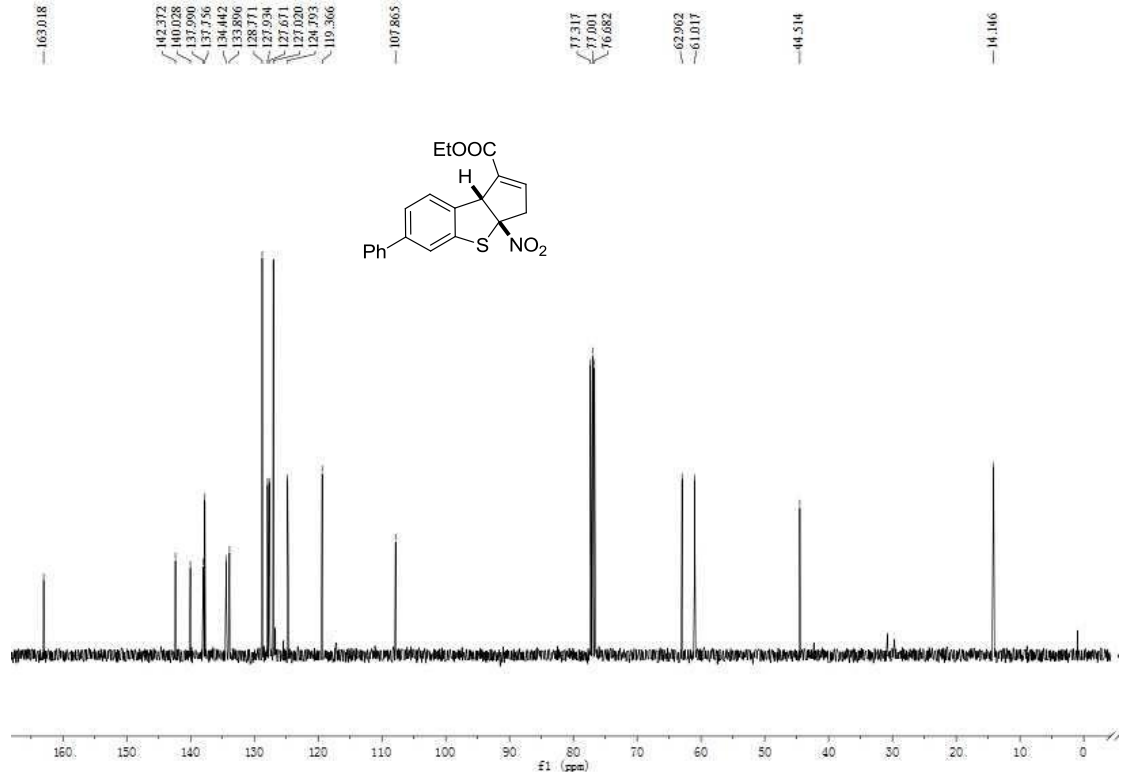

<sup>1</sup>H and <sup>13</sup>C NMR of **7a**

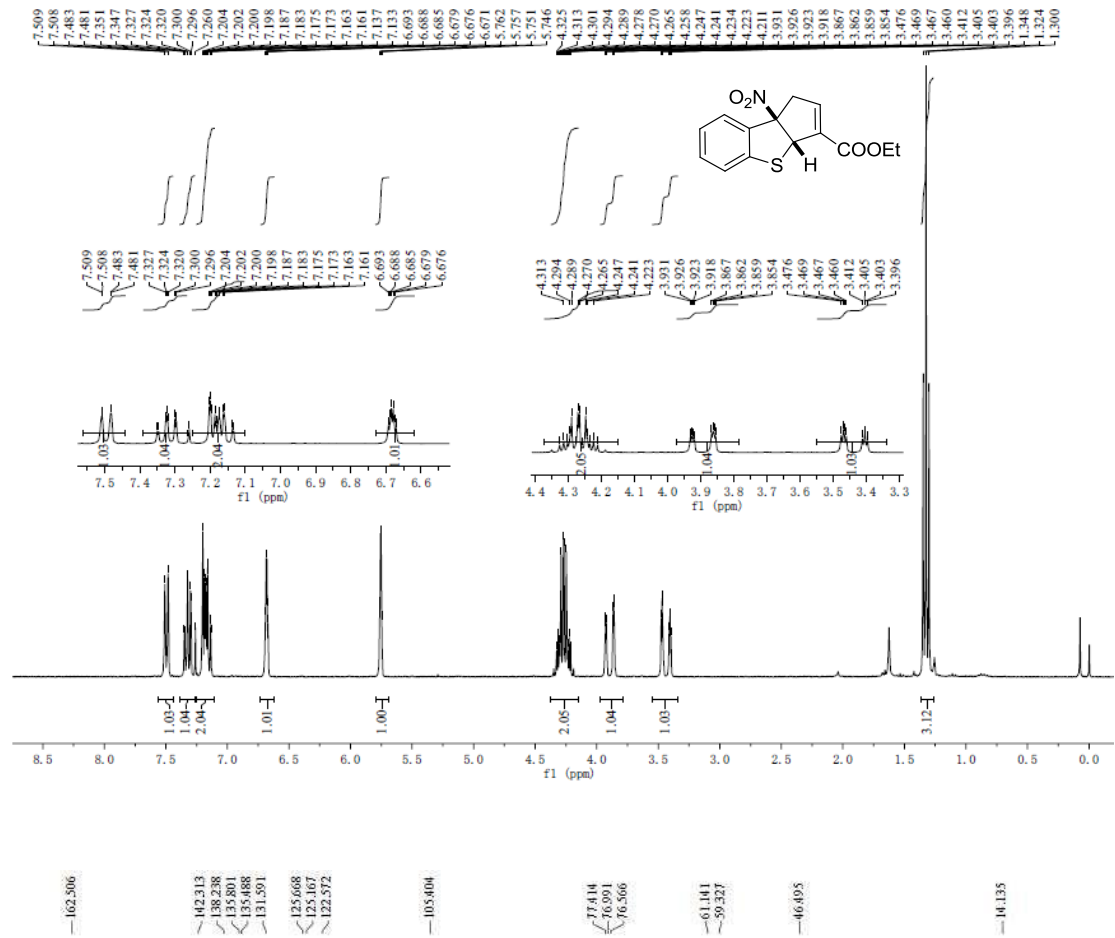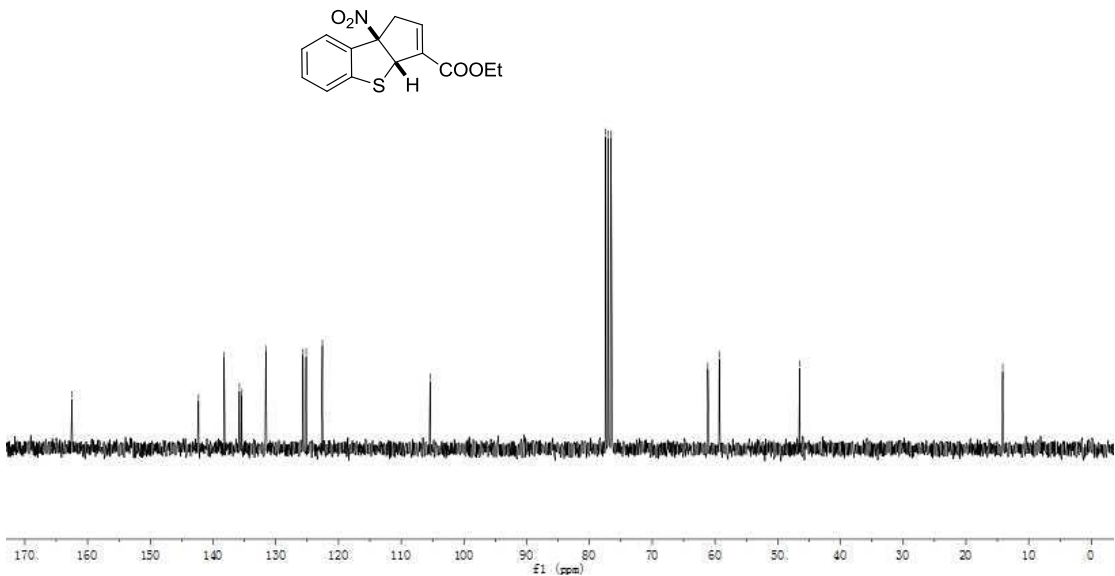

<sup>1</sup>H and <sup>13</sup>C NMR of **7b**

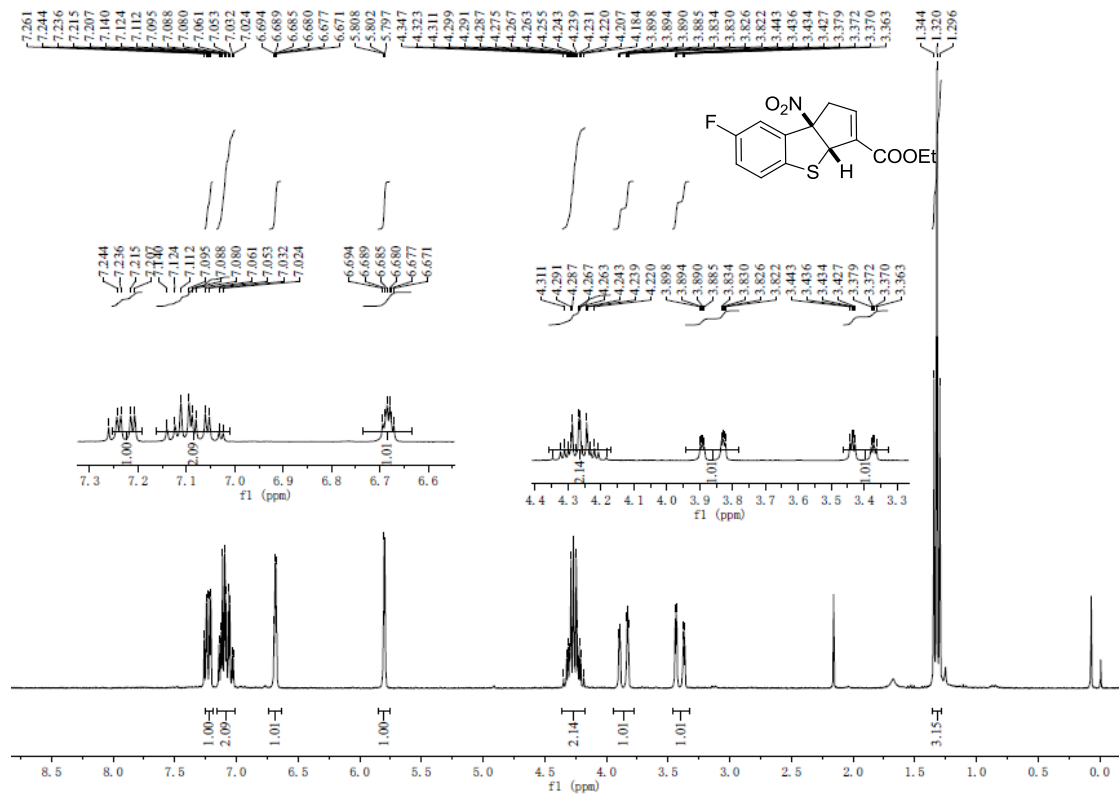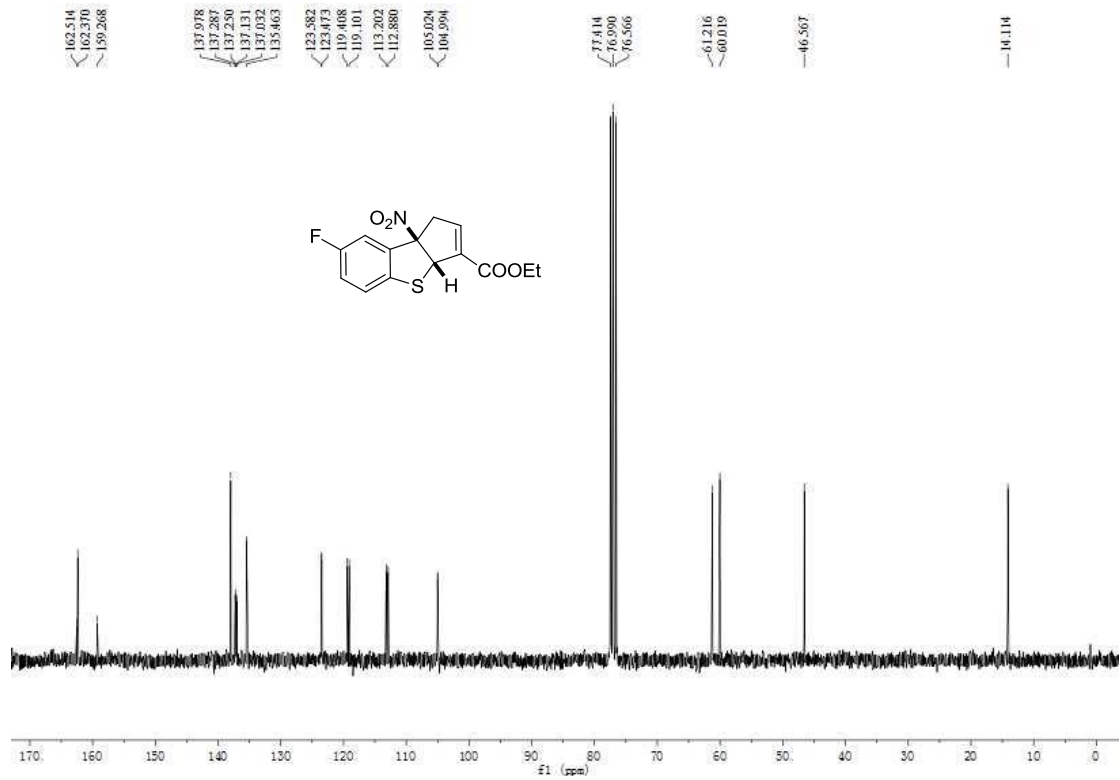

$^1\text{H}$  and  $^{13}\text{C}$  NMR of **7c**

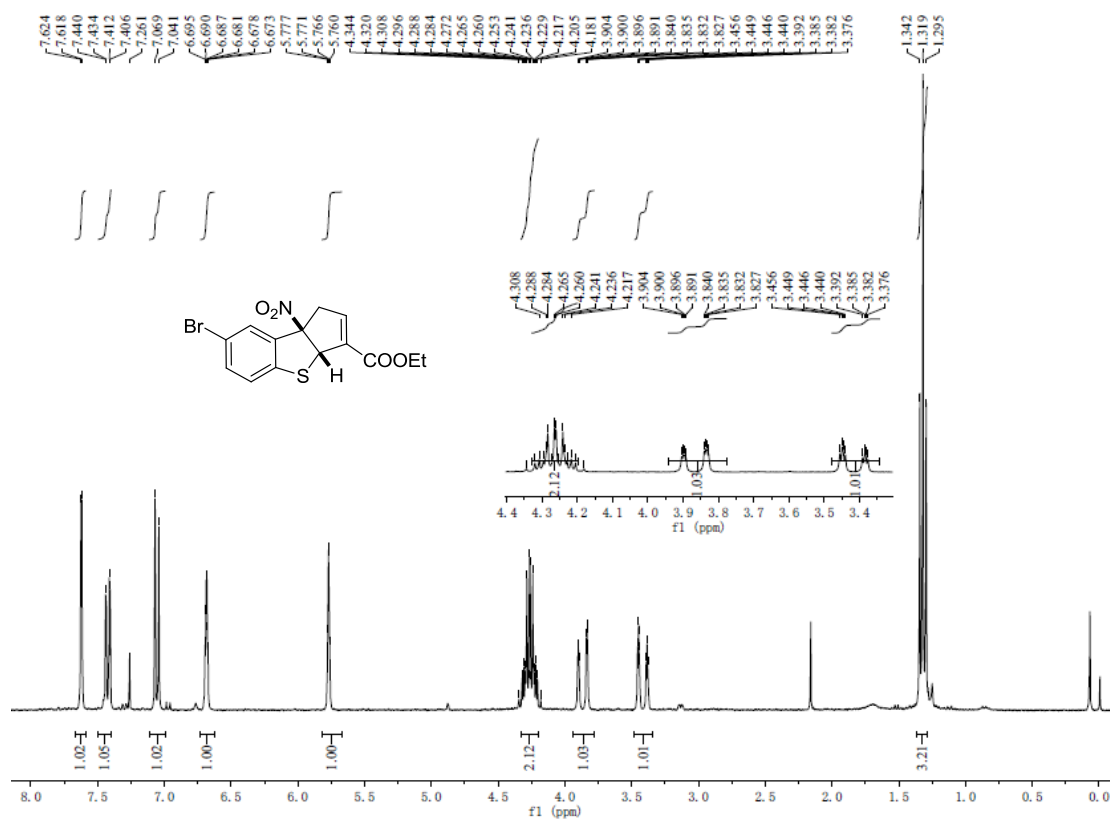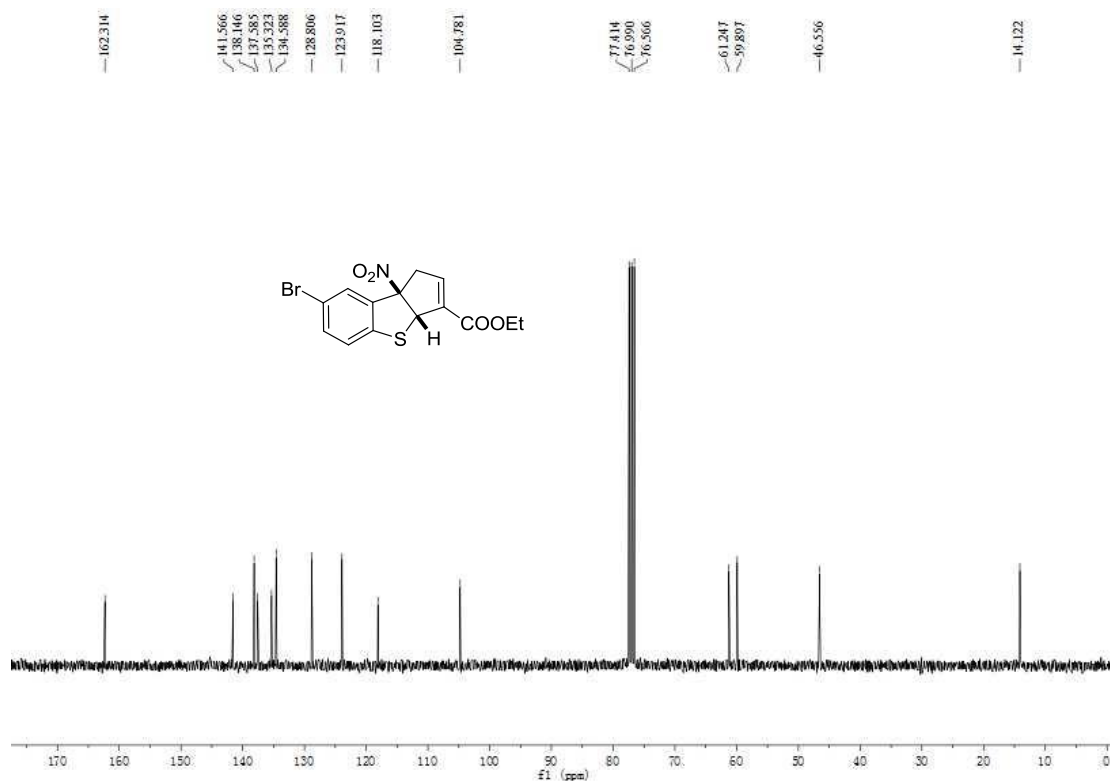

# $^1\text{H}$ and $^{13}\text{C}$ NMR of 7d

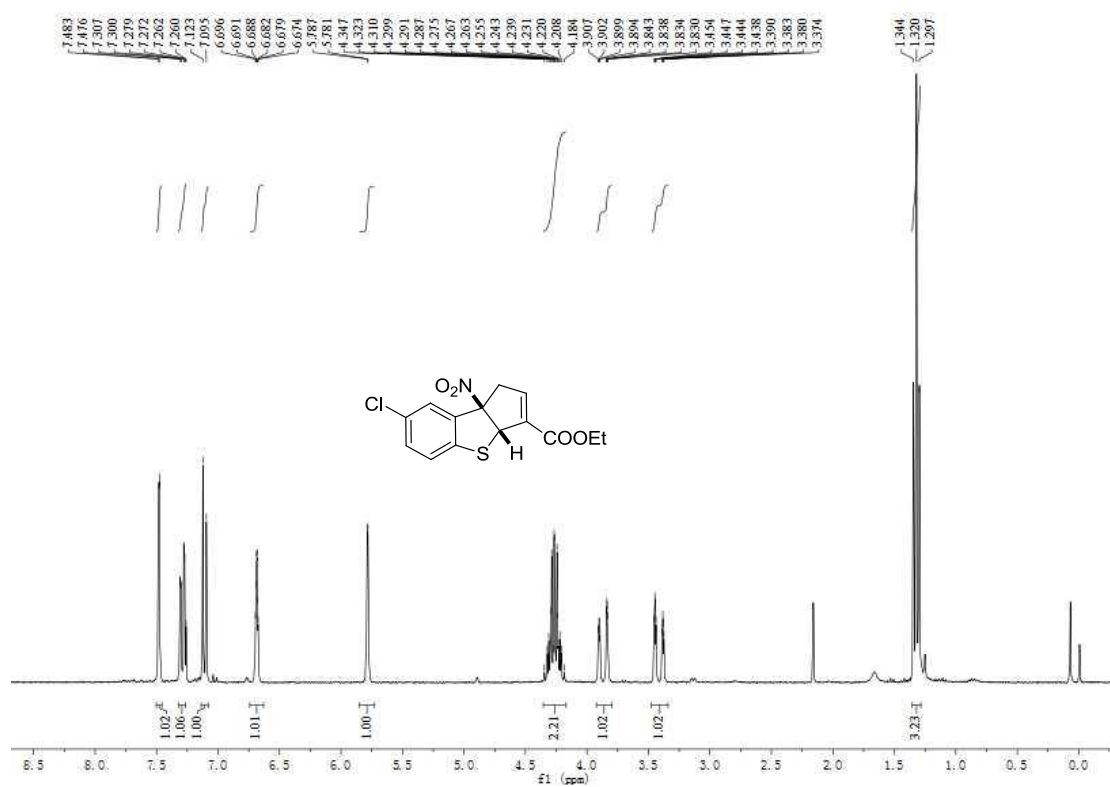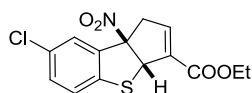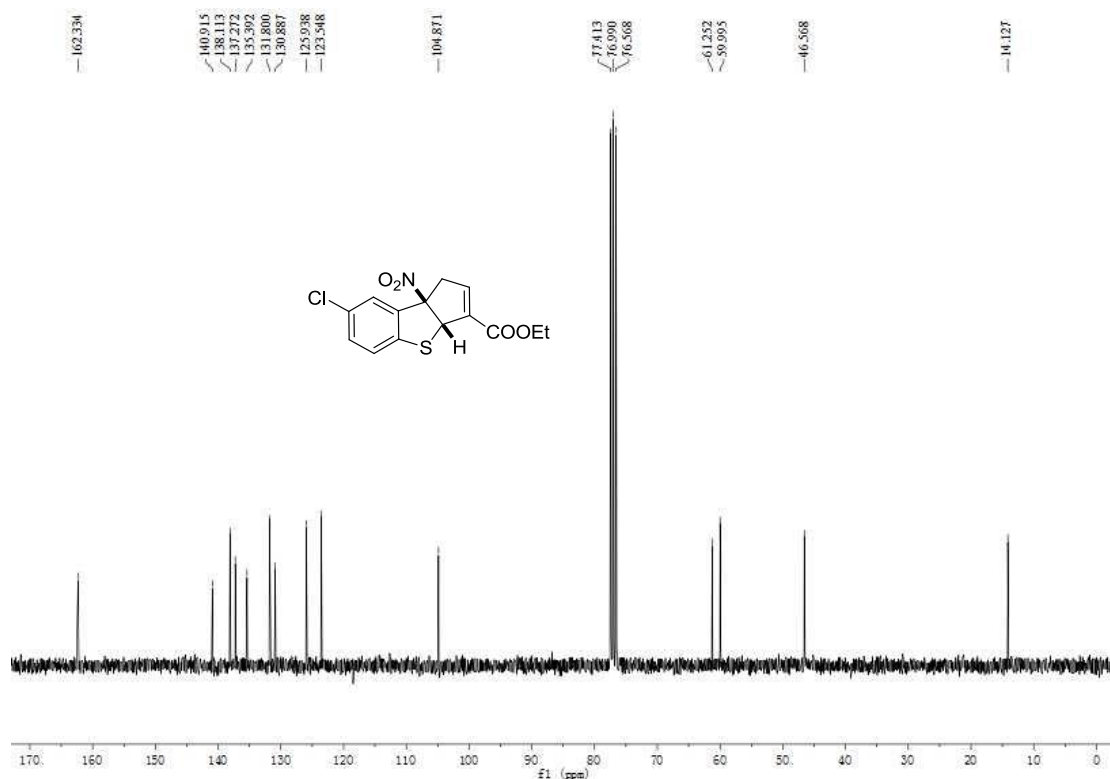

<sup>1</sup>H and <sup>13</sup>C NMR of 7e

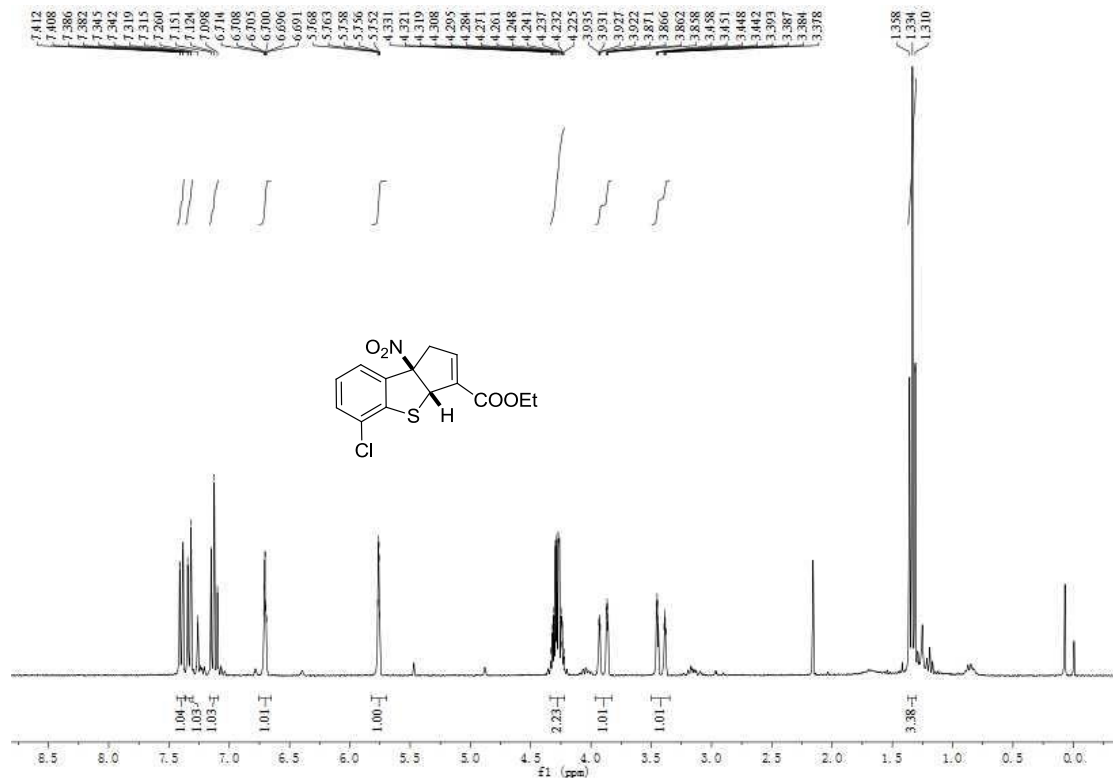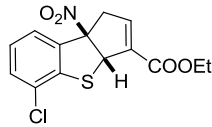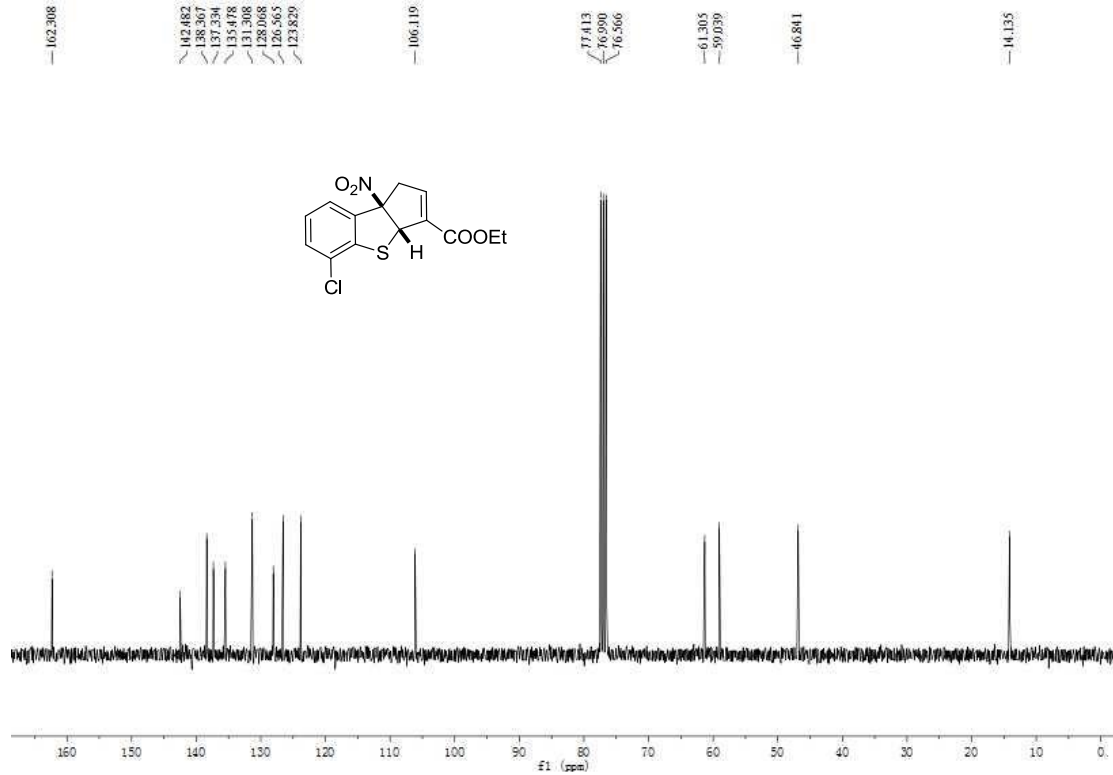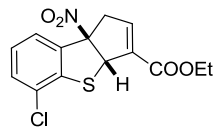



$^1\text{H}$  and  $^{13}\text{C}$  NMR of **7f**

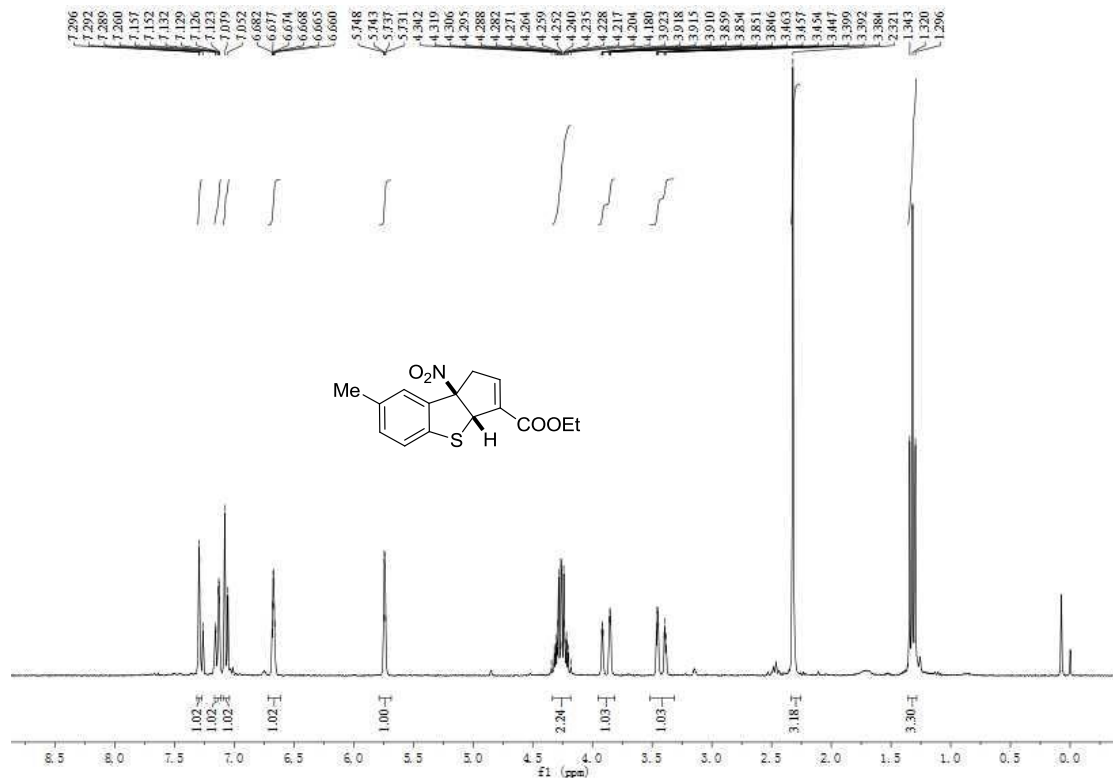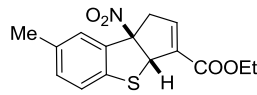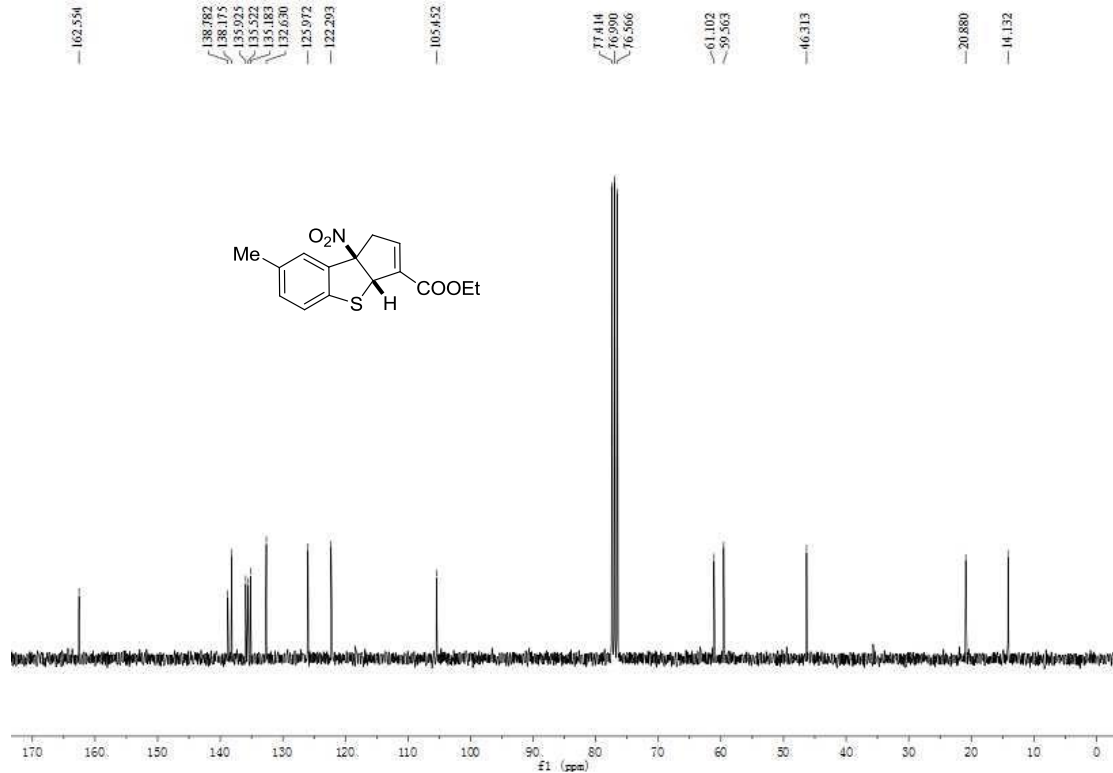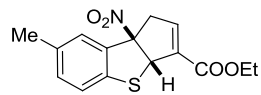

$^1\text{H}$  and  $^{13}\text{C}$  NMR of **7g**

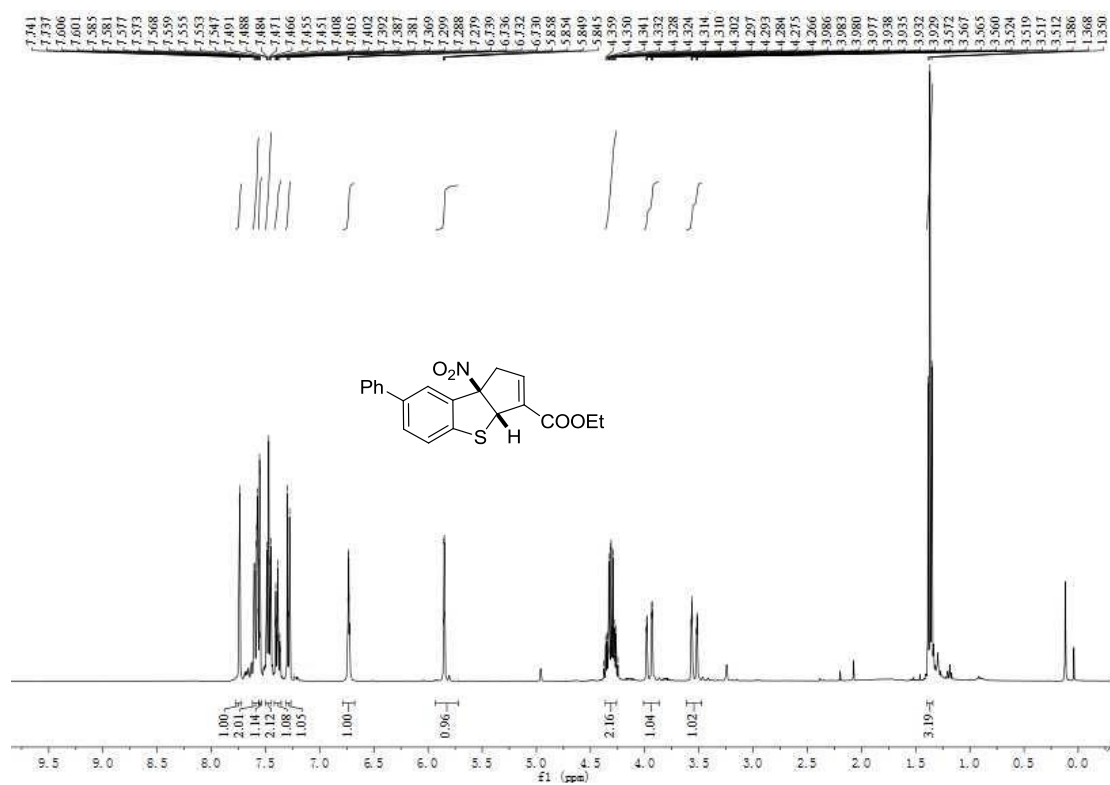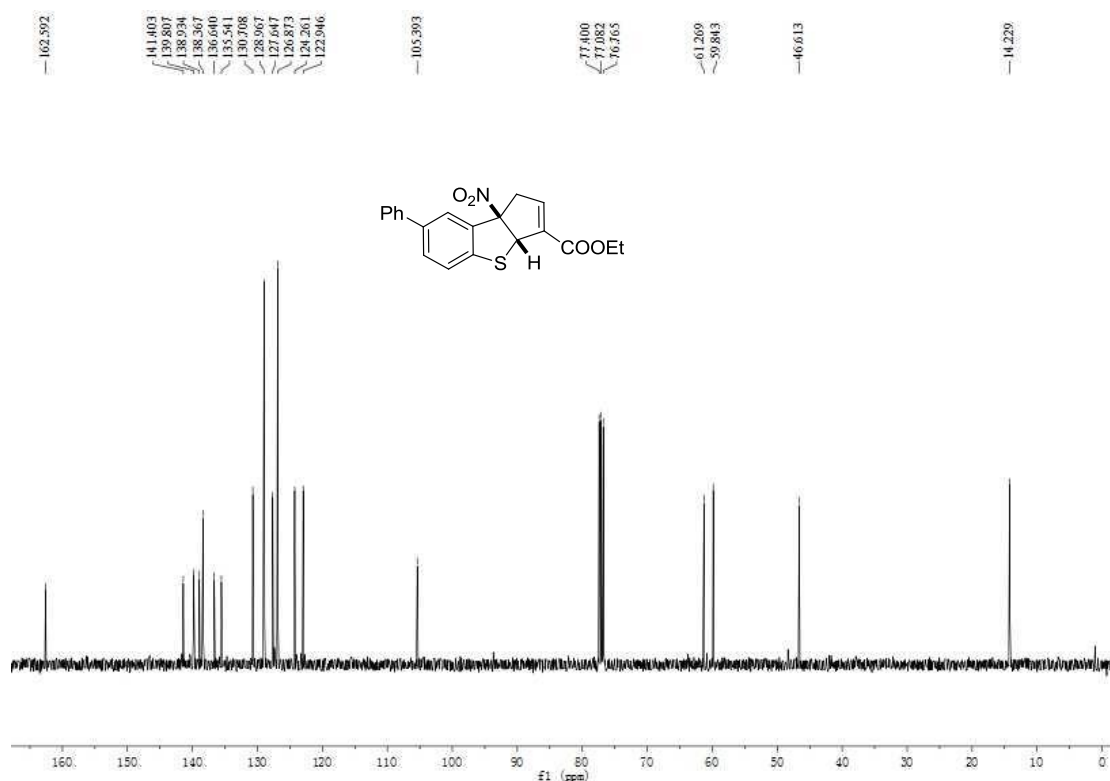

# <sup>1</sup>H and <sup>13</sup>C NMR of 7h

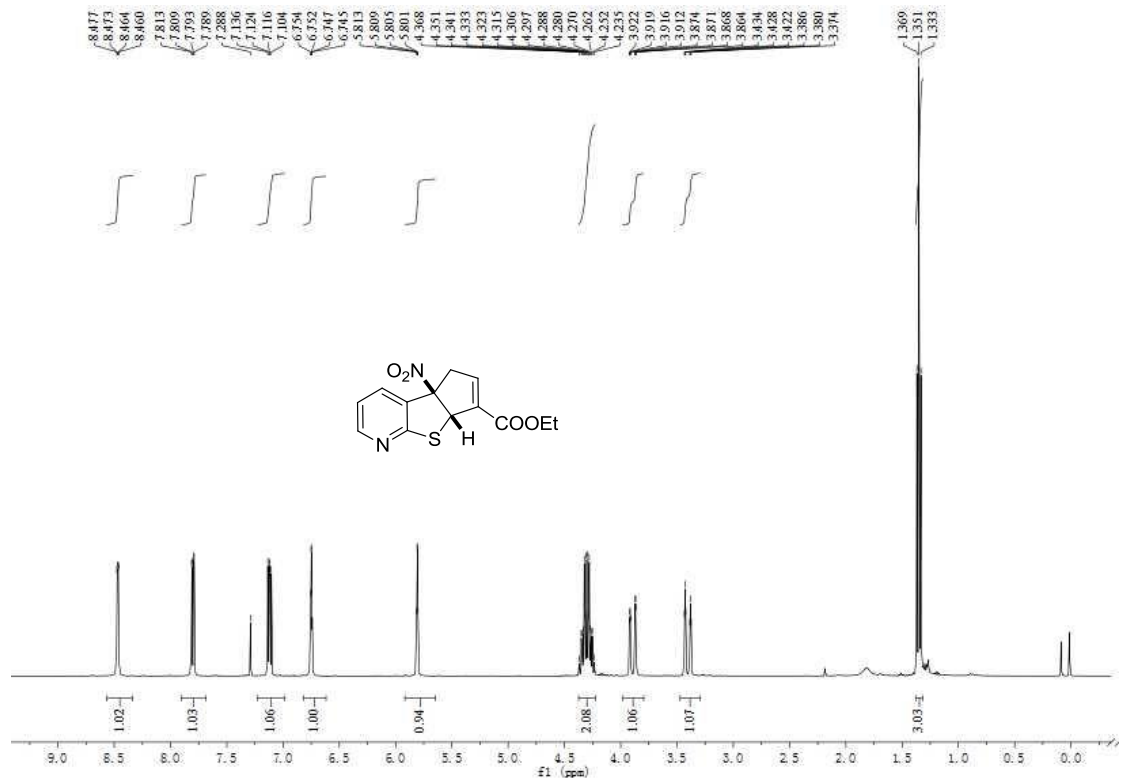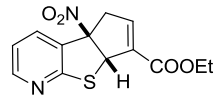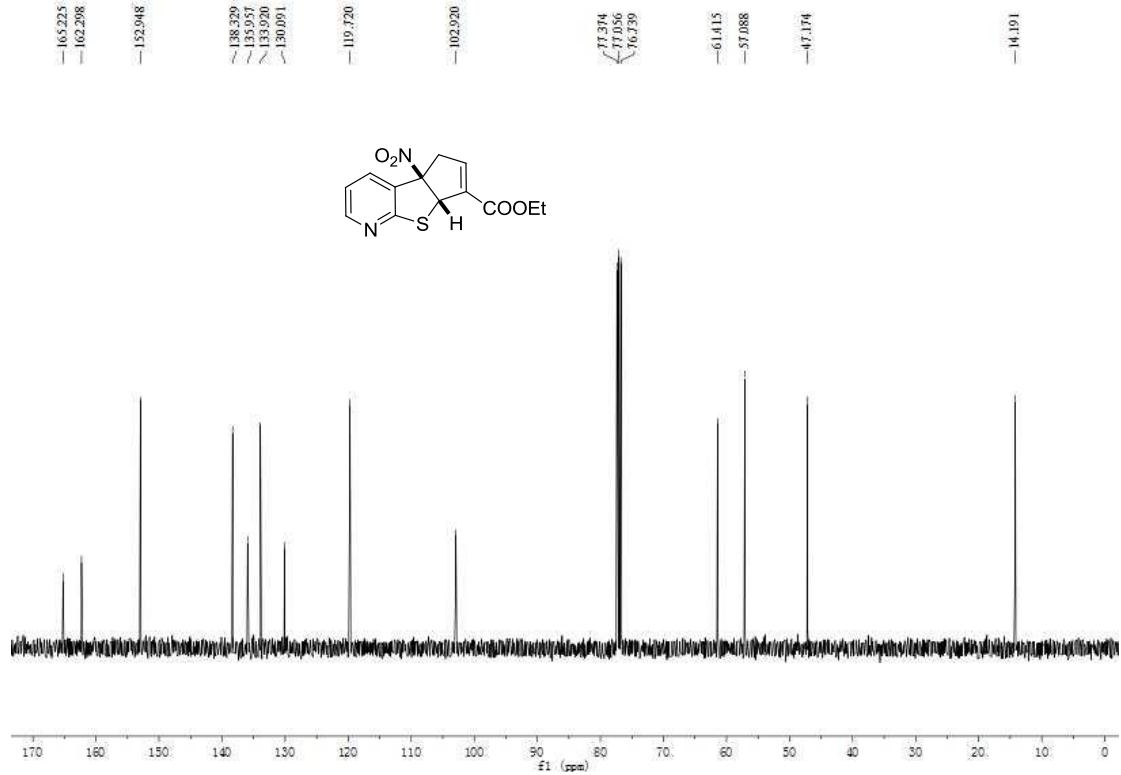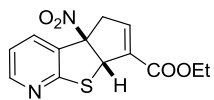

<sup>1</sup>H and <sup>13</sup>C NMR of 8

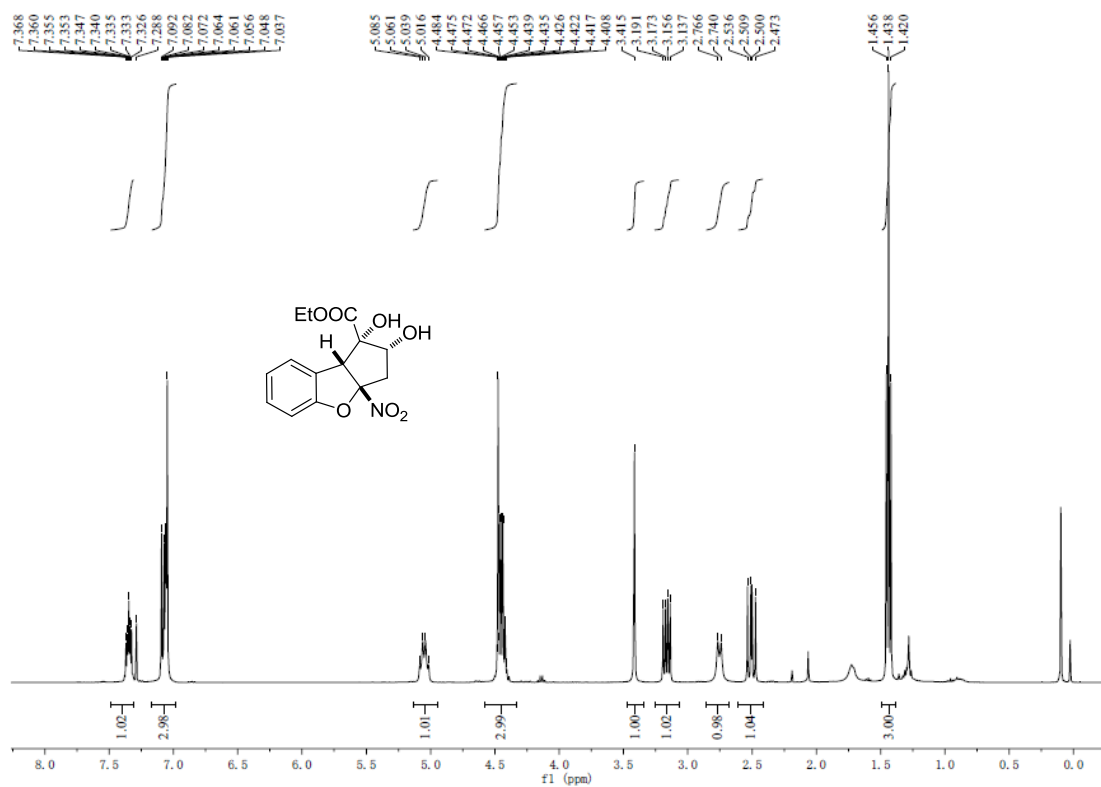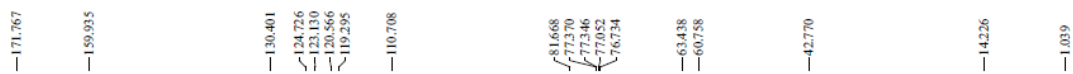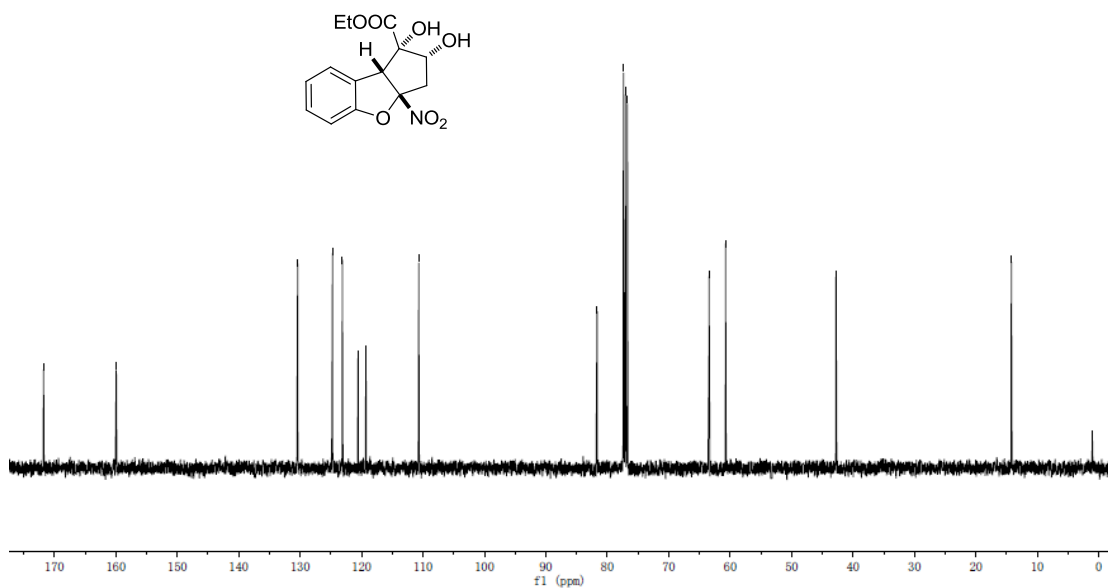

<sup>1</sup>H and <sup>13</sup>C NMR of 9

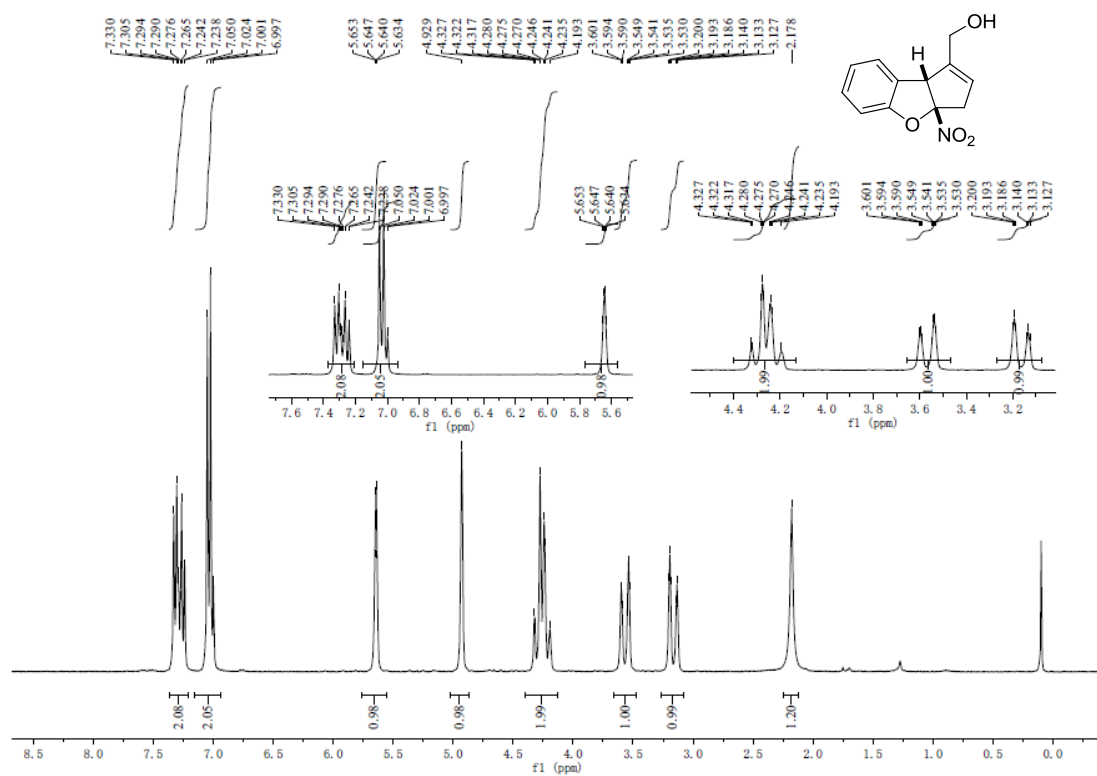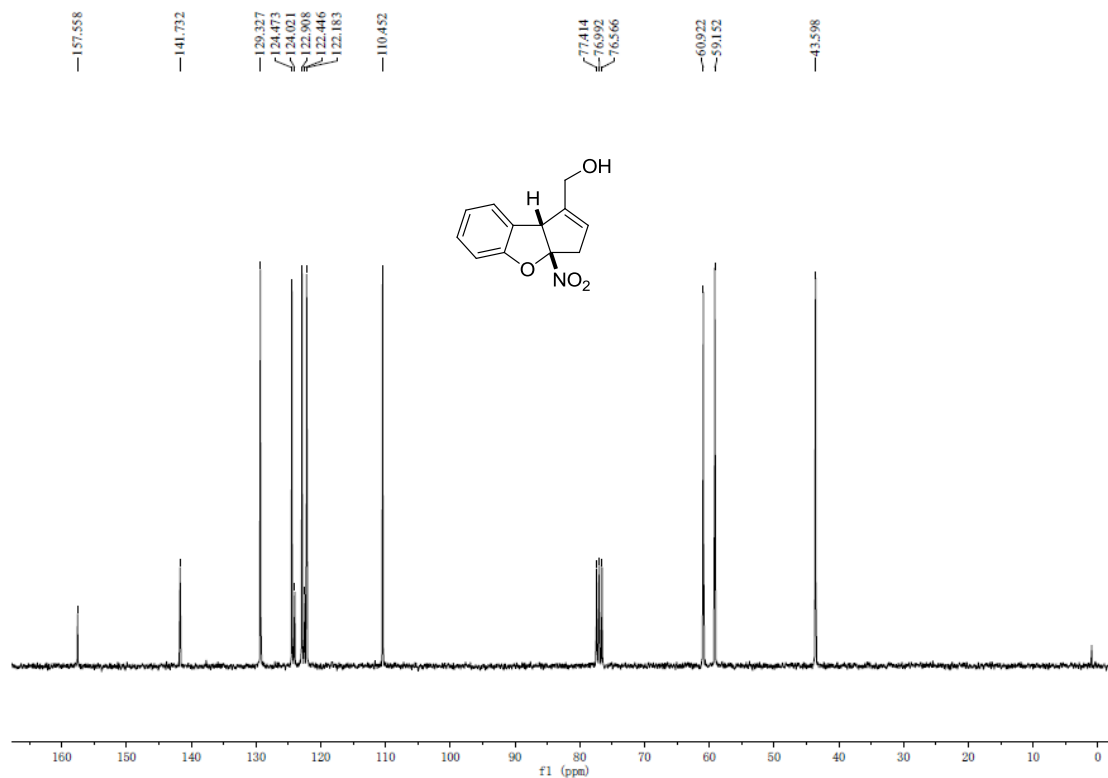

### HPLC of 3a

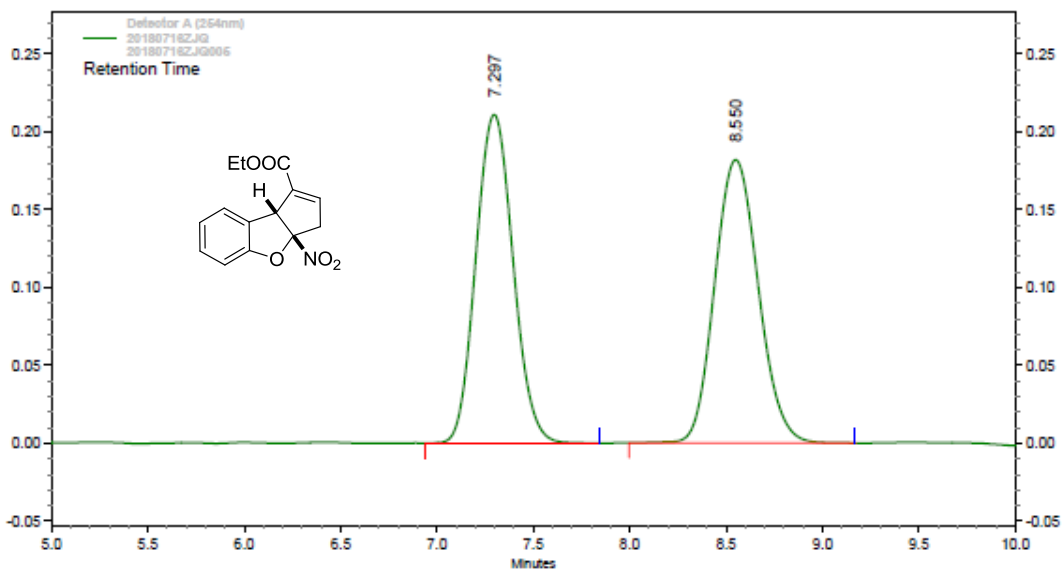

Detector  
A (254nm)

| Pk # | Retention Time | Height | Height Percent | Area    | Area Percent |
|------|----------------|--------|----------------|---------|--------------|
| 1    | 7.297          | 210877 | 53.71          | 2833387 | 49.76        |
| 2    | 8.550          | 181773 | 46.29          | 2860294 | 50.24        |

| Totals |  | 392650 | 100.00 | 5693681 | 100.00 |
|--------|--|--------|--------|---------|--------|
|--------|--|--------|--------|---------|--------|

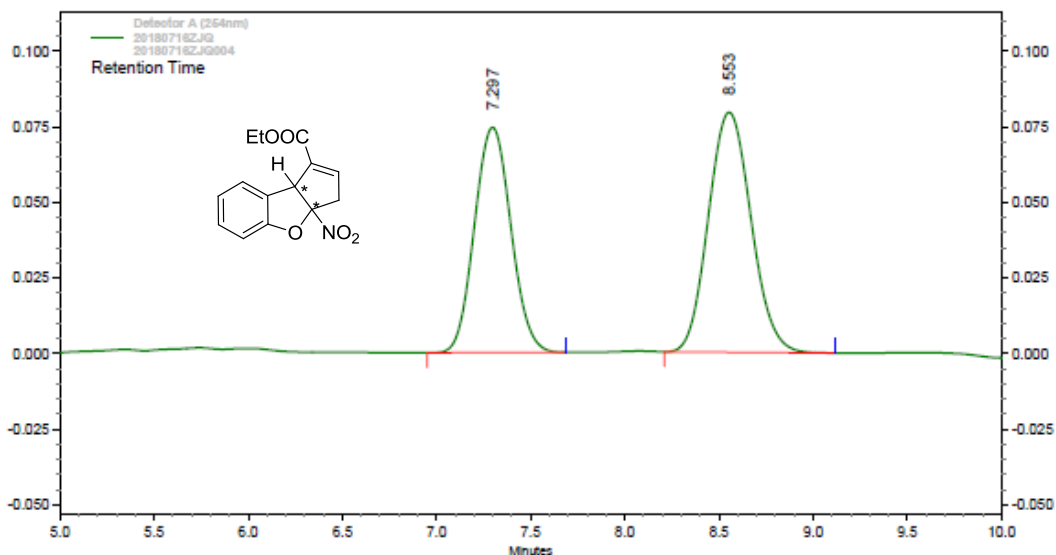

Detector  
A (254nm)

| Pk # | Retention Time | Height | Height Percent | Area    | Area Percent |
|------|----------------|--------|----------------|---------|--------------|
| 1    | 7.297          | 74516  | 48.41          | 1005196 | 44.51        |
| 2    | 8.553          | 79407  | 51.59          | 1253011 | 55.49        |

| Totals |  | 153923 | 100.00 | 2258207 | 100.00 |
|--------|--|--------|--------|---------|--------|
|--------|--|--------|--------|---------|--------|
